# Supplementary material for: An artificial neural network model to diagnose non-obstructive azoospermia based on RNA-binding protein-related genes
Source: Aging (Albany NY). 2023 Apr 24;15(8):3120–40. doi: 10.18632/aging.204674 (PMC10188335; doi:10.18632/aging.204674)
Supplement: Supplementary Table 1 [file aging-15-204674-s001.xls]

## Sheet: Sheet1
Supplementary Table 1. 1542 RBPs collected from previous reports.
Gene Symbol	Description	Gene ID	Protein ID
RPS11	ribosomal protein S11 [Source:HGNC Symbol;Acc:10384]	ENSG00000142534	ENSP00000470447
ERAL1	Era G-protein-like 1 (E. coli) [Source:HGNC Symbol;Acc:3424]	ENSG00000132591	ENSP00000254928
DDX27	DEAD (Asp-Glu-Ala-Asp) box polypeptide 27 [Source:HGNC Symbol;Acc:15837]	ENSG00000124228	ENSP00000360828
DEK	DEK oncogene [Source:HGNC Symbol;Acc:2768]	ENSG00000124795	ENSP00000380414
PSMA6	proteasome (prosome, macropain) subunit, alpha type, 6 [Source:HGNC Symbol;Acc:9535]	ENSG00000100902	ENSP00000261479
TRIM56	tripartite motif containing 56 [Source:HGNC Symbol;Acc:19028]	ENSG00000169871	ENSP00000305161
TRIM71	TRIM71 tripartite motif containing 71, E3 ubiquitin protein ligase [ Homo sapiens (human) ]	ENSG00000206557	ENSP00000373272
UPF2	UPF2 regulator of nonsense transcripts homolog (yeast) [Source:HGNC Symbol;Acc:17854]	ENSG00000151461	ENSP00000348708
FARS2	phenylalanyl-tRNA synthetase 2, mitochondrial [Source:HGNC Symbol;Acc:21062]	ENSG00000145982	ENSP00000316335
FDXACB1	ferredoxin-fold anticodon binding domain containing 1 [Source:HGNC Symbol;Acc:25110]	ENSG00000262028	ENSP00000460095
ALKBH8	alkB, alkylation repair homolog 8 (E. coli) [Source:HGNC Symbol;Acc:25189]	ENSG00000137760	ENSP00000415885
ZNF579	zinc finger protein 579 [Source:HGNC Symbol;Acc:26646]	ENSG00000218891	ENSP00000320188
POLR2B	polymerase (RNA) II (DNA directed) polypeptide B, 140kDa [Source:HGNC Symbol;Acc:9188]	ENSG00000047315	ENSP00000391452
WDR12	WD repeat domain 12 [Source:HGNC Symbol;Acc:14098]	ENSG00000138442	ENSP00000261015
RPF1	ribosome production factor 1 homolog (S. cerevisiae) [Source:HGNC Symbol;Acc:30350]	ENSG00000117133	ENSP00000359688
MRPS34	mitochondrial ribosomal protein S34 [Source:HGNC Symbol;Acc:16618]	ENSG00000074071	ENSP00000380531
UBTF	upstream binding transcription factor, RNA polymerase I [Source:HGNC Symbol;Acc:12511]	ENSG00000108312	ENSP00000302640
CDC5L	cell division cycle 5-like [Source:HGNC Symbol;Acc:1743]	ENSG00000096401	ENSP00000360532
DAZAP1	DAZ associated protein 1 [Source:HGNC Symbol;Acc:2683]	ENSG00000071626	ENSP00000233078
MSI1	musashi RNA-binding protein 1 [Source:HGNC Symbol;Acc:7330]	ENSG00000135097	ENSP00000257552
MSI2	musashi RNA-binding protein 2 [Source:HGNC Symbol;Acc:18585]	ENSG00000153944	ENSP00000414671
TARDBP	TAR DNA binding protein [Source:HGNC Symbol;Acc:11571]	ENSG00000120948	ENSP00000404666
TRIT1	tRNA isopentenyltransferase 1 [Source:HGNC Symbol;Acc:20286]	ENSG00000043514	ENSP00000361905
MRPL36	mitochondrial ribosomal protein L36 [Source:HGNC Symbol;Acc:14490]	ENSG00000171421	ENSP00000372093
KPNB1	karyopherin (importin) beta 1 [Source:HGNC Symbol;Acc:6400]	ENSG00000108424	ENSP00000290158
ZNFX1	zinc finger, NFX1-type containing 1 [Source:HGNC Symbol;Acc:29271]	ENSG00000124201	ENSP00000379412
SNRNP27	small nuclear ribonucleoprotein 27kDa (U4/U6.U5) [Source:HGNC Symbol;Acc:30240]	ENSG00000124380	ENSP00000244227
RBMS2	RNA binding motif, single stranded interacting protein 2 [Source:HGNC Symbol;Acc:9909]	ENSG00000076067	ENSP00000262031
RBMS1	RNA binding motif, single stranded interacting protein 1 [Source:HGNC Symbol;Acc:9907]	ENSG00000153250	ENSP00000387280
RBMS3	RNA binding motif, single stranded interacting protein 3 [Source:HGNC Symbol;Acc:13427]	ENSG00000144642	ENSP00000391934
LARS2	leucyl-tRNA synthetase 2, mitochondrial [Source:HGNC Symbol;Acc:17095]	ENSG00000011376	ENSP00000412893
KIAA0020	KIAA0020 [Source:HGNC Symbol;Acc:29676]	ENSG00000080608	ENSP00000380982
RBFOX1	RNA binding protein, fox-1 homolog (C. elegans) 1 [Source:HGNC Symbol;Acc:18222]	ENSG00000078328	ENSP00000344196
RBFOX2	RNA binding protein, fox-1 homolog (C. elegans) 2 [Source:HGNC Symbol;Acc:9906]	ENSG00000100320	ENSP00000352328
RBFOX3	RNA binding protein, fox-1 homolog (C. elegans) 3 [Source:HGNC Symbol;Acc:27097]	ENSG00000267483	ENSP00000467132
CWF19L1	CWF19-like 1, cell cycle control (S. pombe) [Source:HGNC Symbol;Acc:25613]	ENSG00000095485	ENSP00000326411
CWF19L2	CWF19-like 2, cell cycle control (S. pombe) [Source:HGNC Symbol;Acc:26508]	ENSG00000152404	ENSP00000282251
ZC3H15	zinc finger CCCH-type containing 15 [Source:HGNC Symbol;Acc:29528]	ENSG00000065548	ENSP00000338788
LONP1	lon peptidase 1, mitochondrial [Source:HGNC Symbol;Acc:9479] [Type: protein coding Ensembl/Havana merge]	ENSG00000196365	ENSP00000353826
DBR1	debranching enzyme homolog 1 (S. cerevisiae) [Source:HGNC Symbol;Acc:15594]	ENSG00000138231	ENSP00000260803
RRP15	ribosomal RNA processing 15 homolog (S. cerevisiae) [Source:HGNC Symbol;Acc:24255]	ENSG00000067533	ENSP00000355899
L1TD1	INE-1 type transposase domain containing 1 [Source:HGNC Symbol;Acc:25595]	ENSG00000240563	ENSP00000419901
NMD3	NMD3 homolog (S. cerevisiae) [Source:HGNC Symbol;Acc:24250]	ENSG00000169251	ENSP00000418908
SRSF10	cDNA FLJ30749 fis, clone FEBRA2000402, highly similar to FUS-interacting serine-arginine-rich protein 1; cDNA FLJ43846 fis, clone TESTI4006393, highly similar to FUS-interacting serine-arginine-rich protein 1 [Source:UniProtKB/TrEMBL;Acc:B3KNY6]	ENSG00000215699	ENSP00000363573
SRSF12	serine/arginine-rich splicing factor 12 [Source:HGNC Symbol;Acc:21220]	ENSG00000154548	ENSP00000414302
SRSF2	serine/arginine-rich splicing factor 2 [Source:HGNC Symbol;Acc:10783]	ENSG00000161547	ENSP00000463317
SRSF8	serine/arginine-rich splicing factor 8 [Source:HGNC Symbol;Acc:16988]	ENSG00000180771	ensembl pseudogene- ncbi protein coding gene
RSL1D1	ribosomal L1 domain containing 1 [Source:HGNC Symbol;Acc:24534]	ENSG00000171490	ENSP00000460343
DAP3	death associated protein 3 [Source:HGNC Symbol;Acc:2673]	ENSG00000132676	ENSP00000341692
NARS2	asparaginyl-tRNA synthetase 2, mitochondrial (putative) [Source:HGNC Symbol;Acc:26274]	ENSG00000137513	ENSP00000432240
RBM25	RNA binding motif protein 25 [Source:HGNC Symbol;Acc:23244]	ENSG00000119707	ENSP00000431150
POLR2E	polymerase (RNA) II (DNA directed) polypeptide E, 25kDa [Source:HGNC Symbol;Acc:9192]	ENSG00000099817	ENSP00000215587
TOE1	target of EGR1, member 1 (nuclear) [Source:HGNC Symbol;Acc:15954]	ENSG00000132773	ENSP00000361162
TSFM	Ts translation elongation factor, mitochondrial [Source:HGNC Symbol;Acc:12367]	ENSG00000123297	ENSP00000313877
TPR	translocated promoter region, nuclear basket protein [Source:HGNC Symbol;Acc:12017]	ENSG00000047410	ENSP00000356448
STAU1	staufen, RNA binding protein, homolog 1 (Drosophila) [Source:HGNC Symbol;Acc:11370]	ENSG00000124214	ENSP00000360893
STAU2	staufen, RNA binding protein, homolog 2 (Drosophila) [Source:HGNC Symbol;Acc:11371]	ENSG00000040341	ENSP00000429973
TRMT1L	tRNA methyltransferase 1 homolog (S. cerevisiae)-like [Source:HGNC Symbol;Acc:16782]	ENSG00000121486	ENSP00000356476
METTL3	methyltransferase like 3 [Source:HGNC Symbol;Acc:17563]	ENSG00000165819	ENSP00000298717
REXO2	REX2, RNA exonuclease 2 homolog (S. cerevisiae) [Source:HGNC Symbol;Acc:17851]	ENSG00000076043	ENSP00000442162
MRPL52	mitochondrial ribosomal protein L52 [Source:HGNC Symbol;Acc:16655]	ENSG00000172590	ENSP00000347277
WDR3	WD repeat domain 3 [Source:HGNC Symbol;Acc:12755]	ENSG00000065183	ENSP00000308179
CNOT11	CCR4-NOT transcription complex, subunit 11 [Source:HGNC Symbol;Acc:25217] [Type: protein coding Ensembl/Havana merge]	ENSG00000158435	ENSP00000289382
YTHDC1	YTH domain-containing protein 1 [Source:UniProtKB/TrEMBL;Acc:J3KS01]	ENSG00000257413	ENSP00000447653
METTL2A	methyltransferase like 2A [Source:HGNC Symbol;Acc:25755]	ENSG00000087995	ENSP00000309610
METTL2B	methyltransferase like 2B [Source:HGNC Symbol;Acc:18272]	ENSG00000165055	ENSP00000262432
ZNF326	zinc finger protein 326 [Source:HGNC Symbol;Acc:14104]	ENSG00000162664	ENSP00000403470
AKAP8	A kinase (PRKA) anchor protein 8 [Source:HGNC Symbol;Acc:378]	ENSG00000105127	ENSP00000269701
AKAP8L	A kinase (PRKA) anchor protein 8-like [Source:HGNC Symbol;Acc:29857]	ENSG00000011243	ENSP00000470952
RPS14	ribosomal protein S14 [Source:HGNC Symbol;Acc:10387]	ENSG00000164587	ENSP00000428536
ELAVL1	ELAV (embryonic lethal, abnormal vision, Drosophila)-like 1 (Hu antigen R) [Source:HGNC Symbol;Acc:3312]	ENSG00000066044	ENSP00000472197
ELAVL2	ELAV (embryonic lethal, abnormal vision, Drosophila)-like 2 (Hu antigen B) [Source:HGNC Symbol;Acc:3313]	ENSG00000107105	ENSP00000369460
ELAVL3	ELAV (embryonic lethal, abnormal vision, Drosophila)-like 3 (Hu antigen C) [Source:HGNC Symbol;Acc:3314]	ENSG00000196361	ENSP00000390878
ELAVL4	ELAV (embryonic lethal, abnormal vision, Drosophila)-like 4 [Source:HGNC Symbol;Acc:3315]	ENSG00000162374	ENSP00000399939
PNN	pinin, desmosome associated protein [Source:HGNC Symbol;Acc:9162]	ENSG00000100941	ENSP00000216832
DDX41	DEAD (Asp-Glu-Ala-Asp) box polypeptide 41 [Source:HGNC Symbol;Acc:18674]	ENSG00000183258	ENSP00000330349
TNPO2	transportin 2 [Source:HGNC Symbol;Acc:19998]	ENSG00000105576	ENSP00000397379
TNPO1	transportin 1 [Source:HGNC Symbol;Acc:6401]	ENSG00000083312	ENSP00000336712
PUSL1	pseudouridylate synthase-like 1 [Source:HGNC Symbol;Acc:26914]	ENSG00000169972	ENSP00000368318
RBM43	RNA binding motif protein 43 [Source:HGNC Symbol;Acc:24790]	ENSG00000184898	ENSP00000331211
ZGPAT	zinc finger, CCCH-type with G patch domain [Source:HGNC Symbol;Acc:15948]	ENSG00000197114	ENSP00000332013
SCAF11	SR-related CTD-associated factor 11 [Source:HGNC Symbol;Acc:10784]	ENSG00000139218	ENSP00000358374
USP39	ubiquitin specific peptidase 39 [Source:HGNC Symbol;Acc:20071]	ENSG00000168883	ENSP00000312981
RPL38	ribosomal protein L38 [Source:HGNC Symbol;Acc:10349]	ENSG00000172809	ENSP00000462580
NARS	asparaginyl-tRNA synthetase [Source:HGNC Symbol;Acc:7643]	ENSG00000134440	ENSP00000256854
RPS16	ribosomal protein S16 [Source:HGNC Symbol;Acc:10396]	ENSG00000105193	ENSP00000251453
CLASRP	CLK4-associating serine/arginine rich protein [Source:HGNC Symbol;Acc:17731]	ENSG00000104859	ENSP00000465562
RPS9	ribosomal protein S9 [Source:HGNC Symbol;Acc:10442]	ENSG00000170889	ENSP00000302896
TOP3B	topoisomerase (DNA) III beta [Source:HGNC Symbol;Acc:11993]	ENSG00000100038	ENSP00000349705
NCBP2L	nuclear cap binding protein subunit 2-like [Source:HGNC Symbol;Acc:31795]	ENSG00000170935	ENSP00000361454
NCBP2	nuclear cap binding protein subunit 2, 20kDa [Source:HGNC Symbol;Acc:7659]	ENSG00000114503	ENSP00000389315
SMG9	smg-9 homolog, nonsense mediated mRNA decay factor (C. elegans) [Source:HGNC Symbol;Acc:25763]	ENSG00000105771	ENSP00000270066
FTSJ2	FtsJ RNA methyltransferase homolog 2 (E. coli) [Source:HGNC Symbol;Acc:16352]	ENSG00000122687	ENSP00000392343
DDX56	DEAD (Asp-Glu-Ala-Asp) box helicase 56 [Source:HGNC Symbol;Acc:18193]	ENSG00000136271	ENSP00000258772
RBM28	RNA binding motif protein 28 [Source:HGNC Symbol;Acc:21863]	ENSG00000106344	ENSP00000223073
UTP11L	UTP11-like, U3 small nucleolar ribonucleoprotein, (yeast) [Source:HGNC Symbol;Acc:24329]	ENSG00000183520	ENSP00000362105
MRPS18B	mitochondrial ribosomal protein S18B [Source:HGNC Symbol;Acc:14516]	ENSG00000223775	ENSP00000402718
RPL14	ribosomal protein L14 [Source:HGNC Symbol;Acc:10305]	ENSG00000188846	ENSP00000379506
RPL37	ribosomal protein L37 [Source:HGNC Symbol;Acc:10347]	ENSG00000145592	ENSP00000422823
GEMIN5	gem (nuclear organelle) associated protein 5 [Source:HGNC Symbol;Acc:20043]	ENSG00000082516	ENSP00000285873
MKRN1	makorin ring finger protein 1 [Source:HGNC Symbol;Acc:7112]	ENSG00000133606	ENSP00000416369
MKRN2	makorin ring finger protein 2 [Source:HGNC Symbol;Acc:7113]	ENSG00000075975	ENSP00000170447
MKRN3	makorin ring finger protein 3 [Source:HGNC Symbol;Acc:7114]	ENSG00000179455	ENSP00000313881
NOA1	nitric oxide associated 1 [Source:HGNC Symbol;Acc:28473]	ENSG00000084092	ENSP00000264230
PINX1	PIN2/TERF1 interacting, telomerase inhibitor 1 [Source:HGNC Symbol;Acc:30046]	ENSG00000254093	ENSP00000318966
HRSP12	heat-responsive protein 12 [Source:HGNC Symbol;Acc:16897]	ENSG00000132541	ENSP00000428596
TDRD9	tudor domain containing 9 [Source:HGNC Symbol;Acc:20122]	ENSG00000156414	ENSP00000343545
DHX30	DEAH (Asp-Glu-Ala-His) box polypeptide 30 [Source:HGNC Symbol;Acc:16716]	ENSG00000132153	ENSP00000343442
DHX29	DEAH (Asp-Glu-Ala-His) box polypeptide 29 [Source:HGNC Symbol;Acc:15815]	ENSG00000067248	ENSP00000251636
DHX57	DEAH (Asp-Glu-Ala-Asp/His) box polypeptide 57 [Source:HGNC Symbol;Acc:20086]	ENSG00000163214	ENSP00000295373
YTHDC2	YTH domain containing 2 [Source:HGNC Symbol;Acc:24721]	ENSG00000047188	ENSP00000161863
DHX36	DEAH (Asp-Glu-Ala-His) box polypeptide 36 [Source:HGNC Symbol;Acc:14410]	ENSG00000174953	ENSP00000417078
DHX9	DEAH (Asp-Glu-Ala-His) box polypeptide 9 [Source:HGNC Symbol;Acc:2750]	ENSG00000135829	ENSP00000356520
EIF3G	eukaryotic translation initiation factor 3, subunit G [Source:HGNC Symbol;Acc:3274]	ENSG00000130811	ENSP00000466860
NOL10	nucleolar protein 10 [Source:HGNC Symbol;Acc:25862]	ENSG00000115761	ENSP00000263837
UTP15	UTP15, U3 small nucleolar ribonucleoprotein, homolog (S. cerevisiae) [Source:HGNC Symbol;Acc:25758]	ENSG00000164338	ENSP00000421669
GATC	glutamyl-tRNA(Gln) amidotransferase, subunit C [Source:HGNC Symbol;Acc:25068]	ENSG00000257218	ENSP00000446872
TCOF1	Treacher Collins-Franceschetti syndrome 1 [Source:HGNC Symbol;Acc:11654]	ENSG00000070814	ENSP00000409944
NONO	non-POU domain containing, octamer-binding [Source:HGNC Symbol;Acc:7871]	ENSG00000147140	ENSP00000441364
PSPC1	paraspeckle component 1 [Source:HGNC Symbol;Acc:20320]	ENSG00000121390	ENSP00000393069
SFPQ	splicing factor proline/glutamine-rich [Source:HGNC Symbol;Acc:10774]	ENSG00000116560	ENSP00000349748
NUDT21	nudix (nucleoside diphosphate linked moiety X)-type motif 21 [Source:HGNC Symbol;Acc:13870]	ENSG00000167005	ENSP00000300291
MRPL19	mitochondrial ribosomal protein L19 [Source:HGNC Symbol;Acc:14052]	ENSG00000115364	ENSP00000377486
URM1	ubiquitin related modifier 1 [Source:HGNC Symbol;Acc:28378]	ENSG00000167118	ENSP00000361941
MRPL53	mitochondrial ribosomal protein L53 [Source:HGNC Symbol;Acc:16684]	ENSG00000204822	ENSP00000258105
RBM48	RNA binding motif protein 48 [Source:HGNC Symbol;Acc:21785]	ENSG00000127993	ENSP00000419242
REPIN1	replication initiator 1 [Source:HGNC Symbol;Acc:17922]	ENSG00000214022	ENSP00000417291
ZC3H12B	zinc finger CCCH-type containing 12B [Source:HGNC Symbol;Acc:17407]	ENSG00000102053	ENSP00000408077
ZC3H12C	zinc finger CCCH-type containing 12C [Source:HGNC Symbol;Acc:29362]	ENSG00000149289	ENSP00000278590
ZC3H12D	zinc finger CCCH-type containing 12D [Source:HGNC Symbol;Acc:21175]	ENSG00000178199	ENSP00000374592
ZC3H12A	zinc finger CCCH-type containing 12A [Source:HGNC Symbol;Acc:26259]	ENSG00000163874	ENSP00000362179
TRMT5	tRNA methyltransferase 5 homolog (S. cerevisiae) [Source:HGNC Symbol;Acc:23141]	ENSG00000126814	ENSP00000261249
TRMT61A	tRNA methyltransferase 61 homolog A (S. cerevisiae) [Source:HGNC Symbol;Acc:23790]	ENSG00000166166	ENSP00000299202
PABPN1L	poly(A) binding protein, nuclear 1-like (cytoplasmic) [Source:HGNC Symbol;Acc:37237]	ENSG00000205022	ENSP00000408598
PABPN1	poly(A) binding protein, nuclear 1 [Source:HGNC Symbol;Acc:8565]	ENSG00000100836	ENSP00000216727
LSG1	large subunit GTPase 1 homolog (S. cerevisiae) [Source:HGNC Symbol;Acc:25652]	ENSG00000041802	ENSP00000265245
GNL1	guanine nucleotide binding protein-like 1 [Source:HGNC Symbol;Acc:4413]	ENSG00000206412	ENSP00000372942
EEF1G	eukaryotic translation elongation factor 1 gamma [Source:HGNC Symbol;Acc:3213]	ENSG00000254772	ENSP00000331901
RBM33	RNA binding motif protein 33 [Source:HGNC Symbol;Acc:27223]	ENSG00000184863	ENSP00000376510
RPP25	ribonuclease P/MRP 25kDa subunit [Source:HGNC Symbol;Acc:30361]	ENSG00000178718	ENSP00000317691
RPP25L	ribonuclease P/MRP 25kDa subunit-like [Source:HGNC Symbol;Acc:19909]	ENSG00000164967	ENSP00000297613
RPP38	ribonuclease P/MRP 38kDa subunit [Source:HGNC Symbol;Acc:30329]	ENSG00000152464	ENSP00000367443
GARS	glycyl-tRNA synthetase [Source:HGNC Symbol;Acc:4162]	ENSG00000106105	ENSP00000373918
DRG2	developmentally regulated GTP binding protein 2 [Source:HGNC Symbol;Acc:3030]	ENSG00000108591	ENSP00000225729
TRMU	tRNA 5-methylaminomethyl-2-thiouridylate methyltransferase [Source:HGNC Symbol;Acc:25481]	ENSG00000100416	ENSP00000370407
GNL2	guanine nucleotide binding protein-like 2 (nucleolar) [Source:HGNC Symbol;Acc:29925]	ENSG00000134697	ENSP00000362153
CPSF2	cleavage and polyadenylation specific factor 2, 100kDa [Source:HGNC Symbol;Acc:2325]	ENSG00000165934	ENSP00000298875
CD3EAP	CD3e molecule, epsilon associated protein [Source:HGNC Symbol;Acc:24219]	ENSG00000117877	ENSP00000310966
HDLBP	high density lipoprotein binding protein [Source:HGNC Symbol;Acc:4857]	ENSG00000115677	ENSP00000312042
RDM1	RAD52 motif 1 [Source:HGNC Symbol;Acc:19950]	ENSG00000187456	ENSP00000378035
BYSL	bystin-like [Source:HGNC Symbol;Acc:1157]	ENSG00000112578	ENSP00000230340
GEMIN8	gem (nuclear organelle) associated protein 8 [Source:HGNC Symbol;Acc:26044]	ENSG00000046647	ENSP00000369895
XPO5	exportin 5 [Source:HGNC Symbol;Acc:17675]	ENSG00000124571	ENSP00000265351
ZNF622	zinc finger protein 622 [Source:HGNC Symbol;Acc:30958]	ENSG00000173545	ENSP00000310042
DZIP1	DAZ interacting protein 1 [Source:HGNC Symbol;Acc:20908]	ENSG00000134874	ENSP00000257312
DZIP1L	DAZ interacting zinc finger protein 1-like [Source:HGNC Symbol;Acc:26551]	ENSG00000158163	ENSP00000332148
GSPT1	G1 to S phase transition 1 [Source:HGNC Symbol;Acc:4621]	ENSG00000103342	ENSP00000408399
HBS1L	HBS1-like (S. cerevisiae) [Source:HGNC Symbol;Acc:4834]	ENSG00000112339	ENSP00000389826
GSPT2	G1 to S phase transition 2 [Source:HGNC Symbol;Acc:4622]	ENSG00000268273	ENSP00000470900
EIF2D	eukaryotic translation initiation factor 2D [Source:HGNC Symbol;Acc:6583]	ENSG00000143486	ENSP00000271764
METTL1	methyltransferase like 1 [Source:HGNC Symbol;Acc:7030]	ENSG00000037897	ENSP00000314441
RNASEH1	ribonuclease H1 [Source:HGNC Symbol;Acc:18466]	ENSG00000171865	ENSP00000313350
ZNHIT6	zinc finger, HIT-type containing 6 [Source:HGNC Symbol;Acc:26089]	ENSG00000117174	ENSP00000414344
DARS2	aspartyl-tRNA synthetase 2, mitochondrial [Source:HGNC Symbol;Acc:25538]	ENSG00000117593	ENSP00000355086
SNRPD2	small nuclear ribonucleoprotein D2 polypeptide 16.5kDa [Source:HGNC Symbol;Acc:11159]	ENSG00000125743	ENSP00000468247
DICER1	dicer 1, ribonuclease type III [Source:HGNC Symbol;Acc:17098]	ENSG00000100697	ENSP00000437256
DYNLL1	dynein, light chain, LC8-type 1 [Source:HGNC Symbol;Acc:15476]	ENSG00000088986	ENSP00000376297
ZNF638	zinc finger protein 638 [Source:HGNC Symbol;Acc:17894]	ENSG00000075292	ENSP00000386433
SAMD4B	sterile alpha motif domain containing 4B [Source:HGNC Symbol;Acc:25492]	ENSG00000179134	ENSP00000317224
SAMD4A	sterile alpha motif domain containing 4A [Source:HGNC Symbol;Acc:23023] [Type: protein coding Ensembl/Havana merge]	ENSG00000020577	ENSP00000375919
RTF1	Rtf1, Paf1/RNA polymerase II complex component, homolog (S. cerevisiae) [Source:HGNC Symbol;Acc:28996]	ENSG00000137815	ENSP00000452973
CNOT4	CCR4-NOT transcription complex, subunit 4 [Source:HGNC Symbol;Acc:7880]	ENSG00000080802	ENSP00000388491
TARBP2	TAR (HIV-1) RNA binding protein 2 [Source:HGNC Symbol;Acc:11569]	ENSG00000139546	ENSP00000266987
PRKRA	protein kinase, interferon-inducible double stranded RNA dependent activator [Source:HGNC Symbol;Acc:9438]	ENSG00000180228	ENSP00000430604
GLE1	GLE1 RNA export mediator homolog (yeast) [Source:HGNC Symbol;Acc:4315]	ENSG00000119392	ENSP00000438670
EXOSC2	exosome component 2 [Source:HGNC Symbol;Acc:17097]	ENSG00000130713	ENSP00000361427
SSU72	SSU72 RNA polymerase II CTD phosphatase homolog (S. cerevisiae) [Source:HGNC Symbol;Acc:25016]	ENSG00000160075	ENSP00000291386
GTPBP10	GTP-binding protein 10 (putative) [Source:HGNC Symbol;Acc:25106]	ENSG00000105793	ENSP00000222511
RPL10A	ribosomal protein L10a [Source:HGNC Symbol;Acc:10299]	ENSG00000198755	ENSP00000363018
HENMT1	HEN1 methyltransferase homolog 1 (Arabidopsis) [Source:HGNC Symbol;Acc:26400] [Type: protein coding Ensembl/Havana merge]	ENSG00000162639	ENSP00000359049
THOC2	THO complex 2 [Source:HGNC Symbol;Acc:19073]	ENSG00000125676	ENSP00000347959
ENDOG	endonuclease G [Source:HGNC Symbol;Acc:3346]	ENSG00000167136	ENSP00000361725
EXOG	endo/exonuclease (5'-3'), endonuclease G-like [Source:HGNC Symbol;Acc:3347]	ENSG00000157036	ENSP00000350987
ASH1L	ash1 (absent, small, or homeotic)-like (Drosophila) [Source:HGNC Symbol;Acc:19088]	ENSG00000116539	ENSP00000357330
TRMT10C	tRNA methyltransferase 10 homolog C (S. cerevisiae) [Source:HGNC Symbol;Acc:26022]	ENSG00000174173	ENSP00000312356
TRMT10A	tRNA methyltransferase 10 homolog A (S. cerevisiae) [Source:HGNC Symbol;Acc:28403]	ENSG00000145331	ENSP00000423628
TRMT10B	tRNA methyltransferase 10 homolog B (S. cerevisiae) [Source:HGNC Symbol;Acc:26454]	ENSG00000165275	ENSP00000366982
MRPL33	mitochondrial ribosomal protein L33 [Source:HGNC Symbol;Acc:14487]	ENSG00000243147	ENSP00000296102
SSB	Sjogren syndrome antigen B (autoantigen La) [Source:HGNC Symbol;Acc:11316]	ENSG00000138385	ENSP00000260956
LARP7	La ribonucleoprotein domain family, member 7 [Source:HGNC Symbol;Acc:24912]	ENSG00000174720	ENSP00000422626
MRPL24	mitochondrial ribosomal protein L24 [Source:HGNC Symbol;Acc:14037]	ENSG00000143314	ENSP00000411369
RNASEK	ribonuclease, RNase K [Source:HGNC Symbol;Acc:33911]	ENSG00000219200	ENSP00000385440
PELO	pelota homolog (Drosophila) [Source:HGNC Symbol;Acc:8829]	ENSG00000152684	ENSP00000274311
QARS	glutaminyl-tRNA synthetase [Source:HGNC Symbol;Acc:9751]	ENSG00000172053	ENSP00000307567
IPO4	importin 4 [Source:HGNC Symbol;Acc:19426]	ENSG00000196497	ENSP00000346453
CAPRIN1	cell cycle associated protein 1 [Source:HGNC Symbol;Acc:6743]	ENSG00000135387	ENSP00000374296
CAPRIN2	caprin family member 2 [Source:HGNC Symbol;Acc:21259]	ENSG00000110888	ENSP00000251071
PNLDC1	poly(A)-specific ribonuclease (PARN)-like domain containing 1 [Source:HGNC Symbol;Acc:21185]	ENSG00000146453	ENSP00000275275
PARN	poly(A)-specific ribonuclease [Source:HGNC Symbol;Acc:8609]	ENSG00000140694	ENSP00000444381
TIAL1	TIA1 cytotoxic granule-associated RNA binding protein-like 1 [Source:HGNC Symbol;Acc:11804]	ENSG00000151923	ENSP00000394902
TIA1	TIA1 cytotoxic granule-associated RNA binding protein [Source:HGNC Symbol;Acc:11802]	ENSG00000116001	ENSP00000282574
CDC40	cell division cycle 40 homolog (S. cerevisiae) [Source:HGNC Symbol;Acc:17350]	ENSG00000168438	ENSP00000357928
ZNF598	zinc finger protein 598 [Source:HGNC Symbol;Acc:28079]	ENSG00000167962	ENSP00000455882
RCL1	RNA terminal phosphate cyclase-like 1 [Source:HGNC Symbol;Acc:17687]	ENSG00000120158	ENSP00000412000
RTCA	RNA 3'-terminal phosphate cyclase [Source:HGNC Symbol;Acc:17981]	ENSG00000137996	ENSP00000359146
MRPL38	mitochondrial ribosomal protein L38 [Source:HGNC Symbol;Acc:14033]	ENSG00000204316	ENSP00000308275
ADAT2	adenosine deaminase, tRNA-specific 2 [Source:HGNC Symbol;Acc:21172]	ENSG00000189007	ENSP00000237283
BOP1	block of proliferation 1 [Source:HGNC Symbol;Acc:15519]	ENSG00000261236	ENSP00000455106
U2SURP	U2 snRNP-associated SURP domain containing [Source:HGNC Symbol;Acc:30855]	ENSG00000163714	ENSP00000422011
DUS3L	dihydrouridine synthase 3-like (S. cerevisiae) [Source:HGNC Symbol;Acc:26920]	ENSG00000141994	ENSP00000311977
CSTF3	cleavage stimulation factor, 3' pre-RNA, subunit 3, 77kDa [Source:HGNC Symbol;Acc:2485]	ENSG00000176102	ENSP00000315791
SRSF11	serine/arginine-rich splicing factor 11 [Source:HGNC Symbol;Acc:10782]	ENSG00000116754	ENSP00000378568
SREK1	splicing regulatory glutamine/lysine-rich protein 1 [Source:HGNC Symbol;Acc:17882]	ENSG00000153914	ENSP00000334538
POLR1E	polymerase (RNA) I polypeptide E, 53kDa [Source:HGNC Symbol;Acc:17631]	ENSG00000137054	ENSP00000367029
EXOSC7	exosome component 7 [Source:HGNC Symbol;Acc:28112]	ENSG00000075914	ENSP00000265564
EXOSC8	exosome component 8 [Source:HGNC Symbol;Acc:17035]	ENSG00000120699	ENSP00000374354
EXOSC9	exosome component 9 [Source:HGNC Symbol;Acc:9137]	ENSG00000123737	ENSP00000243498
MRPL12	mitochondrial ribosomal protein L12 [Source:HGNC Symbol;Acc:10378]	ENSG00000262814	ENSP00000333837
RPS28	ribosomal protein S28 [Source:HGNC Symbol;Acc:10418]	ENSG00000233927	ENSP00000472469
TEFM	transcription elongation factor, mitochondrial [Source:HGNC Symbol;Acc:26223]	ENSG00000172171	ENSP00000462963
RPL12	ribosomal protein L12 [Source:HGNC Symbol;Acc:10302]	ENSG00000197958	ENSP00000354739
ZC3H3	zinc finger CCCH-type containing 3 [Source:HGNC Symbol;Acc:28972]	ENSG00000014164	ENSP00000262577
EIF6	eukaryotic translation initiation factor 6 [Source:HGNC Symbol;Acc:6159]	ENSG00000242372	ENSP00000363574
NELFE	negative elongation factor complex member E [Source:HGNC Symbol;Acc:13974]	ENSG00000206268	ENSP00000407528
EIF2B3	eukaryotic translation initiation factor 2B, subunit 3 gamma, 58kDa [Source:HGNC Symbol;Acc:3259] [Type: protein coding Ensembl/Havana merge]	ENSG00000070785	ENSP00000353575
APOBEC2	apolipoprotein B mRNA editing enzyme, catalytic polypeptide-like 2 [Source:HGNC Symbol;Acc:605]	ENSG00000124701	ENSP00000244669
APOBEC3H	apolipoprotein B mRNA editing enzyme, catalytic polypeptide-like 3H [Source:HGNC Symbol;Acc:24100]	ENSG00000100298	ENSP00000216123
APOBEC3F	apolipoprotein B mRNA editing enzyme, catalytic polypeptide-like 3F [Source:HGNC Symbol;Acc:17356]	ENSG00000128394	ENSP00000309749
APOBEC3G	apolipoprotein B mRNA editing enzyme, catalytic polypeptide-like 3G [Source:HGNC Symbol;Acc:17357]	ENSG00000239713	ENSP00000385057
APOBEC1	apolipoprotein B mRNA editing enzyme, catalytic polypeptide 1 [Source:HGNC Symbol;Acc:604]	ENSG00000111701	ENSP00000229304
ZC3H7A	zinc finger CCCH-type containing 7A [Source:HGNC Symbol;Acc:30959]	ENSG00000122299	ENSP00000347999
ZC3H7B	zinc finger CCCH-type containing 7B [Source:HGNC Symbol;Acc:30869]	ENSG00000100403	ENSP00000263243
NOP9	NOP9 nucleolar protein homolog (yeast) [Source:HGNC Symbol;Acc:19826]	ENSG00000196943	ENSP00000267425
PQBP1	polyglutamine binding protein 1 [Source:HGNC Symbol;Acc:9330]	ENSG00000102103	ENSP00000218224
PATL2	protein associated with topoisomerase II homolog 2 (yeast) [Source:HGNC Symbol;Acc:33630]	ENSG00000229474	ENSP00000416673
PATL1	protein associated with topoisomerase II homolog 1 (yeast) [Source:HGNC Symbol;Acc:26721]	ENSG00000166889	ENSP00000300146
EDC3	enhancer of mRNA decapping 3 homolog (S. cerevisiae) [Source:HGNC Symbol;Acc:26114]	ENSG00000179151	ENSP00000455580
WBP4	WW domain binding protein 4 [Source:HGNC Symbol;Acc:12739]	ENSG00000120688	ENSP00000439301
GLTSCR2	glioma tumor suppressor candidate region gene 2 [Source:HGNC Symbol;Acc:4333]	ENSG00000105373	ENSP00000470263
RPS18	ribosomal protein S18 [Source:HGNC Symbol;Acc:10401]	ENSG00000226225	ENSP00000403175
ASCC1	activating signal cointegrator 1 complex subunit 1 [Source:HGNC Symbol;Acc:24268]	ENSG00000138303	ENSP00000378373
EIF5A	eukaryotic translation initiation factor 5A [Source:HGNC Symbol;Acc:3300]	ENSG00000132507	ENSP00000460284
EIF5A2	eukaryotic translation initiation factor 5A2 [Source:HGNC Symbol;Acc:3301]	ENSG00000163577	ENSP00000417133
EIF5AL1	eukaryotic translation initiation factor 5A-like 1 [Source:HGNC Symbol;Acc:17419]	ENSG00000253626	ENSP00000430706
MRPL47	mitochondrial ribosomal protein L47 [Source:HGNC Symbol;Acc:16652]	ENSG00000136522	ENSP00000376427
BOLL	bol, boule-like (Drosophila) [Source:HGNC Symbol;Acc:14273]	ENSG00000152430	ENSP00000397711
DAZL	deleted in azoospermia-like [Source:HGNC Symbol;Acc:2685]	ENSG00000092345	ENSP00000398109
DAZ1	deleted in azoospermia 1 [Source:HGNC Symbol;Acc:2682]	ENSG00000188120	ENSP00000371950
DAZ2	deleted in azoospermia 2 [Source:HGNC Symbol;Acc:15964]	ENSG00000205944	ENSP00000371871
DAZ3	deleted in azoospermia 3 [Source:HGNC Symbol;Acc:15965]	ENSG00000187191	ENSP00000401049
DAZ4	deleted in azoospermia 4 [Source:HGNC Symbol;Acc:15966]	ENSG00000205916	ENSP00000401363
INTS1	integrator complex subunit 1 [Source:HGNC Symbol;Acc:24555]	ENSG00000164880	ENSP00000385722
RPLP1	ribosomal protein, large, P1 [Source:HGNC Symbol;Acc:10372]	ENSG00000137818	ENSP00000346037
MRPS11	mitochondrial ribosomal protein S11 [Source:HGNC Symbol;Acc:14050]	ENSG00000181991	ENSP00000317376
WDR43	WD repeat domain 43 [Source:HGNC Symbol;Acc:28945]	ENSG00000163811	ENSP00000384302
TRMT112	tRNA methyltransferase 11-2 homolog (S. cerevisiae) [Source:HGNC Symbol;Acc:26940]	ENSG00000173113	ENSP00000309433
PPP1R8	protein phosphatase 1, regulatory subunit 8 [Source:HGNC Symbol;Acc:9296]	ENSG00000117751	ENSP00000311677
FBXO17	F-box protein 17 [Source:HGNC Symbol;Acc:18754]	ENSG00000104835	ENSP00000292852
MTHFSD	methenyltetrahydrofolate synthetase domain containing [Source:HGNC Symbol;Acc:25778]	ENSG00000103248	ENSP00000370612
SON	SON DNA binding protein [Source:HGNC Symbol;Acc:11183]	ENSG00000159140	ENSP00000348984
SPATS2L	spermatogenesis associated, serine-rich 2-like [Source:HGNC Symbol;Acc:24574]	ENSG00000196141	ENSP00000405751
SPATS2	spermatogenesis associated, serine-rich 2 [Source:HGNC Symbol;Acc:18650]	ENSG00000123352	ENSP00000326841
MAEL	maelstrom spermatogenic transposon silencer [Source:HGNC Symbol;Acc:25929]	ENSG00000143194	ENSP00000356846
RRP1B	ribosomal RNA processing 1 homolog B (S. cerevisiae) [Source:HGNC Symbol;Acc:23818]	ENSG00000160208	ENSP00000339145
RRP1	ribosomal RNA processing 1 homolog (S. cerevisiae) [Source:HGNC Symbol;Acc:18785]	ENSG00000160214	ENSP00000417464
ZC3HAV1	zinc finger CCCH-type, antiviral 1 [Source:HGNC Symbol;Acc:23721]	ENSG00000105939	ENSP00000418385
PARP12	poly (ADP-ribose) polymerase family, member 12 [Source:HGNC Symbol;Acc:21919]	ENSG00000059378	ENSP00000263549
TIPARP	TCDD-inducible poly(ADP-ribose) polymerase [Source:HGNC Symbol;Acc:23696]	ENSG00000163659	ENSP00000420141
MRPS17	mitochondrial ribosomal protein S17 [Source:HGNC Symbol;Acc:14047]	ENSG00000239789	ENSP00000401349
U2AF2	U2 small nuclear RNA auxiliary factor 2 [Source:HGNC Symbol;Acc:23156]	ENSG00000063244	ENSP00000307863
UHMK1	U2AF homology motif (UHM) kinase 1 [Source:HGNC Symbol;Acc:19683]	ENSG00000152332	ENSP00000420270
NUP153	nucleoporin 153kDa [Source:HGNC Symbol;Acc:8062]	ENSG00000124789	ENSP00000262077
CSDE1	cold shock domain containing E1, RNA-binding [Source:HGNC Symbol;Acc:29905]	ENSG00000009307	ENSP00000407724
POLR2L	polymerase (RNA) II (DNA directed) polypeptide L, 7.6kDa [Source:HGNC Symbol;Acc:9199]	ENSG00000177700	ENSP00000324124
NKRF	NFKB repressing factor [Source:HGNC Symbol;Acc:19374]	ENSG00000186416	ENSP00000442308
MRPL48	mitochondrial ribosomal protein L48 [Source:HGNC Symbol;Acc:16653]	ENSG00000175581	ENSP00000399076
XRCC6	X-ray repair complementing defective repair in Chinese hamster cells 6 [Source:HGNC Symbol;Acc:4055]	ENSG00000196419	ENSP00000403679
SUPT5H	suppressor of Ty 5 homolog (S. cerevisiae) [Source:HGNC Symbol;Acc:11469]	ENSG00000196235	ENSP00000469090
TSR3	TSR3, 20S rRNA accumulation, homolog (S. cerevisiae) [Source:HGNC Symbol;Acc:14175]	ENSG00000007520	ENSP00000007390
XRN2	5'-3' exoribonuclease 2 [Source:HGNC Symbol;Acc:12836]	ENSG00000088930	ENSP00000413548
RSRC1	arginine/serine-rich coiled-coil 1 [Source:HGNC Symbol;Acc:24152]	ENSG00000174891	ENSP00000295930
TDRD5	tudor domain containing 5 [Source:HGNC Symbol;Acc:20614]	ENSG00000162782	ENSP00000406052
POLR2J	polymerase (RNA) II (DNA directed) polypeptide J, 13.3kDa [Source:HGNC Symbol;Acc:9197]	ENSG00000005075	ENSP00000292614
POLR2J2	DNA-directed RNA polymerase II subunit RPB11-b1 [Source:RefSeq peptide;Acc:NP_116581]	ENSG00000228049	ENSP00000466522
POLR2J3	polymerase (RNA) II (DNA directed) polypeptide J3 [Source:HGNC Symbol;Acc:33853]	ENSG00000168255	ENSP00000368662
SAFB2	scaffold attachment factor B2 [Source:HGNC Symbol;Acc:21605]	ENSG00000130254	ENSP00000252542
SAFB	scaffold attachment factor B [Source:HGNC Symbol;Acc:10520]	ENSG00000160633	ENSP00000292123
SLTM	SAFB-like, transcription modulator [Source:HGNC Symbol;Acc:20709]	ENSG00000137776	ENSP00000369887
BRIX1	BRX1, biogenesis of ribosomes, homolog (S. cerevisiae) [Source:HGNC Symbol;Acc:24170]	ENSG00000113460	ENSP00000338862
POLR2I	polymerase (RNA) II (DNA directed) polypeptide I, 14.5kDa [Source:HGNC Symbol;Acc:9196]	ENSG00000105258	ENSP00000221859
PWP2	PWP2 periodic tryptophan protein homolog (yeast) [Source:HGNC Symbol;Acc:9711]	ENSG00000241945	ENSP00000291576
ELAC2	elaC homolog 2 (E. coli) [Source:HGNC Symbol;Acc:14198]	ENSG00000006744	ENSP00000337445
ZCCHC14	zinc finger, CCHC domain containing 14 [Source:HGNC Symbol;Acc:24134]	ENSG00000140948	ENSP00000268616
ZCCHC2	zinc finger, CCHC domain containing 2 [Source:HGNC Symbol;Acc:22916]	ENSG00000141664	ENSP00000464791
LARS	leucyl-tRNA synthetase [Source:HGNC Symbol;Acc:6512]	ENSG00000133706	ENSP00000426005
MRPL28	mitochondrial ribosomal protein L28 [Source:HGNC Symbol;Acc:14484]	ENSG00000086504	ENSP00000395305
CNOT1	CCR4-NOT transcription complex, subunit 1 [Source:HGNC Symbol;Acc:7877]	ENSG00000125107	ENSP00000455635
DDX18	DEAD (Asp-Glu-Ala-Asp) box polypeptide 18 [Source:HGNC Symbol;Acc:2741]	ENSG00000088205	ENSP00000263239
TSEN15	tRNA splicing endonuclease 15 homolog (S. cerevisiae) [Source:HGNC Symbol;Acc:16791]	ENSG00000198860	ENSP00000402002
USP10	ubiquitin specific peptidase 10 [Source:HGNC Symbol;Acc:12608]	ENSG00000103194	ENSP00000219473
SMNDC1	survival motor neuron domain containing 1 [Source:HGNC Symbol;Acc:16900]	ENSG00000119953	ENSP00000358605
THUMPD2	THUMP domain containing 2 [Source:HGNC Symbol;Acc:14890]	ENSG00000138050	ENSP00000423933
THUMPD3	THUMP domain containing 3 [Source:HGNC Symbol;Acc:24493]	ENSG00000134077	ENSP00000339532
SND1	staphylococcal nuclease and tudor domain containing 1 [Source:HGNC Symbol;Acc:30646]	ENSG00000197157	ENSP00000346762
LSM4	LSM4 homolog, U6 small nuclear RNA associated (S. cerevisiae) [Source:HGNC Symbol;Acc:17259]	ENSG00000130520	ENSP00000469468
EIF3M	eukaryotic translation initiation factor 3, subunit M [Source:HGNC Symbol;Acc:24460]	ENSG00000149100	ENSP00000436049
MRPL34	mitochondrial ribosomal protein L34 [Source:HGNC Symbol;Acc:14488]	ENSG00000130312	ENSP00000472266
SRP72	signal recognition particle 72kDa [Source:HGNC Symbol;Acc:11303]	ENSG00000174780	ENSP00000342181
SUGP1	SURP and G patch domain containing 1 [Source:HGNC Symbol;Acc:18643]	ENSG00000105705	ENSP00000247001
SUGP2	SURP and G patch domain containing 2 [Source:HGNC Symbol;Acc:18641]	ENSG00000064607	ENSP00000409603
RPS3	ribosomal protein S3 [Source:HGNC Symbol;Acc:10420]	ENSG00000149273	ENSP00000433421
RPS27A	ribosomal protein S27a [Source:HGNC Symbol;Acc:10417]	ENSG00000143947	ENSP00000272317
CCAR2	KIAA1967 [Source:HGNC Symbol;Acc:23360]	ENSG00000158941	ENSP00000373930
CCAR1	cell division cycle and apoptosis regulator 1 [Source:HGNC Symbol;Acc:24236]	ENSG00000060339	ENSP00000439252
DDX49	DEAD (Asp-Glu-Ala-Asp) box polypeptide 49 [Source:HGNC Symbol;Acc:18684]	ENSG00000105671	ENSP00000395377
MRPL4	mitochondrial ribosomal protein L4 [Source:HGNC Symbol;Acc:14276]	ENSG00000105364	ENSP00000377334
SFSWAP	splicing factor, suppressor of white-apricot homolog (Drosophila) [Source:HGNC Symbol;Acc:10790]	ENSG00000061936	ENSP00000437738
MRPS12	mitochondrial ribosomal protein S12 [Source:HGNC Symbol;Acc:10380]	ENSG00000128626	ENSP00000384952
EIF1	eukaryotic translation initiation factor 1 [Source:HGNC Symbol;Acc:3249]	ENSG00000173812	ENSP00000467918
EIF1B	eukaryotic translation initiation factor 1B [Source:HGNC Symbol;Acc:30792]	ENSG00000114784	ENSP00000232905
CLP1	cleavage and polyadenylation factor I subunit 1 [Source:HGNC Symbol;Acc:16999]	ENSG00000172409	ENSP00000434995
ZMAT5	zinc finger, matrin-type 5 [Source:HGNC Symbol;Acc:28046]	ENSG00000100319	ENSP00000344241
SF3B3	splicing factor 3b, subunit 3, 130kDa [Source:HGNC Symbol;Acc:10770]	ENSG00000189091	ENSP00000305790
PLD6	phospholipase D family, member 6 [Source:HGNC Symbol;Acc:30447]	ENSG00000179598	ENSP00000317177
QTRTD1	queuine tRNA-ribosyltransferase domain containing 1 [Source:HGNC Symbol;Acc:25771]	ENSG00000151576	ENSP00000281273
QTRT1	queuine tRNA-ribosyltransferase 1 [Source:HGNC Symbol;Acc:23797]	ENSG00000213339	ENSP00000465974
PIH1D1	PIH1 domain containing 1 [Source:HGNC Symbol;Acc:26075]	ENSG00000104872	ENSP00000469087
SWT1	SWT1 RNA endoribonuclease homolog (S. cerevisiae) [Source:HGNC Symbol;Acc:16785]	ENSG00000116668	ENSP00000356471
EXOSC4	exosome component 4 [Source:HGNC Symbol;Acc:18189]	ENSG00000178896	ENSP00000315476
EXOSC6	exosome component 6 [Source:HGNC Symbol;Acc:19055]	ENSG00000223496	ENSP00000398597
PTRH1	peptidyl-tRNA hydrolase 1 homolog (S. cerevisiae) [Source:HGNC Symbol;Acc:27039]	ENSG00000187024	ENSP00000439469
INTS8	integrator complex subunit 8 [Source:HGNC Symbol;Acc:26048]	ENSG00000164941	ENSP00000430338
EXOSC10	exosome component 10 [Source:HGNC Symbol;Acc:9138]	ENSG00000171824	ENSP00000307307
CASC3	cancer susceptibility candidate 3 [Source:HGNC Symbol;Acc:17040]	ENSG00000108349	ENSP00000264645
GTF3A	general transcription factor IIIA [Source:HGNC Symbol;Acc:4662]	ENSG00000122034	ENSP00000370532
MRPL54	mitochondrial ribosomal protein L54 [Source:HGNC Symbol;Acc:16685]	ENSG00000183617	ENSP00000331849
GTPBP3	GTP binding protein 3 (mitochondrial) [Source:HGNC Symbol;Acc:14880]	ENSG00000130299	ENSP00000313818
UBA1	ubiquitin-like modifier activating enzyme 1 [Source:HGNC Symbol;Acc:12469]	ENSG00000130985	ENSP00000366568
LSM12	LSM12 homolog (S. cerevisiae) [Source:HGNC Symbol;Acc:26407]	ENSG00000161654	ENSP00000293406
HINT3	histidine triad nucleotide binding protein 3 [Source:HGNC Symbol;Acc:18468]	ENSG00000111911	ENSP00000229633
CCDC59	coiled-coil domain containing 59 [Source:HGNC Symbol;Acc:25005]	ENSG00000133773	ENSP00000256151
POLDIP3	polymerase (DNA-directed), delta interacting protein 3 [Source:HGNC Symbol;Acc:23782]	ENSG00000100227	ENSP00000252116
RPL32	ribosomal protein L32 [Source:HGNC Symbol;Acc:10336]	ENSG00000144713	ENSP00000339064
AZGP1	alpha-2-glycoprotein 1, zinc-binding [Source:HGNC Symbol;Acc:910]	ENSG00000160862	ENSP00000292401
EMG1	Ribosomal RNA small subunit methyltransferase NEP1 [Source:UniProtKB/Swiss-Prot;Acc:Q92979]	ENSG00000268439	ENSP00000470560
C17orf85	chromosome 17 open reading frame 85 [Source:HGNC Symbol;Acc:24612]	ENSG00000074356	ENSP00000373657
N4BP1	NEDD4 binding protein 1 [Source:HGNC Symbol;Acc:29850]	ENSG00000102921	ENSP00000262384
NYNRIN	NYN domain and retroviral integrase containing [Source:HGNC Symbol;Acc:20165]	ENSG00000205978	ENSP00000371994
KHNYN	KH and NYN domain containing [Source:HGNC Symbol;Acc:20166]	ENSG00000100441	ENSP00000450799
NOP2	NOP2 nucleolar protein [Source:HGNC Symbol;Acc:7867]	ENSG00000111641	ENSP00000371858
NSUN4	NOP2/Sun domain family, member 4 [Source:HGNC Symbol;Acc:31802]	ENSG00000117481	ENSP00000437758
NSUN3	NOP2/Sun domain family, member 3 [Source:HGNC Symbol;Acc:26208]	ENSG00000178694	ENSP00000318986
NSUN6	NOP2/Sun domain family, member 6 [Source:HGNC Symbol;Acc:23529]	ENSG00000241058	ENSP00000366519
PAN2	PAN2 poly(A) specific ribonuclease subunit homolog (S. cerevisiae) [Source:HGNC Symbol;Acc:20074]	ENSG00000135473	ENSP00000257931
ZCCHC9	zinc finger, CCHC domain containing 9 [Source:HGNC Symbol;Acc:25424]	ENSG00000131732	ENSP00000369546
RRP9	ribosomal RNA processing 9, small subunit (SSU) processome component, homolog (yeast) [Source:HGNC Symbol;Acc:16829]	ENSG00000114767	ENSP00000232888
TNRC6A	trinucleotide repeat containing 6A [Source:HGNC Symbol;Acc:11969]	ENSG00000090905	ENSP00000326900
TNRC6B	trinucleotide repeat containing 6B [Source:HGNC Symbol;Acc:29190]	ENSG00000100354	ENSP00000384795
TNRC6C	trinucleotide repeat containing 6C [Source:HGNC Symbol;Acc:29318]	ENSG00000078687	ENSP00000440310
RP9	retinitis pigmentosa 9 (autosomal dominant) [Source:HGNC Symbol;Acc:10288]	ENSG00000164610	ENSP00000297157
MRPL15	mitochondrial ribosomal protein L15 [Source:HGNC Symbol;Acc:14054]	ENSG00000137547	ENSP00000428581
NGDN	neuroguidin, EIF4E binding protein [Source:HGNC Symbol;Acc:20271]	ENSG00000129460	ENSP00000380340
LSM10	LSM10, U7 small nuclear RNA associated [Source:HGNC Symbol;Acc:17562]	ENSG00000181817	ENSP00000319341
PUS1	pseudouridylate synthase 1 [Source:HGNC Symbol;Acc:15508]	ENSG00000177192	ENSP00000400032
MAK16	MAK16 homolog (S. cerevisiae) [Source:HGNC Symbol;Acc:13703]	ENSG00000198042	ENSP00000353246
RPS13	ribosomal protein S13 [Source:HGNC Symbol;Acc:10386]	ENSG00000110700	ENSP00000435777
SNRNP200	small nuclear ribonucleoprotein 200kDa (U5) [Source:HGNC Symbol;Acc:30859]	ENSG00000144028	ENSP00000317123
PRDX1	peroxiredoxin 1 [Source:HGNC Symbol;Acc:9352]	ENSG00000117450	ENSP00000262746
TSN	translin [Source:HGNC Symbol;Acc:12379]	ENSG00000211460	ENSP00000399735
NUFIP2	nuclear fragile X mental retardation protein interacting protein 2 [Source:HGNC Symbol;Acc:17634]	ENSG00000108256	ENSP00000225388
RBM19	RNA binding motif protein 19 [Source:HGNC Symbol;Acc:29098]	ENSG00000122965	ENSP00000442053
TDRKH	tudor and KH domain containing [Source:HGNC Symbol;Acc:11713]	ENSG00000182134	ENSP00000357812
NOP58	NOP58 ribonucleoprotein [Source:HGNC Symbol;Acc:29926]	ENSG00000055044	ENSP00000264279
RBM6	RNA binding motif protein 6 [Source:HGNC Symbol;Acc:9903]	ENSG00000004534	ENSP00000266022
RBM10	RNA binding motif protein 10 [Source:HGNC Symbol;Acc:9896]	ENSG00000182872	ENSP00000328848
RBM5	RNA binding motif protein 5 [Source:HGNC Symbol;Acc:9902]	ENSG00000003756	ENSP00000343054
RBM44	RNA binding motif protein 44 [Source:HGNC Symbol;Acc:24756]	ENSG00000177483	ENSP00000321179
OASL	2'-5'-oligoadenylate synthetase-like [Source:HGNC Symbol;Acc:8090]	ENSG00000135114	ENSP00000257570
OAS1	2'-5'-oligoadenylate synthetase 1, 40/46kDa [Source:HGNC Symbol;Acc:8086]	ENSG00000089127	ENSP00000448790
OAS2	2'-5'-oligoadenylate synthetase 2, 69/71kDa [Source:HGNC Symbol;Acc:8087]	ENSG00000111335	ENSP00000376362
OAS3	2'-5'-oligoadenylate synthetase 3, 100kDa [Source:HGNC Symbol;Acc:8088]	ENSG00000111331	ENSP00000228928
SF3A3	splicing factor 3a, subunit 3, 60kDa [Source:HGNC Symbol;Acc:10767]	ENSG00000183431	ENSP00000362110
NOC3L	nucleolar complex associated 3 homolog (S. cerevisiae) [Source:HGNC Symbol;Acc:24034]	ENSG00000173145	ENSP00000360401
MYEF2	myelin expression factor 2 [Source:HGNC Symbol;Acc:17940]	ENSG00000104177	ENSP00000267836
HNRNPM	heterogeneous nuclear ribonucleoprotein M [Source:HGNC Symbol;Acc:5046]	ENSG00000099783	ENSP00000325376
C11orf68	chromosome 11 open reading frame 68 [Source:HGNC Symbol;Acc:28801]	ENSG00000175573	ENSP00000398350
MRPL10	mitochondrial ribosomal protein L10 [Source:HGNC Symbol;Acc:14055]	ENSG00000159111	ENSP00000324100
RNASE10	ribonuclease, RNase A family, 10 (non-active) [Source:HGNC Symbol;Acc:19275]	ENSG00000182545	ENSP00000392996
CALR	calreticulin [Source:HGNC Symbol;Acc:1455]	ENSG00000179218	ENSP00000465105
CANX	calnexin [Source:HGNC Symbol;Acc:1473]	ENSG00000127022	ENSP00000391646
CALR3	calreticulin 3 [Source:HGNC Symbol;Acc:20407]	ENSG00000269058	ENSP00000269881
RPP14	ribonuclease P/MRP 14kDa subunit [Source:HGNC Symbol;Acc:30327]	ENSG00000163684	ENSP00000412894
RPS8	ribosomal protein S8 [Source:HGNC Symbol;Acc:10441]	ENSG00000142937	ENSP00000379888
PDCD7	programmed cell death 7 [Source:HGNC Symbol;Acc:8767]	ENSG00000090470	ENSP00000204549
RPS19BP1	ribosomal protein S19 binding protein 1 [Source:HGNC Symbol;Acc:28749]	ENSG00000187051	ENSP00000333948
TRMT6	tRNA methyltransferase 6 homolog (S. cerevisiae) [Source:HGNC Symbol;Acc:20900]	ENSG00000089195	ENSP00000203001
RPL4	ribosomal protein L4 [Source:HGNC Symbol;Acc:10353]	ENSG00000174444	ENSP00000454281
PRPF3	PRP3 pre-mRNA processing factor 3 homolog (S. cerevisiae) [Source:HGNC Symbol;Acc:17348]	ENSG00000265228	ENSP00000463374
RARS	arginyl-tRNA synthetase [Source:HGNC Symbol;Acc:9870]	ENSG00000113643	ENSP00000231572
RARS2	arginyl-tRNA synthetase 2, mitochondrial [Source:HGNC Symbol;Acc:21406]	ENSG00000146282	ENSP00000389656
APOBEC4	apolipoprotein B mRNA editing enzyme, catalytic polypeptide-like 4 (putative) [Source:HGNC Symbol;Acc:32152]	ENSG00000173627	ENSP00000310622
ZCCHC24	zinc finger, CCHC domain containing 24 [Source:HGNC Symbol;Acc:26911]	ENSG00000165424	ENSP00000361411
RPS21	ribosomal protein S21 [Source:HGNC Symbol;Acc:10409]	ENSG00000171858	ENSP00000388332
DDX24	DEAD (Asp-Glu-Ala-Asp) box polypeptide 24 [Source:HGNC Symbol;Acc:13266]	ENSG00000089737	ENSP00000452145
RTCB	chromosome 22 open reading frame 28 [Source:HGNC Symbol;Acc:26935]	ENSG00000100220	ENSP00000216038
MBNL2	muscleblind-like splicing regulator 2 [Source:HGNC Symbol;Acc:16746]	ENSG00000139793	ENSP00000267287
MBNL3	muscleblind-like splicing regulator 3 [Source:HGNC Symbol;Acc:20564]	ENSG00000076770	ENSP00000359890
MBNL1	muscleblind-like splicing regulator 1 [Source:HGNC Symbol;Acc:6923]	ENSG00000152601	ENSP00000420327
ALYREF	Aly/REF export factor [Source:HGNC Symbol;Acc:19071]	ENSG00000183684	ENSP00000421592
LSMD1	LSM domain containing 1 [Source:HGNC Symbol;Acc:28212]	ENSG00000183011	ENSP00000335611
PUS7	pseudouridylate synthase 7 homolog (S. cerevisiae) [Source:HGNC Symbol;Acc:26033]	ENSG00000091127	ENSP00000417718
PUS7L	pseudouridylate synthase 7 homolog (S. cerevisiae)-like [Source:HGNC Symbol;Acc:25276]	ENSG00000129317	ENSP00000446865
MRPS24	mitochondrial ribosomal protein S24 [Source:HGNC Symbol;Acc:14510]	ENSG00000062582	ENSP00000318158
RBBP6	retinoblastoma binding protein 6 [Source:HGNC Symbol;Acc:9889]	ENSG00000122257	ENSP00000317872
RPL19	ribosomal protein L19 [Source:HGNC Symbol;Acc:10312]	ENSG00000108298	ENSP00000225430
NOL3	nucleolar protein 3 (apoptosis repressor with CARD domain) [Source:HGNC Symbol;Acc:7869]	ENSG00000140939	ENSP00000399831
RPS27	ribosomal protein S27 [Source:HGNC Symbol;Acc:10416]	ENSG00000177954	ENSP00000357555
RPS27L	ribosomal protein S27-like [Source:HGNC Symbol;Acc:18476]	ENSG00000185088	ENSP00000412026
PTRF	polymerase I and transcript release factor [Source:HGNC Symbol;Acc:9688]	ENSG00000177469	ENSP00000349541
MRPS18A	mitochondrial ribosomal protein S18A [Source:HGNC Symbol;Acc:14515]	ENSG00000096080	ENSP00000361188
SLBP	stem-loop binding protein [Source:HGNC Symbol;Acc:10904]	ENSG00000163950	ENSP00000316490
EARS2	glutamyl-tRNA synthetase 2, mitochondrial [Source:HGNC Symbol;Acc:29419]	ENSG00000103356	ENSP00000456467
SMAD1	SMAD family member 1 [Source:HGNC Symbol;Acc:6767]	ENSG00000170365	ENSP00000426568
SMAD2	SMAD family member 2 [Source:HGNC Symbol;Acc:6768]	ENSG00000175387	ENSP00000384449
SMAD5	SMAD family member 5 [Source:HGNC Symbol;Acc:6771]	ENSG00000113658	ENSP00000441954
SMAD9	SMAD family member 9 [Source:HGNC Symbol;Acc:6774]	ENSG00000120693	ENSP00000369154
SMAD3	SMAD family member 3 [Source:HGNC Symbol;Acc:6769]	ENSG00000166949	ENSP00000332973
SMAD4	SMAD family member 4 [Source:HGNC Symbol;Acc:6770]	ENSG00000141646	ENSP00000341551
SMAD7	MAD family member 7 [Source:HGNC Symbol;Acc:6773]	ENSG00000101665	ENSP00000262158
SMAD6	SMAD family member 6 [Source:HGNC Symbol;Acc:6772]	ENSG00000137834	ENSP00000288840
PRPF39	PRP39 pre-mRNA processing factor 39 homolog (S. cerevisiae) [Source:HGNC Symbol;Acc:20314]	ENSG00000185246	ENSP00000348010
SRP68	signal recognition particle 68kDa [Source:HGNC Symbol;Acc:11302]	ENSG00000167881	ENSP00000312066
ADARB2	adenosine deaminase, RNA-specific, B2 [Source:HGNC Symbol;Acc:227]	ENSG00000185736	ENSP00000370713
ADAD1	adenosine deaminase domain containing 1 (testis-specific) [Source:HGNC Symbol;Acc:30713]	ENSG00000164113	ENSP00000373376
ADAD2	adenosine deaminase domain containing 2 [Source:HGNC Symbol;Acc:30714]	ENSG00000140955	ENSP00000268624
ADAT1	adenosine deaminase, tRNA-specific 1 [Source:HGNC Symbol;Acc:228]	ENSG00000065457	ENSP00000457501
ADARB1	adenosine deaminase, RNA-specific, B1 [Source:HGNC Symbol;Acc:226]	ENSG00000197381	ENSP00000441897
ADAR	adenosine deaminase, RNA-specific [Source:HGNC Symbol;Acc:225]	ENSG00000160710	ENSP00000357459
CLK3	CDC-like kinase 3 [Source:HGNC Symbol;Acc:2071]	ENSG00000179335	ENSP00000344112
CLK4	CDC-like kinase 4 [Source:HGNC Symbol;Acc:13659]	ENSG00000113240	ENSP00000316948
PRPF4B	PRP4 pre-mRNA processing factor 4 homolog B (yeast) [Source:HGNC Symbol;Acc:17346]	ENSG00000112739	ENSP00000337194
CLK1	CDC-like kinase 1 [Source:HGNC Symbol;Acc:2068]	ENSG00000013441	ENSP00000326830
CLK2	CDC-like kinase 2 [Source:HGNC Symbol;Acc:2069]	ENSG00000176444	ENSP00000354856
LSM3	LSM3 homolog, U6 small nuclear RNA associated (S. cerevisiae) [Source:HGNC Symbol;Acc:17874]	ENSG00000170860	ENSP00000302160
FAM46A	family with sequence similarity 46, member A [Source:HGNC Symbol;Acc:18345]	ENSG00000112773	ENSP00000358769
CRYZ	crystallin, zeta (quinone reductase) [Source:HGNC Symbol;Acc:2419]	ENSG00000116791	ENSP00000399805
KIN	KIN, antigenic determinant of recA protein homolog (mouse) [Source:HGNC Symbol;Acc:6327]	ENSG00000151657	ENSP00000368881
RPS2	ribosomal protein S2 [Source:HGNC Symbol;Acc:10404]	ENSG00000140988	ENSP00000433034
DUS4L	dihydrouridine synthase 4-like (S. cerevisiae) [Source:HGNC Symbol;Acc:21517]	ENSG00000105865	ENSP00000265720
EIF4A1	eukaryotic translation initiation factor 4A1 [Source:HGNC Symbol;Acc:3282]	ENSG00000161960	ENSP00000463486
EIF4A2	eukaryotic translation initiation factor 4A2 [Source:HGNC Symbol;Acc:3284]	ENSG00000156976	ENSP00000398370
EIF4A3	eukaryotic translation initiation factor 4A3 [Source:HGNC Symbol;Acc:18683]	ENSG00000141543	ENSP00000269349
IGF2BP1	insulin-like growth factor 2 mRNA binding protein 1 [Source:HGNC Symbol;Acc:28866]	ENSG00000159217	ENSP00000290341
IGF2BP2	insulin-like growth factor 2 mRNA binding protein 2 [Source:HGNC Symbol;Acc:28867]	ENSG00000073792	ENSP00000320204
IGF2BP3	insulin-like growth factor 2 mRNA binding protein 3 [Source:HGNC Symbol;Acc:28868]	ENSG00000136231	ENSP00000258729
UBAP2	ubiquitin associated protein 2 [Source:HGNC Symbol;Acc:14185]	ENSG00000137073	ENSP00000368540
UBAP2L	ubiquitin associated protein 2-like [Source:HGNC Symbol;Acc:29877]	ENSG00000143569	ENSP00000345308
SNRPE	small nuclear ribonucleoprotein polypeptide E [Source:HGNC Symbol;Acc:11161]	ENSG00000182004	ENSP00000400591
EIF2B5	eukaryotic translation initiation factor 2B, subunit 5 epsilon, 82kDa [Source:HGNC Symbol;Acc:3261]	ENSG00000145191	ENSP00000409142
CRNKL1	crooked neck pre-mRNA splicing factor-like 1 (Drosophila) [Source:HGNC Symbol;Acc:15762]	ENSG00000101343	ENSP00000440733
POLRMT	polymerase (RNA) mitochondrial (DNA directed) [Source:HGNC Symbol;Acc:9200]	ENSG00000099821	ENSP00000465759
METTL10	methyltransferase like 10 [Source:HGNC Symbol;Acc:33787]	ENSG00000203791	ENSP00000357829
MRPL41	mitochondrial ribosomal protein L41 [Source:HGNC Symbol;Acc:14492]	ENSG00000182154	ENSP00000360498
MRPS7	mitochondrial ribosomal protein S7 [Source:HGNC Symbol;Acc:14499]	ENSG00000125445	ENSP00000463263
NSUN5	NOP2/Sun domain family, member 5 [Source:HGNC Symbol;Acc:16385]	ENSG00000130305	ENSP00000393081
NSUN7	NOP2/Sun domain family, member 7 [Source:HGNC Symbol;Acc:25857]	ENSG00000179299	ENSP00000371201
MTG1	Mitochondrial GTPase 1 [Source:UniProtKB/TrEMBL;Acc:E9PI62]	ENSG00000254536	ENSP00000436767
MRPS28	mitochondrial ribosomal protein S28 [Source:HGNC Symbol;Acc:14513]	ENSG00000147586	ENSP00000430401
TDRD10	tudor domain containing 10 [Source:HGNC Symbol;Acc:25316]	ENSG00000163239	ENSP00000357467
RPUSD1	RNA pseudouridylate synthase domain containing 1 [Source:HGNC Symbol;Acc:14173]	ENSG00000007376	ENSP00000456692
NHP2	NHP2 ribonucleoprotein [Source:HGNC Symbol;Acc:14377]	ENSG00000145912	ENSP00000423803
XAB2	XPA binding protein 2 [Source:HGNC Symbol;Acc:14089]	ENSG00000076924	ENSP00000351137
FAU	Finkel-Biskis-Reilly murine sarcoma virus (FBR-MuSV) ubiquitously expressed [Source:HGNC Symbol;Acc:3597]	ENSG00000149806	ENSP00000435370
RRP36	ribosomal RNA processing 36 homolog (S. cerevisiae) [Source:HGNC Symbol;Acc:21374]	ENSG00000124541	ENSP00000244496
GRWD1	glutamate-rich WD repeat containing 1 [Source:HGNC Symbol;Acc:21270]	ENSG00000105447	ENSP00000253237
ENDOV	endonuclease V [Source:HGNC Symbol;Acc:26640]	ENSG00000173818	ENSP00000429190
VARSL	Valine--tRNA ligase, mitochondrial; Valyl-tRNA synthetase like [Source:UniProtKB/TrEMBL;Acc:A2ABL6]	ENSG00000206476	ENSP00000446608
MRRF	mitochondrial ribosome recycling factor [Source:HGNC Symbol;Acc:7234]	ENSG00000148187	ENSP00000395072
MTFMT	mitochondrial methionyl-tRNA formyltransferase [Source:HGNC Symbol;Acc:29666]	ENSG00000103707	ENSP00000220058
C12orf65	chromosome 12 open reading frame 65 [Source:HGNC Symbol;Acc:26784]	ENSG00000130921	ENSP00000390647
MRTO4	mRNA turnover 4 homolog (S. cerevisiae) [Source:HGNC Symbol;Acc:18477]	ENSG00000053372	ENSP00000364320
RBM26	RNA binding motif protein 26 [Source:HGNC Symbol;Acc:20327]	ENSG00000139746	ENSP00000267229
RBM27	RNA binding motif protein 27 [Source:HGNC Symbol;Acc:29243]	ENSG00000091009	ENSP00000265271
DIS3	DIS3 mitotic control homolog (S. cerevisiae) [Source:HGNC Symbol;Acc:20604]	ENSG00000083520	ENSP00000367011
DIS3L	DIS3 mitotic control homolog (S. cerevisiae)-like [Source:HGNC Symbol;Acc:28698]	ENSG00000166938	ENSP00000321711
DIS3L2	DIS3 mitotic control homolog (S. cerevisiae)-like 2 [Source:HGNC Symbol;Acc:28648]	ENSG00000144535	ENSP00000390467
C1QBP	complement component 1, q subcomponent binding protein [Source:HGNC Symbol;Acc:1243]	ENSG00000108561	ENSP00000225698
SUB1	SUB1 homolog (S. cerevisiae) [Source:HGNC Symbol;Acc:19985]	ENSG00000113387	ENSP00000426850
MRPS33	mitochondrial ribosomal protein S33 [Source:HGNC Symbol;Acc:16634]	ENSG00000090263	ENSP00000376732
PRPF6	PRP6 pre-mRNA processing factor 6 homolog (S. cerevisiae) [Source:HGNC Symbol;Acc:15860]	ENSG00000101161	ENSP00000266079
SMG8	smg-8 homolog, nonsense mediated mRNA decay factor (C. elegans) [Source:HGNC Symbol;Acc:25551]	ENSG00000167447	ENSP00000438748
PSTK	phosphoseryl-tRNA kinase [Source:HGNC Symbol;Acc:28578]	ENSG00000179988	ENSP00000357882
GAPDH	glyceraldehyde-3-phosphate dehydrogenase [Source:HGNC Symbol;Acc:4141]	ENSG00000111640	ENSP00000229239
TNPO3	transportin 3 [Source:HGNC Symbol;Acc:17103]	ENSG00000064419	ENSP00000418267
IPO13	importin 13 [Source:HGNC Symbol;Acc:16853]	ENSG00000117408	ENSP00000361418
MOV10	Mov10, Moloney leukemia virus 10, homolog (mouse) [Source:HGNC Symbol;Acc:7200]	ENSG00000155363	ENSP00000399797
MOV10L1	Mov10l1, Moloney leukemia virus 10-like 1, homolog (mouse) [Source:HGNC Symbol;Acc:7201]	ENSG00000073146	ENSP00000438978
PARP1	poly (ADP-ribose) polymerase 1 [Source:HGNC Symbol;Acc:270]	ENSG00000143799	ENSP00000355759
MRPS35	mitochondrial ribosomal protein S35 [Source:HGNC Symbol;Acc:16635]	ENSG00000061794	ENSP00000081029
GPKOW	G patch domain and KOW motifs [Source:HGNC Symbol;Acc:30677]	ENSG00000268675	ENSP00000471681
SETD1A	SET domain containing 1A [Source:HGNC Symbol;Acc:29010]	ENSG00000099381	ENSP00000262519
SETD1B	SET domain containing 1B [Source:HGNC Symbol;Acc:29187]	ENSG00000139718	ENSP00000442924
SF3A2	splicing factor 3a, subunit 2, 66kDa [Source:HGNC Symbol;Acc:10766]	ENSG00000104897	ENSP00000221494
AFF1	AF4/FMR2 family, member 1 [Source:HGNC Symbol;Acc:7135]	ENSG00000172493	ENSP00000378578
AFF3	AF4/FMR2 family, member 3 [Source:HGNC Symbol;Acc:6473]	ENSG00000144218	ENSP00000411383
AFF4	AF4/FMR2 family, member 4 [Source:HGNC Symbol;Acc:17869]	ENSG00000072364	ENSP00000395268
AFF2	AF4/FMR2 family, member 2 [Source:HGNC Symbol;Acc:3776]	ENSG00000269754	ENSP00000472279
PARK7	parkinson protein 7 [Source:HGNC Symbol;Acc:16369]	ENSG00000116288	ENSP00000418770
TRNAU1AP	tRNA selenocysteine 1 associated protein 1 [Source:HGNC Symbol;Acc:30813]	ENSG00000180098	ENSP00000362936
SRBD1	S1 RNA binding domain 1 [Source:HGNC Symbol;Acc:25521]	ENSG00000068784	ENSP00000263736
EIF3D	eukaryotic translation initiation factor 3, subunit D [Source:HGNC Symbol;Acc:3278]	ENSG00000100353	ENSP00000216190
NOP10	NOP10 ribonucleoprotein [Source:HGNC Symbol;Acc:14378]	ENSG00000182117	ENSP00000453475
WARS	tryptophanyl-tRNA synthetase [Source:HGNC Symbol;Acc:12729]	ENSG00000140105	ENSP00000452519
MATR3	matrin 3 [Source:HGNC Symbol;Acc:6912]	ENSG00000015479	ENSP00000378279
SNRPD1	small nuclear ribonucleoprotein D1 polypeptide 16kDa [Source:HGNC Symbol;Acc:11158]	ENSG00000167088	ENSP00000300413
SNRPC	small nuclear ribonucleoprotein polypeptide C [Source:HGNC Symbol;Acc:11157]	ENSG00000124562	ENSP00000244520
FXR1	fragile X mental retardation, autosomal homolog 1 [Source:HGNC Symbol;Acc:4023]	ENSG00000114416	ENSP00000420643
FXR2	fragile X mental retardation, autosomal homolog 2 [Source:HGNC Symbol;Acc:4024]	ENSG00000129245	ENSP00000250113
FMR1	fragile X mental retardation 1 [Source:HGNC Symbol;Acc:3775]	ENSG00000102081	ENSP00000359506
MEPCE	methylphosphate capping enzyme [Source:HGNC Symbol;Acc:20247]	ENSG00000146834	ENSP00000308546
KAT8	K(lysine) acetyltransferase 8 [Source:HGNC Symbol;Acc:17933]	ENSG00000103510	ENSP00000406037
CIRBP	cold inducible RNA binding protein [Source:HGNC Symbol;Acc:1982]	ENSG00000099622	ENSP00000465558
RBM3	RNA binding motif (RNP1, RRM) protein 3 [Source:HGNC Symbol;Acc:9900]	ENSG00000102317	ENSP00000365950
CNOT7	CCR4-NOT transcription complex, subunit 7 [Source:HGNC Symbol;Acc:14101]	ENSG00000198791	ENSP00000430160
CNOT8	CCR4-NOT transcription complex, subunit 8 [Source:HGNC Symbol;Acc:9207]	ENSG00000155508	ENSP00000430493
A1CF	APOBEC1 complementation factor [Source:HGNC Symbol;Acc:24086]	ENSG00000148584	ENSP00000282641
RBM46	RNA binding motif protein 46 [Source:HGNC Symbol;Acc:28401]	ENSG00000151962	ENSP00000424500
RBM47	RNA binding motif protein 47 [Source:HGNC Symbol;Acc:30358]	ENSG00000163694	ENSP00000423243
DND1	dead end homolog 1 (zebrafish) [Source:HGNC Symbol;Acc:23799]	ENSG00000256453	ENSP00000445366
HNRNPR	heterogeneous nuclear ribonucleoprotein R [Source:HGNC Symbol;Acc:5047]	ENSG00000125944	ENSP00000363741
SYNCRIP	synaptotagmin binding, cytoplasmic RNA interacting protein [Source:HGNC Symbol;Acc:16918]	ENSG00000135316	ENSP00000358635
ABCE1	ATP-binding cassette, sub-family E (OABP), member 1 [Source:HGNC Symbol;Acc:69]	ENSG00000164163	ENSP00000296577
GPATCH4	G patch domain containing 4 [Source:HGNC Symbol;Acc:25982]	ENSG00000160818	ENSP00000412620
PAIP1	poly(A) binding protein interacting protein 1 [Source:HGNC Symbol;Acc:16945]	ENSG00000172239	ENSP00000425675
RBM20	RNA binding motif protein 20 [Source:HGNC Symbol;Acc:27424]	ENSG00000203867	ENSP00000358532
GNL3	guanine nucleotide binding protein-like 3 (nucleolar) [Source:HGNC Symbol;Acc:29931]	ENSG00000163938	ENSP00000378278
GNL3L	guanine nucleotide binding protein-like 3 (nucleolar)-like [Source:HGNC Symbol;Acc:25553]	ENSG00000130119	ENSP00000338573
FAM120A	family with sequence similarity 120A [Source:HGNC Symbol;Acc:13247]	ENSG00000048828	ENSP00000277165
FAM120B	family with sequence similarity 120B [Source:HGNC Symbol;Acc:21109]	ENSG00000112584	ENSP00000417970
FAM120C	family with sequence similarity 120C [Source:HGNC Symbol;Acc:16949]	ENSG00000184083	ENSP00000364324
KHDC1	KH homology domain containing 1 [Source:HGNC Symbol;Acc:21366] [Type: protein coding Ensembl/Havana merge]	ENSG00000135314	ENSP00000359411
KHDC1L	Putative KHDC1-like protein [Source:UniProtKB/TrEMBL;Acc:F5H697] [Type: protein coding Havana]	ENSG00000243501	ENSP00000359415
RPL10L	ribosomal protein L10-like [Source:HGNC Symbol;Acc:17976]	ENSG00000165496	ENSP00000298283
RPL10	ribosomal protein L10 [Source:HGNC Symbol;Acc:10298]	ENSG00000147403	ENSP00000341730
EIF2S1	eukaryotic translation initiation factor 2, subunit 1 alpha, 35kDa [Source:HGNC Symbol;Acc:3265]	ENSG00000134001	ENSP00000256383
MRPL20	mitochondrial ribosomal protein L20 [Source:HGNC Symbol;Acc:14478]	ENSG00000242485	ENSP00000341082
EPRS	glutamyl-prolyl-tRNA synthetase [Source:HGNC Symbol;Acc:3418]	ENSG00000136628	ENSP00000355890
DHX58	DEXH (Asp-Glu-X-His) box polypeptide 58 [Source:HGNC Symbol;Acc:29517]	ENSG00000260178	ENSP00000455290
DDX58	DEAD (Asp-Glu-Ala-Asp) box polypeptide 58 [Source:HGNC Symbol;Acc:19102]	ENSG00000107201	ENSP00000369213
IFIH1	interferon induced with helicase C domain 1 [Source:HGNC Symbol;Acc:18873]	ENSG00000115267	ENSP00000263642
CDK5RAP1	CDK5 regulatory subunit associated protein 1 [Source:HGNC Symbol;Acc:15880]	ENSG00000101391	ENSP00000217372
HABP4	hyaluronan binding protein 4 [Source:HGNC Symbol;Acc:17062]	ENSG00000130956	ENSP00000364398
SERBP1	SERPINE1 mRNA binding protein 1 [Source:HGNC Symbol;Acc:17860]	ENSG00000142864	ENSP00000360029
METTL5	methyltransferase like 5 [Source:HGNC Symbol;Acc:25006] [Type: protein coding Ensembl/Havana merge]	ENSG00000138382	ENSP00000260953
ZCCHC7	zinc finger, CCHC domain containing 7 [Source:HGNC Symbol;Acc:26209]	ENSG00000147905	ENSP00000337839
WDR36	WD repeat domain 36 [Source:HGNC Symbol;Acc:30696]	ENSG00000134987	ENSP00000424628
CCDC86	coiled-coil domain containing 86 [Source:HGNC Symbol;Acc:28359]	ENSG00000110104	ENSP00000227520
C2orf15	chromosome 2 open reading frame 15 [Source:HGNC Symbol;Acc:28436]	ENSG00000241962	ENSP00000420959
MRPL30	mitochondrial ribosomal protein L30 [Source:HGNC Symbol;Acc:14036]	ENSG00000185414	ENSP00000386970
RPS26	ribosomal protein S26 [Source:HGNC Symbol;Acc:10414]	ENSG00000197728	ENSP00000348849
TEX13A	testis expressed 13A [Source:HGNC Symbol;Acc:11735]	ENSG00000133149	ENSP00000399753
BARD1	BRCA1 associated RING domain 1 [Source:HGNC Symbol;Acc:952]	ENSG00000138376	ENSP00000260947
XPO4	exportin 4 [Source:HGNC Symbol;Acc:17796]	ENSG00000132953	ENSP00000383444
RUVBL1	RuvB-like 1 (E. coli) [Source:HGNC Symbol;Acc:10474] [Type: protein coding Ensembl/Havana merge]	ENSG00000175792	ENSP00000318297
IMP4	IMP4, U3 small nucleolar ribonucleoprotein, homolog (yeast) [Source:HGNC Symbol;Acc:30856]	ENSG00000136718	ENSP00000389701
DDX52	DEAD (Asp-Glu-Ala-Asp) box polypeptide 52 [Source:HGNC Symbol;Acc:20038]	ENSG00000141141	ENSP00000377893
THOC1	THO complex 1 [Source:HGNC Symbol;Acc:19070]	ENSG00000079134	ENSP00000261600
TRPT1	tRNA phosphotransferase 1 [Source:HGNC Symbol;Acc:20316]	ENSG00000149743	ENSP00000439586
NHP2L1	NHP2 non-histone chromosome protein 2-like 1 (S. cerevisiae) [Source:HGNC Symbol;Acc:7819]	ENSG00000100138	ENSP00000383989
EIF2B2	eukaryotic translation initiation factor 2B, subunit 2 beta, 39kDa [Source:HGNC Symbol;Acc:3258]	ENSG00000119718	ENSP00000266126
RNF113B	ring finger protein 113B [Source:HGNC Symbol;Acc:17267]	ENSG00000139797	ENSP00000267291
RNF113A	ring finger protein 113A [Source:HGNC Symbol;Acc:12974]	ENSG00000125352	ENSP00000360497
INTS10	integrator complex subunit 10 [Source:HGNC Symbol;Acc:25548] [Type: protein coding Ensembl/Havana merge]	ENSG00000104613	ENSP00000381064
LENG9	Leukocyte receptor cluster (LRC) member 9 [Source:UniProtKB/TrEMBL;Acc:B0VJZ1]	ENSG00000262887	ENSP00000458921
RPS29	ribosomal protein S29 [Source:HGNC Symbol;Acc:10419]	ENSG00000213741	ENSP00000245458
NOP16	NOP16 nucleolar protein [Source:HGNC Symbol;Acc:26934]	ENSG00000048162	ENSP00000427489
U2AF1	U2 small nuclear RNA auxiliary factor 1 [Source:HGNC Symbol;Acc:12453]	ENSG00000160201	ENSP00000369629
U2AF1L4	U2 small nuclear RNA auxiliary factor 1-like 4 [Source:HGNC Symbol;Acc:23020]	ENSG00000161265	ENSP00000368258
RANBP6	RAN binding protein 6 [Source:HGNC Symbol;Acc:9851]	ENSG00000137040	ENSP00000259569
IPO5	importin 5 [Source:HGNC Symbol;Acc:6402]	ENSG00000065150	ENSP00000350219
THOC7	THO complex 7 homolog (Drosophila) [Source:HGNC Symbol;Acc:29874]	ENSG00000163634	ENSP00000295899
DNMT3B	DNA (cytosine-5-)-methyltransferase 3 beta [Source:HGNC Symbol;Acc:2979]	ENSG00000088305	ENSP00000328547
GFM1	G elongation factor, mitochondrial 1 [Source:HGNC Symbol;Acc:13780]	ENSG00000168827	ENSP00000264263
RNASE9	ribonuclease, RNase A family, 9 (non-active) [Source:HGNC Symbol;Acc:20673]	ENSG00000188655	ENSP00000451565
PLRG1	pleiotropic regulator 1 [Source:HGNC Symbol;Acc:9089]	ENSG00000171566	ENSP00000424417
REXO1	REX1, RNA exonuclease 1 homolog (S. cerevisiae) [Source:HGNC Symbol;Acc:24616]	ENSG00000079313	ENSP00000170168
ZC3HAV1L	zinc finger CCCH-type, antiviral 1-like [Source:HGNC Symbol;Acc:22423] [Type: protein coding Ensembl/Havana merge]	ENSG00000146858	ENSP00000275766
LSM14A	LSM14A, SCD6 homolog A (S. cerevisiae) [Source:HGNC Symbol;Acc:24489]	ENSG00000262860	ENSP00000460896
LSM14B	LSM14B, SCD6 homolog B (S. cerevisiae) [Source:HGNC Symbol;Acc:15887]	ENSG00000149657	ENSP00000383172
LUZP4	leucine zipper protein 4 [Source:HGNC Symbol;Acc:24971]	ENSG00000267900	ENSP00000472441
TDRD6	tudor domain containing 6 [Source:HGNC Symbol;Acc:21339]	ENSG00000180113	ENSP00000443299
TDRD15	tudor domain containing 15 [Source:HGNC Symbol;Acc:45037]	ENSG00000218819	ENSP00000384376
MRPS22	mitochondrial ribosomal protein S22 [Source:HGNC Symbol;Acc:14508]	ENSG00000175110	ENSP00000420229
EEF1B2	eukaryotic translation elongation factor 1 beta 2 [Source:HGNC Symbol;Acc:3208]	ENSG00000114942	ENSP00000376056
EEF1D	eukaryotic translation elongation factor 1 delta (guanine nucleotide exchange protein) [Source:HGNC Symbol;Acc:3211]	ENSG00000104529	ENSP00000433611
SIDT1	SID1 transmembrane family, member 1 [Source:HGNC Symbol;Acc:25967]	ENSG00000072858	ENSP00000264852
SIDT2	SID1 transmembrane family, member 2 [Source:HGNC Symbol;Acc:24272]	ENSG00000149577	ENSP00000314023
TRMT44	tRNA methyltransferase 44 homolog (S. cerevisiae) [Source:HGNC Symbol;Acc:26653]	ENSG00000155275	ENSP00000374387
GPATCH8	G patch domain containing 8 [Source:HGNC Symbol;Acc:29066]	ENSG00000186566	ENSP00000467556
WDR4	WD repeat domain 4 [Source:HGNC Symbol;Acc:12756]	ENSG00000160193	ENSP00000381266
SLIRP	SRA stem-loop interacting RNA binding protein [Source:HGNC Symbol;Acc:20495]	ENSG00000119705	ENSP00000450909
ATXN1	ataxin 1 [Source:HGNC Symbol;Acc:10548]	ENSG00000124788	ENSP00000416360
ATXN1L	ataxin 1-like [Source:HGNC Symbol;Acc:33279]	ENSG00000224470	ENSP00000415822
YTHDF1	YTH domain family, member 1 [Source:HGNC Symbol;Acc:15867]	ENSG00000149658	ENSP00000359358
YTHDF2	YTH domain family, member 2 [Source:HGNC Symbol;Acc:31675]	ENSG00000198492	ENSP00000444660
YTHDF3	YTH domain family, member 3 [Source:HGNC Symbol;Acc:26465]	ENSG00000185728	ENSP00000473387
LRPPRC	leucine-rich pentatricopeptide repeat containing [Source:HGNC Symbol;Acc:15714]	ENSG00000138095	ENSP00000260665
TFIP11	tuftelin interacting protein 11 [Source:HGNC Symbol;Acc:17165]	ENSG00000100109	ENSP00000384297
ILF2	interleukin enhancer binding factor 2 [Source:HGNC Symbol;Acc:6037]	ENSG00000143621	ENSP00000355011
STRBP	spermatid perinuclear RNA binding protein [Source:HGNC Symbol;Acc:16462]	ENSG00000165209	ENSP00000321347
ILF3	interleukin enhancer binding factor 3, 90kDa [Source:HGNC Symbol;Acc:6038]	ENSG00000129351	ENSP00000384660
TCERG1	transcription elongation regulator 1 [Source:HGNC Symbol;Acc:15630]	ENSG00000113649	ENSP00000296702
NXF5	nuclear RNA export factor 5 [Source:HGNC Symbol;Acc:8075]	ENSG00000126952	ENSP00000442401
NXF2B	nuclear RNA export factor 2B [Source:HGNC Symbol;Acc:23984]	ENSG00000185945	ENSP00000361836
NXF2	HCG2045905, isoform CRA_a [Source:UniProtKB/TrEMBL;Acc:D3DX98]	ENSG00000269437	ENSP00000472530
NXF1	nuclear RNA export factor 1 [Source:HGNC Symbol;Acc:8071]	ENSG00000162231	ENSP00000294172
NXF3	nuclear RNA export factor 3 [Source:HGNC Symbol;Acc:8073]	ENSG00000147206	ENSP00000404017
ZRSR1	zinc finger (CCCH type), RNA-binding motif and serine/arginine rich 1 [Source:HGNC Symbol;Acc:12456]	ENSG00000212643	ENSP00000375133
ZRSR2	zinc finger (CCCH type), RNA-binding motif and serine/arginine rich 2 [Source:HGNC Symbol;Acc:23019]	ENSG00000169249	ENSP00000303015
MRPL35	mitochondrial ribosomal protein L35 [Source:HGNC Symbol;Acc:14489]	ENSG00000132313	ENSP00000338389
RRS1	RRS1 ribosome biogenesis regulator homolog (S. cerevisiae) [Source:HGNC Symbol;Acc:17083]	ENSG00000179041	ENSP00000322396
PRKDC	protein kinase, DNA-activated, catalytic polypeptide [Source:HGNC Symbol;Acc:9413]	ENSG00000253729	ENSP00000442177
NOC2L	nucleolar complex associated 2 homolog (S. cerevisiae) [Source:HGNC Symbol;Acc:24517]	ENSG00000188976	ENSP00000317992
MTIF3	mitochondrial translational initiation factor 3 [Source:HGNC Symbol;Acc:29788]	ENSG00000122033	ENSP00000370508
NOL11	nucleolar protein 11 [Source:HGNC Symbol;Acc:24557]	ENSG00000130935	ENSP00000464015
EXOSC3	exosome component 3 [Source:HGNC Symbol;Acc:17944]	ENSG00000107371	ENSP00000323046
PNPT1	polyribonucleotide nucleotidyltransferase 1 [Source:HGNC Symbol;Acc:23166]	ENSG00000138035	ENSP00000400646
TSNAX	translin-associated factor X [Source:HGNC Symbol;Acc:12380]	ENSG00000116918	ENSP00000397537
RIOK1	RIO kinase 1 [Source:HGNC Symbol;Acc:18656]	ENSG00000124784	ENSP00000369162
RIOK3	RIO kinase 3 [Source:HGNC Symbol;Acc:11451]	ENSG00000101782	ENSP00000462548
PIWIL1	piwi-like 1 (Drosophila) [Source:HGNC Symbol;Acc:9007]	ENSG00000125207	ENSP00000245255
PIWIL2	piwi-like 2 (Drosophila) [Source:HGNC Symbol;Acc:17644]	ENSG00000197181	ENSP00000428267
PIWIL3	piwi-like 3 (Drosophila) [Source:HGNC Symbol;Acc:18443]	ENSG00000184571	ENSP00000431843
PIWIL4	piwi-like 4 (Drosophila) [Source:HGNC Symbol;Acc:18444]	ENSG00000134627	ENSP00000299001
PEG10	paternally expressed 10 [Source:HGNC Symbol;Acc:14005]	ENSG00000242265	ENSP00000417587
ZCCHC5	zinc finger, CCHC domain containing 5 [Source:HGNC Symbol;Acc:22997]	ENSG00000179300	ENSP00000316794
POP7	processing of precursor 7, ribonuclease P/MRP subunit (S. cerevisiae) [Source:HGNC Symbol;Acc:19949]	ENSG00000172336	ENSP00000304353
FASTKD3	FAST kinase domains 3 [Source:HGNC Symbol;Acc:28758]	ENSG00000124279	ENSP00000264669
TBRG4	transforming growth factor beta regulator 4 [Source:HGNC Symbol;Acc:17443]	ENSG00000136270	ENSP00000420597
FASTK	Fas-activated serine/threonine kinase [Source:HGNC Symbol;Acc:24676]	ENSG00000164896	ENSP00000297532
TRMT13	tRNA methyltransferase 13 homolog (S. cerevisiae) [Source:HGNC Symbol;Acc:25502]	ENSG00000122435	ENSP00000359160
IREB2	iron-responsive element binding protein 2 [Source:HGNC Symbol;Acc:6115]	ENSG00000136381	ENSP00000258886
ACO1	aconitase 1, soluble [Source:HGNC Symbol;Acc:117]	ENSG00000122729	ENSP00000438733
ZCCHC3	zinc finger, CCHC domain containing 3 [Source:HGNC Symbol;Acc:16230]	ENSG00000177764	ENSP00000371789
SNUPN	snurportin 1 [Source:HGNC Symbol;Acc:14245]	ENSG00000169371	ENSP00000309831
PTRHD1	peptidyl-tRNA hydrolase domain containing 1 [Source:HGNC Symbol;Acc:33782]	ENSG00000184924	ENSP00000330389
HARS	histidyl-tRNA synthetase [Source:HGNC Symbol;Acc:4816]	ENSG00000170445	ENSP00000411085
HARS2	histidyl-tRNA synthetase 2, mitochondrial [Source:HGNC Symbol;Acc:4817]	ENSG00000112855	ENSP00000230771
HNRNPK	heterogeneous nuclear ribonucleoprotein K [Source:HGNC Symbol;Acc:5044]	ENSG00000165119	ENSP00000365458
PCBP1	poly(rC) binding protein 1 [Source:HGNC Symbol;Acc:8647]	ENSG00000169564	ENSP00000305556
PCBP2	poly(rC) binding protein 2 [Source:HGNC Symbol;Acc:8648]	ENSG00000197111	ENSP00000394116
PCBP3	poly(rC) binding protein 3 [Source:HGNC Symbol;Acc:8651]	ENSG00000183570	ENSP00000383165
PCBP4	poly(rC) binding protein 4 [Source:HGNC Symbol;Acc:8652]	ENSG00000090097	ENSP00000395030
AQR	aquarius homolog (mouse) [Source:HGNC Symbol;Acc:29513]	ENSG00000021776	ENSP00000156471
ICT1	immature colon carcinoma transcript 1 [Source:HGNC Symbol;Acc:5359]	ENSG00000167862	ENSP00000301585
UNK	unkempt homolog (Drosophila) [Source:HGNC Symbol;Acc:29369]	ENSG00000132478	ENSP00000293218
UNKL	unkempt homolog (Drosophila)-like [Source:HGNC Symbol;Acc:14184]	ENSG00000059145	ENSP00000373873
CEBPZ	CCAAT/enhancer binding protein (C/EBP), zeta [Source:HGNC Symbol;Acc:24218]	ENSG00000115816	ENSP00000234170
MRPS9	mitochondrial ribosomal protein S9 [Source:HGNC Symbol;Acc:14501]	ENSG00000135972	ENSP00000258455
THG1L	tRNA-histidine guanylyltransferase 1-like (S. cerevisiae) [Source:HGNC Symbol;Acc:26053]	ENSG00000113272	ENSP00000231198
ZCCHC13	zinc finger, CCHC domain containing 13 [Source:HGNC Symbol;Acc:31749]	ENSG00000187969	ENSP00000345633
CNBP	CCHC-type zinc finger, nucleic acid binding protein [Source:HGNC Symbol;Acc:13164]	ENSG00000169714	ENSP00000410769
SRRT	serrate RNA effector molecule homolog (Arabidopsis) [Source:HGNC Symbol;Acc:24101]	ENSG00000087087	ENSP00000391852
CD2BP2	CD2 (cytoplasmic tail) binding protein 2 [Source:HGNC Symbol;Acc:1656]	ENSG00000169217	ENSP00000304903
SNRPG	small nuclear ribonucleoprotein polypeptide G [Source:HGNC Symbol;Acc:11163]	ENSG00000143977	ENSP00000272348
APTX	aprataxin [Source:HGNC Symbol;Acc:15984]	ENSG00000137074	ENSP00000369141
RPL17	ribosomal protein L17 [Source:HGNC Symbol;Acc:10307]	ENSG00000265681	ENSP00000463885
BMS1	BMS1 homolog, ribosome assembly protein (yeast) [Source:HGNC Symbol;Acc:23505]	ENSG00000165733	ENSP00000363642
SARS	seryl-tRNA synthetase [Source:HGNC Symbol;Acc:10537]	ENSG00000031698	ENSP00000358939
SARS2	Serine--tRNA ligase, mitochondrial [Source:UniProtKB/TrEMBL;Acc:E7EX87]	ENSG00000269547	ENSP00000472465
PAIP2	poly(A) binding protein interacting protein 2 [Source:HGNC Symbol;Acc:17970]	ENSG00000120727	ENSP00000378275
PAIP2B	poly(A) binding protein interacting protein 2B [Source:HGNC Symbol;Acc:29200]	ENSG00000124374	ENSP00000244221
GEMIN4	gem (nuclear organelle) associated protein 4 [Source:HGNC Symbol;Acc:15717] [Type: protein coding Ensembl/Havana merge]	ENSG00000179409	ENSP00000321706
PNRC2	proline-rich nuclear receptor coactivator 2 [Source:HGNC Symbol;Acc:23158]	ENSG00000189266	ENSP00000334840
FASTKD2	FAST kinase domains 2 [Source:HGNC Symbol;Acc:29160]	ENSG00000118246	ENSP00000236980
GEMIN6	gem (nuclear organelle) associated protein 6 [Source:HGNC Symbol;Acc:20044]	ENSG00000152147	ENSP00000387191
DDX20	DEAD (Asp-Glu-Ala-Asp) box polypeptide 20 [Source:HGNC Symbol;Acc:2743]	ENSG00000064703	ENSP00000358716
DDX39A	DEAD (Asp-Glu-Ala-Asp) box polypeptide 39A [Source:HGNC Symbol;Acc:17821]	ENSG00000123136	ENSP00000242776
DDX39B	DEAD (Asp-Glu-Ala-Asp) box polypeptide 39B [Source:HGNC Symbol;Acc:13917]	ENSG00000237889	ENSP00000406348
DHX37	DEAH (Asp-Glu-Ala-His) box polypeptide 37 [Source:HGNC Symbol;Acc:17210]	ENSG00000150990	ENSP00000311135
ZNF346	zinc finger protein 346 [Source:HGNC Symbol;Acc:16403]	ENSG00000113761	ENSP00000350869
MRPL50	mitochondrial ribosomal protein L50 [Source:HGNC Symbol;Acc:16654]	ENSG00000136897	ENSP00000443844
RNASE1	ribonuclease, RNase A family, 1 (pancreatic) [Source:HGNC Symbol;Acc:10044]	ENSG00000129538	ENSP00000344193
RNASE2	ribonuclease, RNase A family, 2 (liver, eosinophil-derived neurotoxin) [Source:HGNC Symbol;Acc:10045]	ENSG00000169385	ENSP00000303276
RNASE3	ribonuclease, RNase A family, 3 [Source:HGNC Symbol;Acc:10046]	ENSG00000169397	ENSP00000302324
RNASE4	ribonuclease, RNase A family, 4 [Source:HGNC Symbol;Acc:10047]	ENSG00000258818	ENSP00000307096
RNASE6	ribonuclease, RNase A family, k6 [Source:HGNC Symbol;Acc:10048]	ENSG00000169413	ENSP00000302046
RNASE7	ribonuclease, RNase A family, 7 [Source:HGNC Symbol;Acc:19278]	ENSG00000165799	ENSP00000298690
RNASE8	ribonuclease, RNase A family, 8 [Source:HGNC Symbol;Acc:19277]	ENSG00000173431	ENSP00000311398
ANG	angiogenin, ribonuclease, RNase A family, 5 [Source:HGNC Symbol;Acc:483]	ENSG00000214274	ENSP00000336762
DYNC1H1	dynein, cytoplasmic 1, heavy chain 1 [Source:HGNC Symbol;Acc:2961]	ENSG00000197102	ENSP00000348965
FTSJ3	FtsJ homolog 3 (E. coli) [Source:HGNC Symbol;Acc:17136]	ENSG00000108592	ENSP00000396673
SF3B2	splicing factor 3b, subunit 2, 145kDa [Source:HGNC Symbol;Acc:10769]	ENSG00000087365	ENSP00000318861
CTU2	cytosolic thiouridylase subunit 2 homolog (S. pombe) [Source:HGNC Symbol;Acc:28005]	ENSG00000174177	ENSP00000388320
XPOT	exportin, tRNA [Source:HGNC Symbol;Acc:12826]	ENSG00000184575	ENSP00000383722
RBMXL1	RNA binding motif protein, X-linked-like 1 [Source:HGNC Symbol;Acc:25073]	ENSG00000213516	ENSP00000318415
RBMXL2	RNA binding motif protein, X-linked-like 2 [Source:HGNC Symbol;Acc:17886]	ENSG00000170748	ENSP00000304139
RBMXL3	RNA binding motif protein, X-linked-like 3 [Source:HGNC Symbol;Acc:26859]	ENSG00000175718	ENSP00000417451
RBMY1A1	RNA binding motif protein, Y-linked, family 1, member A1 [Source:HGNC Symbol;Acc:9912]	ENSG00000234414	ENSP00000303712
RBMY1B	RNA binding motif protein, Y-linked, family 1, member B [Source:HGNC Symbol;Acc:23914]	ENSG00000242875	ENSP00000372484
RBMY1D	RNA binding motif protein, Y-linked, family 1, member D [Source:HGNC Symbol;Acc:23915]	ENSG00000244395	ENSP00000399181
RBMY1E	RNA binding motif protein, Y-linked, family 1, member E [Source:HGNC Symbol;Acc:23916]	ENSG00000242389	ENSP00000372104
RBMY1F	RNA binding motif protein, Y-linked, family 1, member F [Source:HGNC Symbol;Acc:23974]	ENSG00000169800	ENSP00000406005
RBMY1J	RNA binding motif protein, Y-linked, family 1, member J [Source:HGNC Symbol;Acc:23917]	ENSG00000226941	ENSP00000250831
RBMX	RNA binding motif protein, X-linked [Source:HGNC Symbol;Acc:9910]	ENSG00000147274	ENSP00000405117
PPP1R10	protein phosphatase 1, regulatory subunit 10 [Source:HGNC Symbol;Acc:9284]	ENSG00000235291	ENSP00000389299
PRR3	proline rich 3 [Source:HGNC Symbol;Acc:21149]	ENSG00000206491	ENSP00000404669
DKC1	dyskeratosis congenita 1, dyskerin [Source:HGNC Symbol;Acc:2890]	ENSG00000130826	ENSP00000358563
MRPL17	mitochondrial ribosomal protein L17 [Source:HGNC Symbol;Acc:14053]	ENSG00000158042	ENSP00000288937
TRA2A	transformer 2 alpha homolog (Drosophila) [Source:HGNC Symbol;Acc:16645]	ENSG00000164548	ENSP00000376290
TRA2B	transformer 2 beta homolog (Drosophila) [Source:HGNC Symbol;Acc:10781]	ENSG00000136527	ENSP00000371626
RPL26L1	ribosomal protein L26-like 1 [Source:HGNC Symbol;Acc:17050]	ENSG00000037241	ENSP00000265100
RPL26	ribosomal protein L26 [Source:HGNC Symbol;Acc:10327]	ENSG00000161970	ENSP00000463784
AUH	AU RNA binding protein/enoyl-CoA hydratase [Source:HGNC Symbol;Acc:890] [Type: protein coding Ensembl/Havana merge]	ENSG00000148090	ENSP00000364883
EIF3C	eukaryotic translation initiation factor 3, subunit C [Source:HGNC Symbol;Acc:3279]	ENSG00000184110	ENSP00000378953
EIF3CL	eukaryotic translation initiation factor 3, subunit C-like [Source:HGNC Symbol;Acc:26347]	ENSG00000205609	ENSP00000381916
SCAF8	SR-related CTD-associated factor 8 [Source:HGNC Symbol;Acc:20959]	ENSG00000213079	ENSP00000356154
SCAF4	SR-related CTD-associated factor 4 [Source:HGNC Symbol;Acc:19304]	ENSG00000156304	ENSP00000286835
EEF2K	eukaryotic elongation factor-2 kinase [Source:HGNC Symbol;Acc:24615]	ENSG00000103319	ENSP00000263026
RPL6	ribosomal protein L6 [Source:HGNC Symbol;Acc:10362]	ENSG00000089009	ENSP00000403172
MRPL11	mitochondrial ribosomal protein L11 [Source:HGNC Symbol;Acc:14042]	ENSG00000174547	ENSP00000415356
G3BP1	GTPase activating protein (SH3 domain) binding protein 1 [Source:HGNC Symbol;Acc:30292]	ENSG00000145907	ENSP00000348578
G3BP2	GTPase activating protein (SH3 domain) binding protein 2 [Source:HGNC Symbol;Acc:30291]	ENSG00000138757	ENSP00000352738
MRPS26	mitochondrial ribosomal protein S26 [Source:HGNC Symbol;Acc:14045]	ENSG00000125901	ENSP00000369682
SF3B5	splicing factor 3b, subunit 5, 10kDa [Source:HGNC Symbol;Acc:21083]	ENSG00000169976	ENSP00000356541
DHX34	DEAH (Asp-Glu-Ala-His) box polypeptide 34 [Source:HGNC Symbol;Acc:16719]	ENSG00000134815	ENSP00000331907
UTP23	UTP23, small subunit (SSU) processome component, homolog (yeast) [Source:HGNC Symbol;Acc:28224]	ENSG00000147679	ENSP00000349670
SNRNP48	small nuclear ribonucleoprotein 48kDa (U11/U12) [Source:HGNC Symbol;Acc:21368]	ENSG00000168566	ENSP00000339834
PRPF38B	PRP38 pre-mRNA processing factor 38 (yeast) domain containing B [Source:HGNC Symbol;Acc:25512]	ENSG00000134186	ENSP00000359042
HEXIM1	hexamethylene bis-acetamide inducible 1 [Source:HGNC Symbol;Acc:24953]	ENSG00000186834	ENSP00000328773
HEXIM2	hexamethylene bis-acetamide inducible 2 [Source:HGNC Symbol;Acc:28591]	ENSG00000168517	ENSP00000302276
SRRM2	serine/arginine repetitive matrix 2 [Source:HGNC Symbol;Acc:16639]	ENSG00000167978	ENSP00000458230
SRRM3	serine/arginine repetitive matrix 3 [Source:HGNC Symbol;Acc:26729]	ENSG00000262321	ENSP00000458336
PIH1D3	PIH1 domain containing 3 [Source:HGNC Symbol;Acc:28570]	ENSG00000080572	ENSP00000337757
DHX40	DEAH (Asp-Glu-Ala-His) box polypeptide 40 [Source:HGNC Symbol;Acc:18018]	ENSG00000108406	ENSP00000388749
DHX38	DEAH (Asp-Glu-Ala-His) box polypeptide 38 [Source:HGNC Symbol;Acc:17211]	ENSG00000140829	ENSP00000268482
TRMT61B	tRNA methyltransferase 61 homolog B (S. cerevisiae) [Source:HGNC Symbol;Acc:26070]	ENSG00000171103	ENSP00000302801
CSDC2	cold shock domain containing C2, RNA binding [Source:HGNC Symbol;Acc:30359]	ENSG00000172346	ENSP00000417127
CARHSP1	calcium regulated heat stable protein 1, 24kDa [Source:HGNC Symbol;Acc:17150]	ENSG00000153048	ENSP00000455855
POP4	processing of precursor 4, ribonuclease P/MRP subunit (S. cerevisiae) [Source:HGNC Symbol;Acc:30081]	ENSG00000105171	ENSP00000465213
LARP6	La ribonucleoprotein domain family, member 6 [Source:HGNC Symbol;Acc:24012]	ENSG00000166173	ENSP00000299213
RNPC3	RNA-binding region (RNP1, RRM) containing 3 [Source:HGNC Symbol;Acc:18666]	ENSG00000185946	ENSP00000391432
RPL30	ribosomal protein L30 [Source:HGNC Symbol;Acc:10333]	ENSG00000156482	ENSP00000428085
RUVBL2	RuvB-like 2 (E. coli) [Source:HGNC Symbol;Acc:10475] [Type: protein coding Ensembl/Havana merge]	ENSG00000183207	ENSP00000473172
DRG1	developmentally regulated GTP binding protein 1 [Source:HGNC Symbol;Acc:3029]	ENSG00000185721	ENSP00000329715
TRIM25	tripartite motif containing 25 [Source:HGNC Symbol;Acc:12932]	ENSG00000121060	ENSP00000323889
RQCD1	RCD1 required for cell differentiation1 homolog (S. pombe) [Source:HGNC Symbol;Acc:10445]	ENSG00000144580	ENSP00000273064
MRPS18C	mitochondrial ribosomal protein S18C [Source:HGNC Symbol;Acc:16633]	ENSG00000163319	ENSP00000295491
MRPL45	mitochondrial ribosomal protein L45 [Source:HGNC Symbol;Acc:16651]	ENSG00000174100	ENSP00000308901
RPLP2	ribosomal protein, large, P2 [Source:HGNC Symbol;Acc:10377]	ENSG00000177600	ENSP00000322419
SRP19	signal recognition particle 19kDa [Source:HGNC Symbol;Acc:11300]	ENSG00000153037	ENSP00000424870
RPS24	ribosomal protein S24 [Source:HGNC Symbol;Acc:10411]	ENSG00000138326	ENSP00000415549
AKAP17A	A kinase (PRKA) anchor protein 17A [Source:HGNC Symbol;Acc:18783]	ENSG00000197976	ENSP00000324827
NXT2	nuclear transport factor 2-like export factor 2 [Source:HGNC Symbol;Acc:18151]	ENSG00000101888	ENSP00000361178
NXT1	NTF2-like export factor 1 [Source:HGNC Symbol;Acc:15913]	ENSG00000132661	ENSP00000254998
MRPL9	mitochondrial ribosomal protein L9 [Source:HGNC Symbol;Acc:14277]	ENSG00000143436	ENSP00000357823
RPL27	ribosomal protein L27 [Source:HGNC Symbol;Acc:10328]	ENSG00000131469	ENSP00000253788
RPL24	ribosomal protein L24 [Source:HGNC Symbol;Acc:10325]	ENSG00000114391	ENSP00000377640
CNOT10	CCR4-NOT transcription complex, subunit 10 [Source:HGNC Symbol;Acc:23817]	ENSG00000182973	ENSP00000399862
ABT1	activator of basal transcription 1 [Source:HGNC Symbol;Acc:17369]	ENSG00000146109	ENSP00000274849
DDX25	DEAD (Asp-Glu-Ala-Asp) box helicase 25 [Source:HGNC Symbol;Acc:18698]	ENSG00000109832	ENSP00000463333
DDX19A	DEAD (Asp-Glu-Ala-Asp) box polypeptide 19A [Source:HGNC Symbol;Acc:25628]	ENSG00000168872	ENSP00000399208
DDX19B	Uncharacterized protein [Source:UniProtKB/TrEMBL;Acc:H3BN59]	ENSG00000260537	ENSP00000454699
MRPS30	mitochondrial ribosomal protein S30 [Source:HGNC Symbol;Acc:8769]	ENSG00000112996	ENSP00000424328
SMG1	smg-1 homolog, phosphatidylinositol 3-kinase-related kinase (C. elegans) [Source:HGNC Symbol;Acc:30045]	ENSG00000157106	ENSP00000402515
EXOSC5	exosome component 5 [Source:HGNC Symbol;Acc:24662]	ENSG00000077348	ENSP00000471002
AIMP2	aminoacyl tRNA synthetase complex-interacting multifunctional protein 2 [Source:HGNC Symbol;Acc:20609]	ENSG00000106305	ENSP00000223029
BZW2	basic leucine zipper and W2 domains 2 [Source:HGNC Symbol;Acc:18808]	ENSG00000136261	ENSP00000385577
BZW1	basic leucine zipper and W2 domains 1 [Source:HGNC Symbol;Acc:18380]	ENSG00000082153	ENSP00000395673
PARS2	prolyl-tRNA synthetase 2, mitochondrial (putative) [Source:HGNC Symbol;Acc:30563]	ENSG00000162396	ENSP00000360327
INTS12	integrator complex subunit 12 [Source:HGNC Symbol;Acc:25067] [Type: protein coding Ensembl/Havana merge]	ENSG00000138785	ENSP00000415433
EIF3H	eukaryotic translation initiation factor 3, subunit H [Source:HGNC Symbol;Acc:3273]	ENSG00000147677	ENSP00000429931
SKIV2L	superkiller viralicidic activity 2-like (S. cerevisiae) [Source:HGNC Symbol;Acc:10898]	ENSG00000223493	ENSP00000412310
RC3H2	ring finger and CCCH-type domains 2 [Source:HGNC Symbol;Acc:21461]	ENSG00000056586	ENSP00000411767
RC3H1	ring finger and CCCH-type domains 1 [Source:HGNC Symbol;Acc:29434]	ENSG00000135870	ENSP00000356667
ZFP36	ZFP36 ring finger protein [Source:HGNC Symbol;Acc:12862]	ENSG00000128016	ENSP00000248673
ZFP36L1	ZFP36 ring finger protein-like 1 [Source:HGNC Symbol;Acc:1107]	ENSG00000185650	ENSP00000450784
ZFP36L2	ZFP36 ring finger protein-like 2 [Source:HGNC Symbol;Acc:1108]	ENSG00000152518	ENSP00000282388
ANKHD1	ankyrin repeat and KH domain containing 1 [Source:HGNC Symbol;Acc:24714]	ENSG00000131503	ENSP00000354085
ANKRD17	ankyrin repeat domain 17 [Source:HGNC Symbol;Acc:23575]	ENSG00000132466	ENSP00000351416
HELZ2	helicase with zinc finger 2, transcriptional coactivator [Source:HGNC Symbol;Acc:30021]	ENSG00000130589	ENSP00000393257
UPF1	UPF1 regulator of nonsense transcripts homolog (yeast) [Source:HGNC Symbol;Acc:9962]	ENSG00000005007	ENSP00000262803
DROSHA	drosha, ribonuclease type III [Source:HGNC Symbol;Acc:17904]	ENSG00000113360	ENSP00000409335
MRPL37	mitochondrial ribosomal protein L37 [Source:HGNC Symbol;Acc:14034]	ENSG00000116221	ENSP00000354086
PUS10	pseudouridylate synthase 10 [Source:HGNC Symbol;Acc:26505]	ENSG00000162927	ENSP00000326003
NUDT16	nudix (nucleoside diphosphate linked moiety X)-type motif 16 [Source:HGNC Symbol;Acc:26442]	ENSG00000198585	ENSP00000429274
NUDT16L1	nudix (nucleoside diphosphate linked moiety X)-type motif 16-like 1 [Source:HGNC Symbol;Acc:28154]	ENSG00000168101	ENSP00000306670
TRMT11	tRNA methyltransferase 11 homolog (S. cerevisiae) [Source:HGNC Symbol;Acc:21080]	ENSG00000066651	ENSP00000333934
PET112	PET112 homolog (yeast) [Source:HGNC Symbol;Acc:8849]	ENSG00000059691	ENSP00000426859
NUFIP1	nuclear fragile X mental retardation protein interacting protein 1 [Source:HGNC Symbol;Acc:8057]	ENSG00000083635	ENSP00000368459
PURA	purine-rich element binding protein A [Source:HGNC Symbol;Acc:9701]	ENSG00000185129	ENSP00000332706
PURB	purine-rich element binding protein B [Source:HGNC Symbol;Acc:9702]	ENSG00000146676	ENSP00000379051
PURG	purine-rich element binding protein G [Source:HGNC Symbol;Acc:17930]	ENSG00000172733	ENSP00000345168
ZRANB2	zinc finger, RAN-binding domain containing 2 [Source:HGNC Symbol;Acc:13058]	ENSG00000132485	ENSP00000254821
THOC5	THO complex 5 [Source:HGNC Symbol;Acc:19074]	ENSG00000100296	ENSP00000420306
TSEN54	tRNA splicing endonuclease 54 homolog (S. cerevisiae) [Source:HGNC Symbol;Acc:27561]	ENSG00000182173	ENSP00000327487
SRP9	signal recognition particle 9kDa [Source:HGNC Symbol;Acc:11304]	ENSG00000143742	ENSP00000355803
PIN4	protein (peptidylprolyl cis/trans isomerase) NIMA-interacting, 4 (parvulin) [Source:HGNC Symbol;Acc:8992]	ENSG00000102309	ENSP00000362773
ZC3H14	zinc finger CCCH-type containing 14 [Source:HGNC Symbol;Acc:20509]	ENSG00000100722	ENSP00000452370
CNOT2	CCR4-NOT transcription complex, subunit 2 [Source:HGNC Symbol;Acc:7878]	ENSG00000111596	ENSP00000446507
TARBP1	TAR (HIV-1) RNA binding protein 1 [Source:HGNC Symbol;Acc:11568]	ENSG00000059588	ENSP00000040877
AGO1	eukaryotic translation initiation factor 2C, 1 [Source:HGNC Symbol;Acc:3262]	ENSG00000092847	ENSP00000362300
AGO2	eukaryotic translation initiation factor 2C, 2 [Source:HGNC Symbol;Acc:3263]	ENSG00000123908	ENSP00000220592
AGO3	eukaryotic translation initiation factor 2C, 3 [Source:HGNC Symbol;Acc:18421]	ENSG00000126070	ENSP00000362287
AGO4	eukaryotic translation initiation factor 2C, 4 [Source:HGNC Symbol;Acc:18424]	ENSG00000134698	ENSP00000362306
LARP4B	La ribonucleoprotein domain family, member 4B [Source:HGNC Symbol;Acc:28987]	ENSG00000107929	ENSP00000326128
LARP4	La ribonucleoprotein domain family, member 4 [Source:HGNC Symbol;Acc:24320]	ENSG00000161813	ENSP00000293618
SNW1	SNW domain containing 1 [Source:HGNC Symbol;Acc:16696] [Type: protein coding Ensembl/Havana merge]	ENSG00000100603	ENSP00000261531
EZH2	enhancer of zeste homolog 2 (Drosophila) [Source:HGNC Symbol;Acc:3527]	ENSG00000106462	ENSP00000320147
EIF3B	eukaryotic translation initiation factor 3, subunit B [Source:HGNC Symbol;Acc:3280]	ENSG00000106263	ENSP00000354125
RPP30	ribonuclease P/MRP 30kDa subunit [Source:HGNC Symbol;Acc:17688]	ENSG00000148688	ENSP00000389182
ZMAT3	zinc finger, matrin-type 3 [Source:HGNC Symbol;Acc:29983]	ENSG00000172667	ENSP00000311221
PTGES3	prostaglandin E synthase 3 (cytosolic) [Source:HGNC Symbol;Acc:16049]	ENSG00000110958	ENSP00000262033
KARS	lysyl-tRNA synthetase [Source:HGNC Symbol;Acc:6215]	ENSG00000065427	ENSP00000462057
RAN	RAN, member RAS oncogene family [Source:HGNC Symbol;Acc:9846]	ENSG00000132341	ENSP00000446215
SNRPA	small nuclear ribonucleoprotein polypeptide A [Source:HGNC Symbol;Acc:11151]	ENSG00000077312	ENSP00000243563
SNRPB2	small nuclear ribonucleoprotein polypeptide B [Source:HGNC Symbol;Acc:11155]	ENSG00000125870	ENSP00000246071
HEATR1	HEAT repeat containing 1 [Source:HGNC Symbol;Acc:25517]	ENSG00000119285	ENSP00000355541
PTGES3L-AARSD1	PTGES3L-AARSD1 readthrough [Source:HGNC Symbol;Acc:43946]	ENSG00000108825	ENSP00000409924
AARSD1	alanyl-tRNA synthetase domain containing 1 [Source:HGNC Symbol;Acc:28417]	ENSG00000266967	ENSP00000400870
CPSF3	cleavage and polyadenylation specific factor 3, 73kDa [Source:HGNC Symbol;Acc:2326]	ENSG00000119203	ENSP00000238112
CPSF3L	cleavage and polyadenylation specific factor 3-like [Source:HGNC Symbol;Acc:26052]	ENSG00000127054	ENSP00000392848
CWC25	CWC25 spliceosome-associated protein homolog (S. cerevisiae) [Source:HGNC Symbol;Acc:25989]	ENSG00000108296	ENSP00000225428
RPS5	ribosomal protein S5 [Source:HGNC Symbol;Acc:10426]	ENSG00000083845	ENSP00000196551
POLR2D	polymerase (RNA) II (DNA directed) polypeptide D [Source:HGNC Symbol;Acc:9191]	ENSG00000144231	ENSP00000272645
C9orf114	chromosome 9 open reading frame 114 [Source:HGNC Symbol;Acc:26933]	ENSG00000198917	ENSP00000354812
MRPL44	mitochondrial ribosomal protein L44 [Source:HGNC Symbol;Acc:16650]	ENSG00000135900	ENSP00000258383
ETF1	eukaryotic translation termination factor 1 [Source:HGNC Symbol;Acc:3477]	ENSG00000120705	ENSP00000353741
GAR1	GAR1 ribonucleoprotein homolog (yeast) [Source:HGNC Symbol;Acc:14264]	ENSG00000109534	ENSP00000226796
MVP	major vault protein [Source:HGNC Symbol;Acc:7531]	ENSG00000013364	ENSP00000378760
RPF2	ribosome production factor 2 homolog (S. cerevisiae) [Source:HGNC Symbol;Acc:20870]	ENSG00000197498	ENSP00000402338
ZC3H18	zinc finger CCCH-type containing 18 [Source:HGNC Symbol;Acc:25091]	ENSG00000158545	ENSP00000455260
INTS5	integrator complex subunit 5 [Source:HGNC Symbol;Acc:29352]	ENSG00000185085	ENSP00000327889
INTS3	integrator complex subunit 3 [Source:HGNC Symbol;Acc:26153]	ENSG00000143624	ENSP00000398222
LSM6	LSM6 homolog, U6 small nuclear RNA associated (S. cerevisiae) [Source:HGNC Symbol;Acc:17017]	ENSG00000164167	ENSP00000296581
SNRPF	small nuclear ribonucleoprotein polypeptide F [Source:HGNC Symbol;Acc:11162]	ENSG00000139343	ENSP00000447751
TUT1	terminal uridylyl transferase 1, U6 snRNA-specific [Source:HGNC Symbol;Acc:26184]	ENSG00000149016	ENSP00000308000
MTPAP	mitochondrial poly(A) polymerase [Source:HGNC Symbol;Acc:25532]	ENSG00000107951	ENSP00000350820
EIF2AK1	eukaryotic translation initiation factor 2-alpha kinase 1 [Source:HGNC Symbol;Acc:24921]	ENSG00000086232	ENSP00000199389
EIF2AK2	eukaryotic translation initiation factor 2-alpha kinase 2 [Source:HGNC Symbol;Acc:9437]	ENSG00000055332	ENSP00000233057
EIF2AK3	eukaryotic translation initiation factor 2-alpha kinase 3 [Source:HGNC Symbol;Acc:3255]	ENSG00000172071	ENSP00000307235
EIF2AK4	eukaryotic translation initiation factor 2 alpha kinase 4 [Source:HGNC Symbol;Acc:19687]	ENSG00000128829	ENSP00000263791
MRPL22	mitochondrial ribosomal protein L22 [Source:HGNC Symbol;Acc:14480]	ENSG00000082515	ENSP00000429039
PES1	pescadillo ribosomal biogenesis factor 1 [Source:HGNC Symbol;Acc:8848]	ENSG00000100029	ENSP00000384252
LSM7	LSM7 homolog, U6 small nuclear RNA associated (S. cerevisiae) [Source:HGNC Symbol;Acc:20470]	ENSG00000130332	ENSP00000252622
PAPD4	PAP associated domain containing 4 [Source:HGNC Symbol;Acc:26776]	ENSG00000164329	ENSP00000397563
ZCCHC11	zinc finger, CCHC domain containing 11 [Source:HGNC Symbol;Acc:28981]	ENSG00000134744	ENSP00000257177
ZCCHC6	zinc finger, CCHC domain containing 6 [Source:HGNC Symbol;Acc:25817]	ENSG00000083223	ENSP00000365130
KHDRBS1	KH domain containing, RNA binding, signal transduction associated 1 [Source:HGNC Symbol;Acc:18116]	ENSG00000121774	ENSP00000313829
KHDRBS2	KH domain containing, RNA binding, signal transduction associated 2 [Source:HGNC Symbol;Acc:18114]	ENSG00000112232	ENSP00000281156
KHDRBS3	KH domain containing, RNA binding, signal transduction associated 3 [Source:HGNC Symbol;Acc:18117]	ENSG00000131773	ENSP00000431022
QKI	QKI, KH domain containing, RNA binding [Source:HGNC Symbol;Acc:21100]	ENSG00000112531	ENSP00000275262
SF1	splicing factor 1 [Source:HGNC Symbol;Acc:12950]	ENSG00000168066	ENSP00000396793
LRRC47	leucine rich repeat containing 47 [Source:HGNC Symbol;Acc:29207]	ENSG00000130764	ENSP00000367498
ISY1	ISY1 splicing factor homolog (S. cerevisiae) [Source:HGNC Symbol;Acc:29201]	ENSG00000240682	ENSP00000376973
SRRM1	serine/arginine repetitive matrix 1 [Source:HGNC Symbol;Acc:16638]	ENSG00000133226	ENSP00000469151
IPO9	importin 9 [Source:HGNC Symbol;Acc:19425]	ENSG00000198700	ENSP00000354742
MTRF1	mitochondrial translational release factor 1 [Source:HGNC Symbol;Acc:7469]	ENSG00000120662	ENSP00000400031
MTRF1L	mitochondrial translational release factor 1-like [Source:HGNC Symbol;Acc:21051]	ENSG00000112031	ENSP00000356202
WIBG	within bgcn homolog (Drosophila) [Source:HGNC Symbol;Acc:30258]	ENSG00000170473	ENSP00000381271
PPAN	peter pan homolog (Drosophila) [Source:HGNC Symbol;Acc:9227]	ENSG00000130810	ENSP00000450710
FUBP3	far upstream element (FUSE) binding protein 3 [Source:HGNC Symbol;Acc:4005]	ENSG00000107164	ENSP00000318177
FUBP1	far upstream element (FUSE) binding protein 1 [Source:HGNC Symbol;Acc:4004]	ENSG00000162613	ENSP00000389536
KHSRP	KH-type splicing regulatory protein [Source:HGNC Symbol;Acc:6316]	ENSG00000088247	ENSP00000381216
CHTOP	chromatin target of PRMT1 [Source:HGNC Symbol;Acc:24511] [Type: protein coding Ensembl/Havana merge]	ENSG00000160679	ENSP00000357683
PTCD2	pentatricopeptide repeat domain 2 [Source:HGNC Symbol;Acc:25734]	ENSG00000049883	ENSP00000370013
POLR2A	polymerase (RNA) II (DNA directed) polypeptide A, 220kDa [Source:HGNC Symbol;Acc:9187]	ENSG00000181222	ENSP00000314949
MRPL43	mitochondrial ribosomal protein L43 [Source:HGNC Symbol;Acc:14517]	ENSG00000055950	ENSP00000359256
DDX55	DEAD (Asp-Glu-Ala-Asp) box polypeptide 55 [Source:HGNC Symbol;Acc:20085]	ENSG00000111364	ENSP00000238146
RPS15	ribosomal protein S15 [Source:HGNC Symbol;Acc:10388]	ENSG00000115268	ENSP00000465055
CPSF4	cleavage and polyadenylation specific factor 4, 30kDa [Source:HGNC Symbol;Acc:2327]	ENSG00000160917	ENSP00000402224
CPSF4L	cleavage and polyadenylation specific factor 4-like [Source:HGNC Symbol;Acc:33632]	ENSG00000187959	ENSP00000380788
CSTF2	cleavage stimulation factor, 3' pre-RNA, subunit 2, 64kDa [Source:HGNC Symbol;Acc:2484]	ENSG00000101811	ENSP00000387996
CSTF2T	cleavage stimulation factor, 3' pre-RNA, subunit 2, 64kDa, tau variant [Source:HGNC Symbol;Acc:17086]	ENSG00000177613	ENSP00000332444
RAVER2	ribonucleoprotein, PTB-binding 2 [Source:HGNC Symbol;Acc:25577]	ENSG00000162437	ENSP00000294428
RAVER1	ribonucleoprotein, PTB-binding 1 [Source:HGNC Symbol;Acc:30296]	ENSG00000161847	ENSP00000293677
EIF1AX	eukaryotic translation initiation factor 1A, X-linked [Source:HGNC Symbol;Acc:3250]	ENSG00000173674	ENSP00000368927
EIF1AY	eukaryotic translation initiation factor 1A, Y-linked [Source:HGNC Symbol;Acc:3252]	ENSG00000198692	ENSP00000354722
DALRD3	DALR anticodon binding domain containing 3 [Source:HGNC Symbol;Acc:25536]	ENSG00000178149	ENSP00000396650
NSUN2	NOP2/Sun RNA methyltransferase family, member 2 [Source:HGNC Symbol;Acc:25994]	ENSG00000037474	ENSP00000420957
URB2	URB2 ribosome biogenesis 2 homolog (S. cerevisiae) [Source:HGNC Symbol;Acc:28967]	ENSG00000135763	ENSP00000258243
PHAX	phosphorylated adaptor for RNA export [Source:HGNC Symbol;Acc:10241]	ENSG00000164902	ENSP00000297540
PPARGC1A	peroxisome proliferator-activated receptor gamma, coactivator 1 alpha [Source:HGNC Symbol;Acc:9237]	ENSG00000109819	ENSP00000264867
PPARGC1B	peroxisome proliferator-activated receptor gamma, coactivator 1 beta [Source:HGNC Symbol;Acc:30022]	ENSG00000155846	ENSP00000312649
PPRC1	peroxisome proliferator-activated receptor gamma, coactivator-related 1 [Source:HGNC Symbol;Acc:30025]	ENSG00000148840	ENSP00000359029
PHF5A	PHD finger protein 5A [Source:HGNC Symbol;Acc:18000]	ENSG00000100410	ENSP00000216252
MCTS1	malignant T cell amplified sequence 1 [Source:HGNC Symbol;Acc:23357]	ENSG00000232119	ENSP00000360367
RRP7A	ribosomal RNA processing 7 homolog A (S. cerevisiae) [Source:HGNC Symbol;Acc:24286]	ENSG00000189306	ENSP00000321449
DGCR8	DiGeorge syndrome critical region gene 8 [Source:HGNC Symbol;Acc:2847]	ENSG00000128191	ENSP00000263209
ZC3H13	zinc finger CCCH-type containing 13 [Source:HGNC Symbol;Acc:20368]	ENSG00000123200	ENSP00000282007
UPF3A	UPF3 regulator of nonsense transcripts homolog A (yeast) [Source:HGNC Symbol;Acc:20332]	ENSG00000169062	ENSP00000364448
UPF3B	UPF3 regulator of nonsense transcripts homolog B (yeast) [Source:HGNC Symbol;Acc:20439]	ENSG00000125351	ENSP00000245418
RBM24	RNA binding motif protein 24 [Source:HGNC Symbol;Acc:21539]	ENSG00000112183	ENSP00000426222
RBM38	RNA binding motif protein 38 [Source:HGNC Symbol;Acc:15818]	ENSG00000132819	ENSP00000407848
THOC3	THO complex 3 [Source:HGNC Symbol;Acc:19072]	ENSG00000051596	ENSP00000265097
IGHMBP2	immunoglobulin mu binding protein 2 [Source:HGNC Symbol;Acc:5542]	ENSG00000132740	ENSP00000255078
PAPD5	PAP associated domain containing 5 [Source:HGNC Symbol;Acc:30758]	ENSG00000121274	ENSP00000396995
PAPD7	PAP associated domain containing 7 [Source:HGNC Symbol;Acc:16705]	ENSG00000112941	ENSP00000230859
GFM2	G elongation factor, mitochondrial 2 [Source:HGNC Symbol;Acc:29682]	ENSG00000164347	ENSP00000427004
PHRF1	PHD and ring finger domains 1 [Source:HGNC Symbol;Acc:24351] [Type: protein coding Ensembl/Havana merge]	ENSG00000070047	ENSP00000410626
VARS	valyl-tRNA synthetase [Source:HGNC Symbol;Acc:12651]	ENSG00000096171	ENSP00000211402
VARS2	valyl-tRNA synthetase 2, mitochondrial [Source:HGNC Symbol;Acc:21642]	ENSG00000137411	ENSP00000316092
MRPL1	mitochondrial ribosomal protein L1 [Source:HGNC Symbol;Acc:14275]	ENSG00000169288	ENSP00000426575
INTS7	integrator complex subunit 7 [Source:HGNC Symbol;Acc:24484] [Type: protein coding Ensembl/Havana merge]	ENSG00000143493	ENSP00000355961
ATXN2L	ataxin 2-like [Source:HGNC Symbol;Acc:31326]	ENSG00000168488	ENSP00000372133
ATXN2	ataxin 2 [Source:HGNC Symbol;Acc:10555]	ENSG00000204842	ENSP00000445583
PPIL4	peptidylprolyl isomerase (cyclophilin)-like 4 [Source:HGNC Symbol;Acc:15702]	ENSG00000131013	ENSP00000253329
PPIL3	peptidylprolyl isomerase (cyclophilin)-like 3 [Source:HGNC Symbol;Acc:9262]	ENSG00000240344	ENSP00000286175
PPWD1	peptidylprolyl isomerase domain and WD repeat containing 1 [Source:HGNC Symbol;Acc:28954]	ENSG00000113593	ENSP00000261308
CWC27	CWC27 spliceosome-associated protein homolog (S. cerevisiae) [Source:HGNC Symbol;Acc:10664]	ENSG00000153015	ENSP00000370460
PPIH	peptidylprolyl isomerase H (cyclophilin H) [Source:HGNC Symbol;Acc:14651]	ENSG00000171960	ENSP00000306614
NUTF2	nuclear transport factor 2 [Source:HGNC Symbol;Acc:13722]	ENSG00000102898	ENSP00000457022
MRPL18	mitochondrial ribosomal protein L18 [Source:HGNC Symbol;Acc:14477]	ENSG00000112110	ENSP00000356001
LSM11	LSM11, U7 small nuclear RNA associated [Source:HGNC Symbol;Acc:30860]	ENSG00000155858	ENSP00000286307
AARS2	alanyl-tRNA synthetase 2, mitochondrial [Source:HGNC Symbol;Acc:21022]	ENSG00000124608	ENSP00000244571
AARS	alanyl-tRNA synthetase [Source:HGNC Symbol;Acc:20]	ENSG00000090861	ENSP00000261772
MIF4GD	MIF4G domain containing [Source:HGNC Symbol;Acc:24030]	ENSG00000125457	ENSP00000463493
CTIF	CBP80/20-dependent translation initiation factor [Source:HGNC Symbol;Acc:23925]	ENSG00000134030	ENSP00000372459
C9orf129	chromosome 9 open reading frame 129 [Source:HGNC Symbol;Acc:31116]	ENSG00000204352	ENSP00000364568
LUC7L2	C7orf55-LUC7L2 protein [Source:RefSeq peptide;Acc:NP_001231513]	ENSG00000269955	ENSP00000440222
LUC7L3	LUC7-like 3 (S. cerevisiae) [Source:HGNC Symbol;Acc:24309]	ENSG00000108848	ENSP00000376919
LUC7L	LUC7-like (S. cerevisiae) [Source:HGNC Symbol;Acc:6723]	ENSG00000007392	ENSP00000293872
DUS2	dihydrouridine synthase 2-like, SMM1 homolog (S. cerevisiae) [Source:HGNC Symbol;Acc:26014]	ENSG00000167264	ENSP00000409498
RNF17	ring finger protein 17 [Source:HGNC Symbol;Acc:10060]	ENSG00000132972	ENSP00000255324
TDRD1	tudor domain containing 1 [Source:HGNC Symbol;Acc:11712]	ENSG00000095627	ENSP00000358288
MRPS10	mitochondrial ribosomal protein S10 [Source:HGNC Symbol;Acc:14502]	ENSG00000048544	ENSP00000053468
FAM103A1	family with sequence similarity 103, member A1 [Source:HGNC Symbol;Acc:31022]	ENSG00000169612	ENSP00000307181
ENOX1	ecto-NOX disulfide-thiol exchanger 1 [Source:HGNC Symbol;Acc:25474]	ENSG00000120658	ENSP00000415054
ENOX2	ecto-NOX disulfide-thiol exchanger 2 [Source:HGNC Symbol;Acc:2259]	ENSG00000165675	ENSP00000359965
RBPMS	RNA binding protein with multiple splicing [Source:HGNC Symbol;Acc:19097]	ENSG00000157110	ENSP00000318102
RBPMS2	RNA binding protein with multiple splicing 2 [Source:HGNC Symbol;Acc:19098]	ENSG00000166831	ENSP00000300069
NIP7	nuclear import 7 homolog (S. cerevisiae) [Source:HGNC Symbol;Acc:24328]	ENSG00000132603	ENSP00000464159
RPL3	ribosomal protein L3 [Source:HGNC Symbol;Acc:10332]	ENSG00000100316	ENSP00000386101
RPL3L	ribosomal protein L3-like [Source:HGNC Symbol;Acc:10351]	ENSG00000140986	ENSP00000268661
RNASE11	ribonuclease, RNase A family, 11 (non-active) [Source:HGNC Symbol;Acc:19269]	ENSG00000173464	ENSP00000381093
RNASE12	Probable inactive ribonuclease-like protein 12 [Source:UniProtKB/Swiss-Prot;Acc:Q5GAN4]	ENSG00000258436	ENSP00000450580
RPLP0	ribosomal protein, large, P0 [Source:HGNC Symbol;Acc:10371]	ENSG00000089157	ENSP00000366471
RBM34	RNA binding motif protein 34 [Source:HGNC Symbol;Acc:28965]	ENSG00000188739	ENSP00000355565
CMTR2	cap methyltransferase 2 [Source:HGNC Symbol;Acc:25635]	ENSG00000180917	ENSP00000411148
ENDOU	endonuclease, polyU-specific [Source:HGNC Symbol;Acc:14369]	ENSG00000111405	ENSP00000397679
PUM1	pumilio homolog 1 (Drosophila) [Source:HGNC Symbol;Acc:14957]	ENSG00000134644	ENSP00000433850
PUM2	pumilio homolog 2 (Drosophila) [Source:HGNC Symbol;Acc:14958]	ENSG00000055917	ENSP00000385992
TYW5	tRNA-yW synthesizing protein 5 [Source:HGNC Symbol;Acc:26754]	ENSG00000162971	ENSP00000346627
TYW3	tRNA-yW synthesizing protein 3 homolog (S. cerevisiae) [Source:HGNC Symbol;Acc:24757]	ENSG00000162623	ENSP00000359904
TRMT1	tRNA methyltransferase 1 homolog (S. cerevisiae) [Source:HGNC Symbol;Acc:25980]	ENSG00000104907	ENSP00000466967
RAE1	RAE1 RNA export 1 homolog (S. pombe) [Source:HGNC Symbol;Acc:9828]	ENSG00000101146	ENSP00000379182
SLU7	SLU7 splicing factor homolog (S. cerevisiae) [Source:HGNC Symbol;Acc:16939]	ENSG00000164609	ENSP00000297151
EIF2B4	eukaryotic translation initiation factor 2B, subunit 4 delta, 67kDa [Source:HGNC Symbol;Acc:3260]	ENSG00000115211	ENSP00000394397
EIF5B	eukaryotic translation initiation factor 5B [Source:HGNC Symbol;Acc:30793]	ENSG00000158417	ENSP00000289371
GPATCH1	G patch domain containing 1 [Source:HGNC Symbol;Acc:24658]	ENSG00000076650	ENSP00000170564
RPL36	ribosomal protein L36 [Source:HGNC Symbol;Acc:13631]	ENSG00000130255	ENSP00000464342
EEF1A1	eukaryotic translation elongation factor 1 alpha 1 [Source:HGNC Symbol;Acc:3189]	ENSG00000156508	ENSP00000339053
EEF1A2	eukaryotic translation elongation factor 1 alpha 2 [Source:HGNC Symbol;Acc:3192]	ENSG00000101210	ENSP00000217182
RRP8	ribosomal RNA processing 8, methyltransferase, homolog (yeast) [Source:HGNC Symbol;Acc:29030]	ENSG00000132275	ENSP00000254605
UBA52	ubiquitin A-52 residue ribosomal protein fusion product 1 [Source:HGNC Symbol;Acc:12458]	ENSG00000221983	ENSP00000472768
R3HDM1	R3H domain containing 1 [Source:HGNC Symbol;Acc:9757]	ENSG00000048991	ENSP00000264160
R3HDM2	R3H domain containing 2 [Source:HGNC Symbol;Acc:29167]	ENSG00000179912	ENSP00000385839
PA2G4	proliferation-associated 2G4, 38kDa [Source:HGNC Symbol;Acc:8550]	ENSG00000170515	ENSP00000302886
AAR2	AAR2 splicing factor homolog (S. cerevisiae) [Source:HGNC Symbol;Acc:15886]	ENSG00000131043	ENSP00000380455
ERI1	exoribonuclease 1 [Source:HGNC Symbol;Acc:23994]	ENSG00000104626	ENSP00000430190
ERI2	ERI1 exoribonuclease family member 2 [Source:HGNC Symbol;Acc:30541]	ENSG00000196678	ENSP00000454661
ERI3	ERI1 exoribonuclease family member 3 [Source:HGNC Symbol;Acc:17276]	ENSG00000117419	ENSP00000438360
NIFK	MKI67 (FHA domain) interacting nucleolar phosphoprotein [Source:HGNC Symbol;Acc:17838]	ENSG00000155438	ENSP00000285814
METTL14	methyltransferase like 14 [Source:HGNC Symbol;Acc:29330]	ENSG00000145388	ENSP00000373474
MRPL32	mitochondrial ribosomal protein L32 [Source:HGNC Symbol;Acc:14035]	ENSG00000106591	ENSP00000223324
CPSF6	cleavage and polyadenylation specific factor 6, 68kDa [Source:HGNC Symbol;Acc:13871]	ENSG00000111605	ENSP00000391774
CPSF7	cleavage and polyadenylation specific factor 7, 59kDa [Source:HGNC Symbol;Acc:30098]	ENSG00000149532	ENSP00000391359
RPL7A	ribosomal protein L7a [Source:HGNC Symbol;Acc:10364]	ENSG00000260501	ENSP00000455188
WDR46	WD repeat domain 46 [Source:HGNC Symbol;Acc:13923]	ENSG00000227057	ENSP00000363746
SRP14	signal recognition particle 14kDa (homologous Alu RNA binding protein) [Source:HGNC Symbol;Acc:11299]	ENSG00000140319	ENSP00000267884
TFAM	transcription factor A, mitochondrial [Source:HGNC Symbol;Acc:11741]	ENSG00000108064	ENSP00000420588
CMSS1	cms1 ribosomal small subunit homolog (yeast) [Source:HGNC Symbol;Acc:28666]	ENSG00000184220	ENSP00000410396
XPO6	exportin 6 [Source:HGNC Symbol;Acc:19733]	ENSG00000169180	ENSP00000302790
EXOSC1	exosome component 1 [Source:HGNC Symbol;Acc:17286]	ENSG00000171311	ENSP00000473303
ZNF106	zinc finger protein 106 [Source:HGNC Symbol;Acc:12886]	ENSG00000103994	ENSP00000454882
UTP14A	UTP14, U3 small nucleolar ribonucleoprotein, homolog A (yeast) [Source:HGNC Symbol;Acc:10665]	ENSG00000156697	ENSP00000413187
UTP14C	UTP14, U3 small nucleolar ribonucleoprotein, homolog C (yeast) [Source:HGNC Symbol;Acc:20321]	ENSG00000253797	ENSP00000428619
TRUB1	TruB pseudouridine (psi) synthase homolog 1 (E. coli) [Source:HGNC Symbol;Acc:16060]	ENSG00000165832	ENSP00000298746
TRUB2	TruB pseudouridine (psi) synthase homolog 2 (E. coli) [Source:HGNC Symbol;Acc:17170]	ENSG00000167112	ENSP00000438084
PRIM1	primase, DNA, polypeptide 1 (49kDa) [Source:HGNC Symbol;Acc:9369]	ENSG00000198056	ENSP00000350491
PTCD3	pentatricopeptide repeat domain 3 [Source:HGNC Symbol;Acc:24717] [Type: protein coding Ensembl/Havana merge]	ENSG00000132300	ENSP00000254630
HNRNPA0	heterogeneous nuclear ribonucleoprotein A0 [Source:HGNC Symbol;Acc:5030]	ENSG00000177733	ENSP00000316042
HNRNPA1	heterogeneous nuclear ribonucleoprotein A1 [Source:HGNC Symbol;Acc:5031]	ENSG00000135486	ENSP00000333504
HNRNPA1L2	heterogeneous nuclear ribonucleoprotein A1-like 2 [Source:HGNC Symbol;Acc:27067]	ENSG00000139675	ENSP00000350090
HNRNPA2B1	heterogeneous nuclear ribonucleoprotein A2/B1 [Source:HGNC Symbol;Acc:5033]	ENSG00000122566	ENSP00000346694
HNRNPA3	heterogeneous nuclear ribonucleoprotein A3 [Source:HGNC Symbol;Acc:24941]	ENSG00000170144	ENSP00000408487
HNRNPAB	heterogeneous nuclear ribonucleoprotein A/B [Source:HGNC Symbol;Acc:5034]	ENSG00000197451	ENSP00000425031
HNRNPD	heterogeneous nuclear ribonucleoprotein D (AU-rich element RNA binding protein 1, 37kDa) [Source:HGNC Symbol;Acc:5036]	ENSG00000138668	ENSP00000439380
HNRNPDL	heterogeneous nuclear ribonucleoprotein D-like [Source:HGNC Symbol;Acc:5037]	ENSG00000152795	ENSP00000295470
RANBP2	RAN binding protein 2 [Source:HGNC Symbol;Acc:9848]	ENSG00000153201	ENSP00000283195
RPL7	ribosomal protein L7 [Source:HGNC Symbol;Acc:10363]	ENSG00000147604	ENSP00000401300
RPL7L1	ribosomal protein L7-like 1 [Source:HGNC Symbol;Acc:21370]	ENSG00000146223	ENSP00000445293
RNASE13	ribonuclease, RNase A family, 13 (non-active) [Source:HGNC Symbol;Acc:25285]	ENSG00000206150	ENSP00000372410
RPS6	ribosomal protein S6 [Source:HGNC Symbol;Acc:10429]	ENSG00000137154	ENSP00000369757
MRPL3	mitochondrial ribosomal protein L3 [Source:HGNC Symbol;Acc:10379]	ENSG00000114686	ENSP00000398536
DDX28	DEAD (Asp-Glu-Ala-Asp) box polypeptide 28 [Source:HGNC Symbol;Acc:17330]	ENSG00000182810	ENSP00000332340
DDX47	DEAD (Asp-Glu-Ala-Asp) box polypeptide 47 [Source:HGNC Symbol;Acc:18682]	ENSG00000213782	ENSP00000319578
RNASEH2C	ribonuclease H2, subunit C [Source:HGNC Symbol;Acc:24116]	ENSG00000172922	ENSP00000432897
TFB2M	transcription factor B2, mitochondrial [Source:HGNC Symbol;Acc:18559]	ENSG00000162851	ENSP00000442426
TEP1	telomerase-associated protein 1 [Source:HGNC Symbol;Acc:11726]	ENSG00000129566	ENSP00000452574
NOC4L	nucleolar complex associated 4 homolog (S. cerevisiae) [Source:HGNC Symbol;Acc:28461]	ENSG00000184967	ENSP00000443336
CPSF1	cleavage and polyadenylation specific factor 1, 160kDa [Source:HGNC Symbol;Acc:2324]	ENSG00000071894	ENSP00000339353
DDX1	DEAD (Asp-Glu-Ala-Asp) box helicase 1 [Source:HGNC Symbol;Acc:2734]	ENSG00000079785	ENSP00000370745
DDX3X	DEAD (Asp-Glu-Ala-Asp) box polypeptide 3, X-linked [Source:HGNC Symbol;Acc:2745]	ENSG00000215301	ENSP00000392494
DDX3Y	DEAD (Asp-Glu-Ala-Asp) box polypeptide 3, Y-linked [Source:HGNC Symbol;Acc:2699]	ENSG00000067048	ENSP00000353284
DDX4	DEAD (Asp-Glu-Ala-Asp) box polypeptide 4 [Source:HGNC Symbol;Acc:18700]	ENSG00000152670	ENSP00000425359
NOP56	NOP56 ribonucleoprotein [Source:HGNC Symbol;Acc:15911]	ENSG00000101361	ENSP00000370589
RPS20	ribosomal protein S20 [Source:HGNC Symbol;Acc:10405]	ENSG00000008988	ENSP00000427860
MPHOSPH10	M-phase phosphoprotein 10 (U3 small nucleolar ribonucleoprotein) [Source:HGNC Symbol;Acc:7213]	ENSG00000124383	ENSP00000244230
MRM1	mitochondrial rRNA methyltransferase 1 homolog (S. cerevisiae) [Source:HGNC Symbol;Acc:26202]	ENSG00000129282	ENSP00000250156
DXO	dom-3 homolog Z (C. elegans) [Source:HGNC Symbol;Acc:2992]	ENSG00000236765	ENSP00000391123
DENR	density-regulated protein [Source:HGNC Symbol;Acc:2769]	ENSG00000139726	ENSP00000413661
RPL21	ribosomal protein L21 [Source:HGNC Symbol;Acc:10313]	ENSG00000122026	ENSP00000346027
RPS10	ribosomal protein S10 [Source:HGNC Symbol;Acc:10383]	ENSG00000124614	ENSP00000347271
NAT10	N-acetyltransferase 10 (GCN5-related) [Source:HGNC Symbol;Acc:29830]	ENSG00000135372	ENSP00000433011
UTP18	UTP18 small subunit (SSU) processome component homolog (yeast) [Source:HGNC Symbol;Acc:24274]	ENSG00000011260	ENSP00000225298
NOL12	nucleolar protein 12 [Source:HGNC Symbol;Acc:28585]	ENSG00000100101	ENSP00000352021
DDX31	DEAD (Asp-Glu-Ala-Asp) box polypeptide 31 [Source:HGNC Symbol;Acc:16715]	ENSG00000125485	ENSP00000387730
ABCF1	ATP-binding cassette, sub-family F (GCN20), member 1 [Source:HGNC Symbol;Acc:70]	ENSG00000225989	ENSP00000412553
DNMT1	DNA (cytosine-5-)-methyltransferase 1 [Source:HGNC Symbol;Acc:2976]	ENSG00000130816	ENSP00000352516
SNRPA1	small nuclear ribonucleoprotein polypeptide A' [Source:HGNC Symbol;Acc:11152]	ENSG00000131876	ENSP00000254193
API5	apoptosis inhibitor 5 [Source:HGNC Symbol;Acc:594]	ENSG00000166181	ENSP00000436189
SHQ1	SHQ1, H/ACA ribonucleoprotein assembly factor [Source:HGNC Symbol;Acc:25543]	ENSG00000144736	ENSP00000417452
AKAP1	A kinase (PRKA) anchor protein 1 [Source:HGNC Symbol;Acc:367]	ENSG00000121057	ENSP00000459895
FTO	fat mass and obesity associated [Source:HGNC Symbol;Acc:24678]	ENSG00000140718	ENSP00000418823
PUF60	poly-U binding splicing factor 60KDa [Source:HGNC Symbol;Acc:17042]	ENSG00000179950	ENSP00000431960
SAMHD1	SAM domain and HD domain 1 [Source:HGNC Symbol;Acc:15925]	ENSG00000101347	ENSP00000262878
RBM45	RNA binding motif protein 45 [Source:HGNC Symbol;Acc:24468]	ENSG00000155636	ENSP00000286070
FAM98B	family with sequence similarity 98, member B [Source:HGNC Symbol;Acc:26773]	ENSG00000171262	ENSP00000380734
FAM98A	family with sequence similarity 98, member A [Source:HGNC Symbol;Acc:24520]	ENSG00000119812	ENSP00000398490
FAM98C	family with sequence similarity 98, member C [Source:HGNC Symbol;Acc:27119]	ENSG00000130244	ENSP00000340348
PCF11	PCF11, cleavage and polyadenylation factor subunit, homolog (S. cerevisiae) [Source:HGNC Symbol;Acc:30097]	ENSG00000165494	ENSP00000298281
EIF5	eukaryotic translation initiation factor 5 [Source:HGNC Symbol;Acc:3299]	ENSG00000100664	ENSP00000376477
ZC3HC1	zinc finger, C3HC-type containing 1 [Source:HGNC Symbol;Acc:29913]	ENSG00000091732	ENSP00000309301
HNRNPC	heterogeneous nuclear ribonucleoprotein C (C1/C2) [Source:HGNC Symbol;Acc:5035]	ENSG00000092199	ENSP00000450669
HNRNPCL1	heterogeneous nuclear ribonucleoprotein C-like 1 [Source:HGNC Symbol;Acc:29295]	ENSG00000179172	ENSP00000365370
RALY	RNA binding protein, autoantigenic (hnRNP-associated with lethal yellow homolog (mouse)) [Source:HGNC Symbol;Acc:15921]	ENSG00000125970	ENSP00000415973
RALYL	RALY RNA binding protein-like [Source:HGNC Symbol;Acc:27036]	ENSG00000184672	ENSP00000430128
SEPSECS	Sep (O-phosphoserine) tRNA:Sec (selenocysteine) tRNA synthase [Source:HGNC Symbol;Acc:30605]	ENSG00000109618	ENSP00000371535
NPM1	nucleophosmin (nucleolar phosphoprotein B23, numatrin) [Source:HGNC Symbol;Acc:7910]	ENSG00000181163	ENSP00000341168
NPM3	nucleophosmin/nucleoplasmin 3 [Source:HGNC Symbol;Acc:7931]	ENSG00000107833	ENSP00000359128
NPM2	nucleophosmin/nucleoplasmin 2 [Source:HGNC Symbol;Acc:7930]	ENSG00000158806	ENSP00000289820
NUPL2	nucleoporin like 2 [Source:HGNC Symbol;Acc:17010]	ENSG00000136243	ENSP00000387330
MRPS14	mitochondrial ribosomal protein S14 [Source:HGNC Symbol;Acc:14049]	ENSG00000120333	ENSP00000420714
SF3A1	splicing factor 3a, subunit 1, 120kDa [Source:HGNC Symbol;Acc:10765]	ENSG00000099995	ENSP00000390336
EIF3A	eukaryotic translation initiation factor 3, subunit A [Source:HGNC Symbol;Acc:3271]	ENSG00000107581	ENSP00000358140
FASTKD5	FAST kinase domains 5 [Source:HGNC Symbol;Acc:25790]	ENSG00000215251	ENSP00000369618
TDRD3	tudor domain containing 3 [Source:HGNC Symbol;Acc:20612]	ENSG00000083544	ENSP00000440190
SNRPB	small nuclear ribonucleoprotein polypeptides B and B1 [Source:HGNC Symbol;Acc:11153]	ENSG00000125835	ENSP00000370746
SNRPN	small nuclear ribonucleoprotein polypeptide N [Source:HGNC Symbol;Acc:11164]	ENSG00000128739	ENSP00000408767
YRDC	yrdC domain containing (E. coli) [Source:HGNC Symbol;Acc:28905]	ENSG00000196449	ENSP00000362135
POLR2K	polymerase (RNA) II (DNA directed) polypeptide K, 7.0kDa [Source:HGNC Symbol;Acc:9198]	ENSG00000147669	ENSP00000342889
ERN2	endoplasmic reticulum to nucleus signaling 2 [Source:HGNC Symbol;Acc:16942]	ENSG00000134398	ENSP00000256797
ERN1	endoplasmic reticulum to nucleus signaling 1 [Source:HGNC Symbol;Acc:3449]	ENSG00000178607	ENSP00000401445
RPL5	ribosomal protein L5 [Source:HGNC Symbol;Acc:10360]	ENSG00000122406	ENSP00000359345
RPS17	ribosomal protein S17 [Source:HGNC Symbol;Acc:10397]	ENSG00000184779	ENSP00000453564
RPS17L	ribosomal protein S17-like [Source:HGNC Symbol;Acc:40029]	ENSG00000182774	ENSP00000453910
DARS	aspartyl-tRNA synthetase [Source:HGNC Symbol;Acc:2678]	ENSG00000115866	ENSP00000264161
IPO7	importin 7 [Source:HGNC Symbol;Acc:9852]	ENSG00000205339	ENSP00000369042
IPO8	importin 8 [Source:HGNC Symbol;Acc:9853]	ENSG00000133704	ENSP00000256079
SMN1	survival of motor neuron 1, telomeric [Source:HGNC Symbol;Acc:11117]	ENSG00000172062	ENSP00000305857
SMN2	survival of motor neuron 2, centromeric [Source:HGNC Symbol;Acc:11118]	ENSG00000205571	ENSP00000370117
GTPBP4	GTP binding protein 4 [Source:HGNC Symbol;Acc:21535]	ENSG00000107937	ENSP00000354040
MRPL13	mitochondrial ribosomal protein L13 [Source:HGNC Symbol;Acc:14278]	ENSG00000172172	ENSP00000430545
MRPL46	mitochondrial ribosomal protein L46 [Source:HGNC Symbol;Acc:1192]	ENSG00000259494	ENSP00000312311
LSM5	LSM5 homolog, U6 small nuclear RNA associated (S. cerevisiae) [Source:HGNC Symbol;Acc:17162]	ENSG00000106355	ENSP00000386707
EIF4G3	eukaryotic translation initiation factor 4 gamma, 3 [Source:HGNC Symbol;Acc:3298]	ENSG00000075151	ENSP00000264211
EIF4G1	eukaryotic translation initiation factor 4 gamma, 1 [Source:HGNC Symbol;Acc:3296]	ENSG00000114867	ENSP00000343450
EIF4G2	eukaryotic translation initiation factor 4 gamma, 2 [Source:HGNC Symbol;Acc:3297]	ENSG00000110321	ENSP00000433664
GTF2F1	general transcription factor IIF, polypeptide 1, 74kDa [Source:HGNC Symbol;Acc:4652] [Type: protein coding Ensembl/Havana merge]	ENSG00000125651	ENSP00000377969
RPS15A	ribosomal protein S15a [Source:HGNC Symbol;Acc:10389]	ENSG00000134419	ENSP00000318646
PIH1D2	PIH1 domain containing 2 [Source:HGNC Symbol;Acc:25210]	ENSG00000262740	ENSP00000460262
TTF2	transcription termination factor, RNA polymerase II [Source:HGNC Symbol;Acc:12398]	ENSG00000116830	ENSP00000358478
PUS3	pseudouridylate synthase 3 [Source:HGNC Symbol;Acc:25461]	ENSG00000110060	ENSP00000432386
RBM7	RNA binding motif protein 7 [Source:HGNC Symbol;Acc:9904]	ENSG00000076053	ENSP00000364639
RBM11	RNA binding motif protein 11 [Source:HGNC Symbol;Acc:9897]	ENSG00000185272	ENSP00000383421
TSEN2	tRNA splicing endonuclease 2 homolog (S. cerevisiae) [Source:HGNC Symbol;Acc:28422]	ENSG00000154743	ENSP00000284995
RBM42	RNA binding motif protein 42 [Source:HGNC Symbol;Acc:28117]	ENSG00000126254	ENSP00000466044
UTP3	UTP3, small subunit (SSU) processome component, homolog (S. cerevisiae) [Source:HGNC Symbol;Acc:24477]	ENSG00000132467	ENSP00000254803
HNRNPL	heterogeneous nuclear ribonucleoprotein L [Source:HGNC Symbol;Acc:5045]	ENSG00000104824	ENSP00000221419
HNRNPLL	heterogeneous nuclear ribonucleoprotein L-like [Source:HGNC Symbol;Acc:25127]	ENSG00000143889	ENSP00000386575
PTBP1	polypyrimidine tract binding protein 1 [Source:HGNC Symbol;Acc:9583]	ENSG00000011304	ENSP00000349428
PTBP2	polypyrimidine tract binding protein 2 [Source:HGNC Symbol;Acc:17662]	ENSG00000117569	ENSP00000359217
PTBP3	polypyrimidine tract binding protein 3 [Source:HGNC Symbol;Acc:10253]	ENSG00000119314	ENSP00000414921
SYMPK	symplekin [Source:HGNC Symbol;Acc:22935]	ENSG00000125755	ENSP00000245934
POLR2F	polymerase (RNA) II (DNA directed) polypeptide F [Source:HGNC Symbol;Acc:9193]	ENSG00000100142	ENSP00000403852
TSR2	TSR2, 20S rRNA accumulation, homolog (S. cerevisiae) [Source:HGNC Symbol;Acc:25455]	ENSG00000158526	ENSP00000364293
KIAA0391	mitochondrial ribonuclease P protein 3 isoform 4 [Source:RefSeq peptide;Acc:NP_001243609]	ENSG00000100890	ENSP00000450898
POLR2G	polymerase (RNA) II (DNA directed) polypeptide G [Source:HGNC Symbol;Acc:9194]	ENSG00000168002	ENSP00000301788
WDR5	WD repeat domain 5 [Source:HGNC Symbol;Acc:12757]	ENSG00000196363	ENSP00000351446
SNRNP40	small nuclear ribonucleoprotein 40kDa (U5) [Source:HGNC Symbol;Acc:30857]	ENSG00000060688	ENSP00000263694
WDR83	WD repeat domain 83 [Source:HGNC Symbol;Acc:32672]	ENSG00000123154	ENSP00000402653
ZFC3H1	zinc finger, C3H1-type containing [Source:HGNC Symbol;Acc:28328]	ENSG00000133858	ENSP00000368017
RPL15	ribosomal protein L15 [Source:HGNC Symbol;Acc:10306]	ENSG00000174748	ENSP00000387925
SNRNP35	small nuclear ribonucleoprotein 35kDa (U11/U12) [Source:HGNC Symbol;Acc:30852]	ENSG00000184209	ENSP00000432595
SNRNP70	small nuclear ribonucleoprotein 70kDa (U1) [Source:HGNC Symbol;Acc:11150]	ENSG00000104852	ENSP00000472998
MRPL39	mitochondrial ribosomal protein L39 [Source:HGNC Symbol;Acc:14027]	ENSG00000154719	ENSP00000305682
TLR7	toll-like receptor 7 [Source:HGNC Symbol;Acc:15631] [Type: protein coding Ensembl/Havana merge]	ENSG00000196664	ENSP00000370034
TLR8	toll-like receptor 8 [Source:HGNC Symbol;Acc:15632]	ENSG00000101916	ENSP00000218032
TLR3	toll-like receptor 3 [Source:HGNC Symbol;Acc:11849] [Type: protein coding Ensembl/Havana merge]	ENSG00000164342	ENSP00000296795
NAA38	N(alpha)-acetyltransferase 38, NatC auxiliary subunit [Source:HGNC Symbol;Acc:20471]	ENSG00000128534	ENSP00000403811
PRPF31	PRP31 pre-mRNA processing factor 31 homolog (S. cerevisiae) [Source:HGNC Symbol;Acc:15446]	ENSG00000105618	ENSP00000324122
MRPL55	mitochondrial ribosomal protein L55 [Source:HGNC Symbol;Acc:16686]	ENSG00000162910	ENSP00000337342
TRMT2A	tRNA methyltransferase 2 homolog A (S. cerevisiae) [Source:HGNC Symbol;Acc:24974]	ENSG00000099899	ENSP00000252136
TRMT2B	tRNA methyltransferase 2 homolog B (S. cerevisiae) [Source:HGNC Symbol;Acc:25748]	ENSG00000188917	ENSP00000362027
RPS3A	ribosomal protein S3A [Source:HGNC Symbol;Acc:10421]	ENSG00000145425	ENSP00000426466
BRCA1	breast cancer 1, early onset [Source:HGNC Symbol;Acc:1100]	ENSG00000012048	ENSP00000418960
RIOK2	RIO kinase 2 [Source:HGNC Symbol;Acc:18999]	ENSG00000058729	ENSP00000283109
DHX16	DEAH (Asp-Glu-Ala-His) box polypeptide 16 [Source:HGNC Symbol;Acc:2739]	ENSG00000206486	ENSP00000373071
DHX33	DEAH (Asp-Glu-Ala-His) box polypeptide 33 [Source:HGNC Symbol;Acc:16718]	ENSG00000005100	ENSP00000458925
DHX35	DEAH (Asp-Glu-Ala-His) box polypeptide 35 [Source:HGNC Symbol;Acc:15861]	ENSG00000101452	ENSP00000252011
DHX32	DEAH (Asp-Glu-Ala-His) box polypeptide 32 [Source:HGNC Symbol;Acc:16717]	ENSG00000089876	ENSP00000284688
DQX1	DEAQ box RNA-dependent ATPase 1 [Source:HGNC Symbol;Acc:20410]	ENSG00000144045	ENSP00000377523
DHX15	DEAH (Asp-Glu-Ala-His) box polypeptide 15 [Source:HGNC Symbol;Acc:2738]	ENSG00000109606	ENSP00000336741
DHX8	DEAH (Asp-Glu-Ala-His) box polypeptide 8 [Source:HGNC Symbol;Acc:2749]	ENSG00000067596	ENSP00000262415
MRPS5	mitochondrial ribosomal protein S5 [Source:HGNC Symbol;Acc:14498]	ENSG00000144029	ENSP00000272418
SAP18	Sin3A-associated protein, 18kDa [Source:HGNC Symbol;Acc:10530]	ENSG00000150459	ENSP00000391846
TUFM	Tu translation elongation factor, mitochondrial [Source:HGNC Symbol;Acc:12420]	ENSG00000178952	ENSP00000322439
EEFSEC	eukaryotic elongation factor, selenocysteine-tRNA-specific [Source:HGNC Symbol;Acc:24614]	ENSG00000132394	ENSP00000254730
TDRD12	tudor domain containing 12 [Source:HGNC Symbol;Acc:25044]	ENSG00000173809	ENSP00000416248
SKIV2L2	superkiller viralicidic activity 2-like 2 (S. cerevisiae) [Source:HGNC Symbol;Acc:18734]	ENSG00000039123	ENSP00000230640
TRDMT1	tRNA aspartic acid methyltransferase 1 [Source:HGNC Symbol;Acc:2977]	ENSG00000107614	ENSP00000367030
ZNF473	zinc finger protein 473 [Source:HGNC Symbol;Acc:23239]	ENSG00000142528	ENSP00000472808
FCF1	FCF1 small subunit (SSU) processome component homolog (S. cerevisiae) [Source:HGNC Symbol;Acc:20220]	ENSG00000119616	ENSP00000450750
URB1	URB1 ribosome biogenesis 1 homolog (S. cerevisiae) [Source:HGNC Symbol;Acc:17344]	ENSG00000142207	ENSP00000372199
CARS	cysteinyl-tRNA synthetase [Source:HGNC Symbol;Acc:1493]	ENSG00000110619	ENSP00000278224
CARS2	cysteinyl-tRNA synthetase 2, mitochondrial (putative) [Source:HGNC Symbol;Acc:25695]	ENSG00000134905	ENSP00000257347
CELF1	CUGBP, Elav-like family member 1 [Source:HGNC Symbol;Acc:2549]	ENSG00000149187	ENSP00000351409
CELF2	CUGBP, Elav-like family member 2 [Source:HGNC Symbol;Acc:2550]	ENSG00000048740	ENSP00000388530
CELF3	CUGBP, Elav-like family member 3 [Source:HGNC Symbol;Acc:11967]	ENSG00000159409	ENSP00000290585
CELF4	CUGBP, Elav-like family member 4 [Source:HGNC Symbol;Acc:14015]	ENSG00000101489	ENSP00000335631
CELF5	CUGBP, Elav-like family member 5 [Source:HGNC Symbol;Acc:14058]	ENSG00000161082	ENSP00000292672
CELF6	CUGBP, Elav-like family member 6 [Source:HGNC Symbol;Acc:14059]	ENSG00000140488	ENSP00000457863
XPO1	exportin 1 (CRM1 homolog, yeast) [Source:HGNC Symbol;Acc:12825]	ENSG00000082898	ENSP00000385559
DDX17	DEAD (Asp-Glu-Ala-Asp) box helicase 17 [Source:HGNC Symbol;Acc:2740]	ENSG00000100201	ENSP00000380033
DDX46	DEAD (Asp-Glu-Ala-Asp) box polypeptide 46 [Source:HGNC Symbol;Acc:18681]	ENSG00000145833	ENSP00000416534
DDX5	DEAD (Asp-Glu-Ala-Asp) box helicase 5 [Source:HGNC Symbol;Acc:2746]	ENSG00000263077	ENSP00000459637
DDX42	DEAD (Asp-Glu-Ala-Asp) box polypeptide 42 [Source:HGNC Symbol;Acc:18676]	ENSG00000198231	ENSP00000352308
DDX43	DEAD (Asp-Glu-Ala-Asp) box polypeptide 43 [Source:HGNC Symbol;Acc:18677]	ENSG00000080007	ENSP00000359361
DDX53	DEAD (Asp-Glu-Ala-Asp) box polypeptide 53 [Source:HGNC Symbol;Acc:20083]	ENSG00000184735	ENSP00000368667
FIP1L1	FIP1 like 1 (S. cerevisiae) [Source:HGNC Symbol;Acc:19124]	ENSG00000145216	ENSP00000423325
MRPL14	mitochondrial ribosomal protein L14 [Source:HGNC Symbol;Acc:14279]	ENSG00000180992	ENSP00000361084
TXNL4A	thioredoxin-like 4A [Source:HGNC Symbol;Acc:30551]	ENSG00000141759	ENSP00000269601
TXNL4B	thioredoxin-like 4B [Source:HGNC Symbol;Acc:26041]	ENSG00000140830	ENSP00000268483
RBM39	RNA binding motif protein 39 [Source:HGNC Symbol;Acc:15923]	ENSG00000131051	ENSP00000436747
RBM23	RNA binding motif protein 23 [Source:HGNC Symbol;Acc:20155]	ENSG00000100461	ENSP00000339220
CPEB1	cytoplasmic polyadenylation element binding protein 1 [Source:HGNC Symbol;Acc:21744]	ENSG00000214575	ENSP00000458081
CPEB2	cytoplasmic polyadenylation element binding protein 2 [Source:HGNC Symbol;Acc:21745]	ENSG00000137449	ENSP00000371838
CPEB3	cytoplasmic polyadenylation element binding protein 3 [Source:HGNC Symbol;Acc:21746]	ENSG00000107864	ENSP00000398310
CPEB4	cytoplasmic polyadenylation element binding protein 4 [Source:HGNC Symbol;Acc:21747]	ENSG00000113742	ENSP00000429048
INTS9	integrator complex subunit 9 [Source:HGNC Symbol;Acc:25592]	ENSG00000104299	ENSP00000429065
CACTIN	cactin, spliceosome C complex subunit [Source:HGNC Symbol;Acc:29938]	ENSG00000105298	ENSP00000415078
MPHOSPH6	M-phase phosphoprotein 6 [Source:HGNC Symbol;Acc:7214]	ENSG00000135698	ENSP00000456626
RPL34	ribosomal protein L34 [Source:HGNC Symbol;Acc:10340]	ENSG00000109475	ENSP00000378160
OBFC1	oligonucleotide/oligosaccharide-binding fold containing 1 [Source:HGNC Symbol;Acc:26200]	ENSG00000107960	ENSP00000358779
RPS12	ribosomal protein S12 [Source:HGNC Symbol;Acc:10385]	ENSG00000112306	ENSP00000230050
PRPF8	PRP8 pre-mRNA processing factor 8 homolog (S. cerevisiae) [Source:HGNC Symbol;Acc:17340]	ENSG00000174231	ENSP00000460348
SECISBP2L	SECIS binding protein 2-like [Source:HGNC Symbol;Acc:28997]	ENSG00000138593	ENSP00000370314
SECISBP2	SECIS binding protein 2 [Source:HGNC Symbol;Acc:30972]	ENSG00000187742	ENSP00000364959
RPUSD3	RNA pseudouridylate synthase domain containing 3 [Source:HGNC Symbol;Acc:28437]	ENSG00000156990	ENSP00000405054
RPUSD4	RNA pseudouridylate synthase domain containing 4 [Source:HGNC Symbol;Acc:25898]	ENSG00000165526	ENSP00000298317
DDX6	DEAD (Asp-Glu-Ala-Asp) box helicase 6 [Source:HGNC Symbol;Acc:2747]	ENSG00000269612	ENSP00000469200
RPL28	ribosomal protein L28 [Source:HGNC Symbol;Acc:10330]	ENSG00000108107	ENSP00000453584
ELAC1	elaC homolog 1 (E. coli) [Source:HGNC Symbol;Acc:14197]	ENSG00000141642	ENSP00000464770
NOM1	nucleolar protein with MIF4G domain 1 [Source:HGNC Symbol;Acc:13244]	ENSG00000146909	ENSP00000275820
TROVE2	TROVE domain family, member 2 [Source:HGNC Symbol;Acc:11313]	ENSG00000116747	ENSP00000472298
EEF1E1	eukaryotic translation elongation factor 1 epsilon 1 [Source:HGNC Symbol;Acc:3212]	ENSG00000124802	ENSP00000369038
TARSL2	threonyl-tRNA synthetase-like 2 [Source:HGNC Symbol;Acc:24728]	ENSG00000185418	ENSP00000338093
TARS	threonyl-tRNA synthetase [Source:HGNC Symbol;Acc:11572]	ENSG00000113407	ENSP00000387710
TARS2	threonyl-tRNA synthetase 2, mitochondrial (putative) [Source:HGNC Symbol;Acc:30740]	ENSG00000143374	ENSP00000358060
IARS	isoleucyl-tRNA synthetase [Source:HGNC Symbol;Acc:5330]	ENSG00000196305	ENSP00000406448
RPL18A	ribosomal protein L18a [Source:HGNC Symbol;Acc:10311]	ENSG00000105640	ENSP00000471584
ESF1	ESF1, nucleolar pre-rRNA processing protein, homolog (S. cerevisiae) [Source:HGNC Symbol;Acc:15898]	ENSG00000089048	ENSP00000202816
EEF2	eukaryotic translation elongation factor 2 [Source:HGNC Symbol;Acc:3214]	ENSG00000167658	ENSP00000307940
EFTUD2	elongation factor Tu GTP binding domain containing 2 [Source:HGNC Symbol;Acc:30858]	ENSG00000108883	ENSP00000465058
DDX60	DEAD (Asp-Glu-Ala-Asp) box polypeptide 60 [Source:HGNC Symbol;Acc:25942]	ENSG00000137628	ENSP00000377344
DDX60L	DEAD (Asp-Glu-Ala-Asp) box polypeptide 60-like [Source:HGNC Symbol;Acc:26429]	ENSG00000181381	ENSP00000422423
MRPL2	mitochondrial ribosomal protein L2 [Source:HGNC Symbol;Acc:14056]	ENSG00000112651	ENSP00000230413
SLC4A1AP	solute carrier family 4 (anion exchanger), member 1, adaptor protein [Source:HGNC Symbol;Acc:13813]	ENSG00000163798	ENSP00000323837
MAZ	MYC-associated zinc finger protein (purine-binding transcription factor) [Source:HGNC Symbol;Acc:6914]	ENSG00000103495	ENSP00000443956
EIF2S3L	Putative eukaryotic translation initiation factor 2 subunit 3-like protein [Source:UniProtKB/Swiss-Prot;Acc:Q2VIR3]	ENSG00000180574	ENSP00000445077
EIF2S3	eukaryotic translation initiation factor 2, subunit 3 gamma, 52kDa [Source:HGNC Symbol;Acc:3267]	ENSG00000130741	ENSP00000253039
AIMP1	aminoacyl tRNA synthetase complex-interacting multifunctional protein 1 [Source:HGNC Symbol;Acc:10648]	ENSG00000164022	ENSP00000350699
APEX1	APEX nuclease (multifunctional DNA repair enzyme) 1 [Source:HGNC Symbol;Acc:587]	ENSG00000100823	ENSP00000452137
EIF3J	eukaryotic translation initiation factor 3, subunit J [Source:HGNC Symbol;Acc:3270]	ENSG00000104131	ENSP00000443563
PABPC3	poly(A) binding protein, cytoplasmic 3 [Source:HGNC Symbol;Acc:8556]	ENSG00000151846	ENSP00000281589
PABPC1L	poly(A) binding protein, cytoplasmic 1-like [Source:HGNC Symbol;Acc:15797]	ENSG00000101104	ENSP00000217073
PABPC1L2A	poly(A) binding protein, cytoplasmic 1-like 2A [Source:HGNC Symbol;Acc:27989]	ENSG00000268574	ENSP00000471407
PABPC1L2B	poly(A) binding protein, cytoplasmic 1-like 2B [Source:HGNC Symbol;Acc:31852]	ENSG00000267891	ENSP00000470071
PABPC4L	poly(A) binding protein, cytoplasmic 4-like [Source:HGNC Symbol;Acc:31955]	ENSG00000254535	ENSP00000462986
PABPC5	poly(A) binding protein, cytoplasmic 5 [Source:HGNC Symbol;Acc:13629]	ENSG00000174740	ENSP00000308012
PABPC4	poly(A) binding protein, cytoplasmic 4 (inducible form) [Source:HGNC Symbol;Acc:8557]	ENSG00000090621	ENSP00000361949
PABPC1	poly(A) binding protein, cytoplasmic 1 [Source:HGNC Symbol;Acc:8554]	ENSG00000070756	ENSP00000429395
MEX3A	mex-3 homolog A (C. elegans) [Source:HGNC Symbol;Acc:33482]	ENSG00000254726	ENSP00000432845
MEX3B	mex-3 homolog B (C. elegans) [Source:HGNC Symbol;Acc:25297]	ENSG00000183496	ENSP00000329918
MEX3C	mex-3 homolog C (C. elegans) [Source:HGNC Symbol;Acc:28040]	ENSG00000176624	ENSP00000385610
MEX3D	mex-3 homolog D (C. elegans) [Source:HGNC Symbol;Acc:16734]	ENSG00000181588	ENSP00000384398
GEMIN7	gem (nuclear organelle) associated protein 7 [Source:HGNC Symbol;Acc:20045]	ENSG00000142252	ENSP00000466342
MRPS23	mitochondrial ribosomal protein S23 [Source:HGNC Symbol;Acc:14509]	ENSG00000181610	ENSP00000320184
PSIP1	PC4 and SFRS1 interacting protein 1 [Source:HGNC Symbol;Acc:9527]	ENSG00000164985	ENSP00000370109
SRP54	signal recognition particle 54kDa [Source:HGNC Symbol;Acc:11301]	ENSG00000100883	ENSP00000216774
FARSB	phenylalanyl-tRNA synthetase, beta subunit [Source:HGNC Symbol;Acc:17800]	ENSG00000116120	ENSP00000281828
SPEN	spen homolog, transcriptional regulator (Drosophila) [Source:HGNC Symbol;Acc:17575]	ENSG00000065526	ENSP00000364912
RBM15B	RNA binding motif protein 15B [Source:HGNC Symbol;Acc:24303]	ENSG00000179837	ENSP00000313890
RBM15	RNA binding motif protein 15 [Source:HGNC Symbol;Acc:14959]	ENSG00000162775	ENSP00000473638
DNAAF2	dynein, axonemal, assembly factor 2 [Source:HGNC Symbol;Acc:20188]	ENSG00000165506	ENSP00000384862
SF3B1	splicing factor 3b, subunit 1, 155kDa [Source:HGNC Symbol;Acc:10768]	ENSG00000115524	ENSP00000335321
RNASEH2B	ribonuclease H2, subunit B [Source:HGNC Symbol;Acc:25671]	ENSG00000136104	ENSP00000337623
FARSA	phenylalanyl-tRNA synthetase, alpha subunit [Source:HGNC Symbol;Acc:3592]	ENSG00000179115	ENSP00000467384
NOB1	NIN1/RPN12 binding protein 1 homolog (S. cerevisiae) [Source:HGNC Symbol;Acc:29540]	ENSG00000141101	ENSP00000268802
EIF2A	eukaryotic translation initiation factor 2A, 65kDa [Source:HGNC Symbol;Acc:3254]	ENSG00000144895	ENSP00000385292
RNASEL	ribonuclease L (2',5'-oligoisoadenylate synthetase-dependent) [Source:HGNC Symbol;Acc:10050]	ENSG00000135828	ENSP00000356530
TRNT1	tRNA nucleotidyl transferase, CCA-adding, 1 [Source:HGNC Symbol;Acc:17341]	ENSG00000072756	ENSP00000251607
EIF4ENIF1	eukaryotic translation initiation factor 4E nuclear import factor 1 [Source:HGNC Symbol;Acc:16687]	ENSG00000184708	ENSP00000328103
MECP2	methyl CpG binding protein 2 (Rett syndrome) [Source:HGNC Symbol;Acc:6990]	ENSG00000169057	ENSP00000301948
RBM22	RNA binding motif protein 22 [Source:HGNC Symbol;Acc:25503]	ENSG00000086589	ENSP00000199814
CMTR1	cap methyltransferase 1 [Source:HGNC Symbol;Acc:21077]	ENSG00000137200	ENSP00000414233
RPL39	ribosomal protein L39 [Source:HGNC Symbol;Acc:10350]	ENSG00000198918	ENSP00000355315
RPL39L	ribosomal protein L39-like [Source:HGNC Symbol;Acc:17094]	ENSG00000163923	ENSP00000389356
RPSA	ribosomal protein SA [Source:HGNC Symbol;Acc:6502]	ENSG00000168028	ENSP00000410848
PARP4	poly (ADP-ribose) polymerase family, member 4 [Source:HGNC Symbol;Acc:271]	ENSG00000102699	ENSP00000371419
CSTF1	cleavage stimulation factor, 3' pre-RNA, subunit 1, 50kDa [Source:HGNC Symbol;Acc:2483]	ENSG00000101138	ENSP00000217109
NCBP1	nuclear cap binding protein subunit 1, 80kDa [Source:HGNC Symbol;Acc:7658]	ENSG00000136937	ENSP00000364289
SNRNP25	small nuclear ribonucleoprotein 25kDa (U11/U12) [Source:HGNC Symbol;Acc:14161]	ENSG00000161981	ENSP00000372482
DNAJC21	DnaJ (Hsp40) homolog, subfamily C, member 21 [Source:HGNC Symbol;Acc:27030]	ENSG00000168724	ENSP00000306289
CWC22	CWC22 spliceosome-associated protein homolog (S. cerevisiae) [Source:HGNC Symbol;Acc:29322]	ENSG00000163510	ENSP00000295749
NFX1	nuclear transcription factor, X-box binding 1 [Source:HGNC Symbol;Acc:7803]	ENSG00000086102	ENSP00000368856
MRPS31	mitochondrial ribosomal protein S31 [Source:HGNC Symbol;Acc:16632]	ENSG00000102738	ENSP00000315397
SMG5	smg-5 homolog, nonsense mediated mRNA decay factor (C. elegans) [Source:HGNC Symbol;Acc:24644]	ENSG00000198952	ENSP00000355261
SART1	squamous cell carcinoma antigen recognized by T cells [Source:HGNC Symbol;Acc:10538]	ENSG00000175467	ENSP00000310448
GEMIN2	gem (nuclear organelle) associated protein 2 [Source:HGNC Symbol;Acc:10884]	ENSG00000092208	ENSP00000308533
NR0B1	nuclear receptor subfamily 0, group B, member 1 [Source:HGNC Symbol;Acc:7960]	ENSG00000169297	ENSP00000368253
DCP2	DCP2 decapping enzyme homolog (S. cerevisiae) [Source:HGNC Symbol;Acc:24452]	ENSG00000172795	ENSP00000425770
TAF15	TAF15 RNA polymerase II, TATA box binding protein (TBP)-associated factor, 68kDa [Source:HGNC Symbol;Acc:11547]	ENSG00000172660	ENSP00000466950
EWSR1	Ewing sarcoma breakpoint region 1 [Source:HGNC Symbol;Acc:3508]	ENSG00000182944	ENSP00000330516
FUS	fused in sarcoma [Source:HGNC Symbol;Acc:4010]	ENSG00000089280	ENSP00000455282
EDC4	enhancer of mRNA decapping 4 [Source:HGNC Symbol;Acc:17157]	ENSG00000038358	ENSP00000351811
FBLL1	fibrillarin-like 1 [Source:HGNC Symbol;Acc:35458]	ENSG00000188573	ENSP00000473383
FBL	fibrillarin [Source:HGNC Symbol;Acc:3599]	ENSG00000105202	ENSP00000471867
MRPS27	mitochondrial ribosomal protein S27 [Source:HGNC Symbol;Acc:14512]	ENSG00000113048	ENSP00000428120
ALKBH1	alkB, alkylation repair homolog 1 (E. coli) [Source:HGNC Symbol;Acc:17911]	ENSG00000100601	ENSP00000216489
ZCCHC17	zinc finger, CCHC domain containing 17 [Source:HGNC Symbol;Acc:30246]	ENSG00000121766	ENSP00000444742
MRPL49	mitochondrial ribosomal protein L49 [Source:HGNC Symbol;Acc:1176]	ENSG00000149792	ENSP00000279242
RPL18	ribosomal protein L18 [Source:HGNC Symbol;Acc:10310]	ENSG00000063177	ENSP00000447001
RPS4X	ribosomal protein S4, X-linked [Source:HGNC Symbol;Acc:10424]	ENSG00000198034	ENSP00000362744
RPS4Y1	ribosomal protein S4, Y-linked 1 [Source:HGNC Symbol;Acc:10425]	ENSG00000129824	ENSP00000250784
RPS4Y2	ribosomal protein S4, Y-linked 2 [Source:HGNC Symbol;Acc:18501]	ENSG00000157828	ENSP00000288666
NOP14	NOP14 nucleolar protein [Source:HGNC Symbol;Acc:16821]	ENSG00000087269	ENSP00000405068
KRR1	KRR1, small subunit (SSU) processome component, homolog (yeast) [Source:HGNC Symbol;Acc:5176]	ENSG00000111615	ENSP00000411740
NCL	nucleolin [Source:HGNC Symbol;Acc:7667]	ENSG00000115053	ENSP00000318195
PRPF18	PRP18 pre-mRNA processing factor 18 homolog (S. cerevisiae) [Source:HGNC Symbol;Acc:17351]	ENSG00000165630	ENSP00000367835
C1D	C1D nuclear receptor corepressor [Source:HGNC Symbol;Acc:29911]	ENSG00000197223	ENSP00000386468
ADAT3	adenosine deaminase, tRNA-specific 3 [Source:HGNC Symbol;Acc:25151]	ENSG00000213638	ENSP00000473571
UTP20	UTP20, small subunit (SSU) processome component, homolog (yeast) [Source:HGNC Symbol;Acc:17897]	ENSG00000120800	ENSP00000261637
SNIP1	Smad nuclear interacting protein 1 [Source:HGNC Symbol;Acc:30587]	ENSG00000163877	ENSP00000296215
GUF1	GUF1 GTPase homolog (S. cerevisiae) [Source:HGNC Symbol;Acc:25799]	ENSG00000151806	ENSP00000281543
GCFC2	GC-rich sequence DNA-binding factor 2 [Source:HGNC Symbol;Acc:1317]	ENSG00000005436	ENSP00000318690
UTP6	UTP6, small subunit (SSU) processome component, homolog (yeast) [Source:HGNC Symbol;Acc:18279]	ENSG00000108651	ENSP00000261708
SRSF1	serine/arginine-rich splicing factor 1 [Source:HGNC Symbol;Acc:10780]	ENSG00000136450	ENSP00000258962
SRSF3	serine/arginine-rich splicing factor 3 [Source:HGNC Symbol;Acc:10785]	ENSG00000112081	ENSP00000344762
SRSF4	serine/arginine-rich splicing factor 4 [Source:HGNC Symbol;Acc:10786]	ENSG00000116350	ENSP00000362900
SRSF5	serine/arginine-rich splicing factor 5 [Source:HGNC Symbol;Acc:10787]	ENSG00000100650	ENSP00000451391
SRSF6	serine/arginine-rich splicing factor 6 [Source:HGNC Symbol;Acc:10788]	ENSG00000124193	ENSP00000244020
SRSF7	serine/arginine-rich splicing factor 7 [Source:HGNC Symbol;Acc:10789]	ENSG00000115875	ENSP00000386806
SRSF9	serine/arginine-rich splicing factor 9 [Source:HGNC Symbol;Acc:10791]	ENSG00000111786	ENSP00000229390
USB1	U6 snRNA biogenesis 1 [Source:HGNC Symbol;Acc:25792]	ENSG00000103005	ENSP00000457322
NOL6	nucleolar protein family 6 (RNA-associated) [Source:HGNC Symbol;Acc:19910]	ENSG00000165271	ENSP00000368783
PPIE	peptidylprolyl isomerase E (cyclophilin E) [Source:HGNC Symbol;Acc:9258]	ENSG00000084072	ENSP00000361918
RRBP1	ribosome binding protein 1 homolog 180kDa (dog) [Source:HGNC Symbol;Acc:10448]	ENSG00000125844	ENSP00000367038
SUZ12	SUZ12 polycomb repressive complex 2 subunit [Source:HGNC Symbol;Acc:17101]	ENSG00000178691	ENSP00000316578
TERT	telomerase reverse transcriptase [Source:HGNC Symbol;Acc:11730]	ENSG00000164362	ENSP00000309572
MSL3	male-specific lethal 3 homolog (Drosophila) [Source:HGNC Symbol;Acc:7370]	ENSG00000005302	ENSP00000312244
BICC1	bicaudal C homolog 1 (Drosophila) [Source:HGNC Symbol;Acc:19351]	ENSG00000122870	ENSP00000362993
MRPS16	mitochondrial ribosomal protein S16 [Source:HGNC Symbol;Acc:14048]	ENSG00000182180	ENSP00000362031
RBMX2	RNA binding motif protein, X-linked 2 [Source:HGNC Symbol;Acc:24282]	ENSG00000134597	ENSP00000339090
MRPL40	mitochondrial ribosomal protein L40 [Source:HGNC Symbol;Acc:14491]	ENSG00000185608	ENSP00000333401
ISG20	interferon stimulated exonuclease gene 20kDa [Source:HGNC Symbol;Acc:6130]	ENSG00000172183	ENSP00000306565
ISG20L2	interferon stimulated exonuclease gene 20kDa-like 2 [Source:HGNC Symbol;Acc:25745]	ENSG00000143319	ENSP00000323424
AEN	apoptosis enhancing nuclease [Source:HGNC Symbol;Acc:25722]	ENSG00000181026	ENSP00000453631
REXO4	REX4, RNA exonuclease 4 homolog (S. cerevisiae) [Source:HGNC Symbol;Acc:12820]	ENSG00000148300	ENSP00000361010
TGS1	trimethylguanosine synthase 1 [Source:HGNC Symbol;Acc:17843]	ENSG00000137574	ENSP00000260129
ZC3H4	zinc finger CCCH-type containing 4 [Source:HGNC Symbol;Acc:17808]	ENSG00000130749	ENSP00000469684
ZC3H6	zinc finger CCCH-type containing 6 [Source:HGNC Symbol;Acc:24762]	ENSG00000188177	ENSP00000386764
ZC3H8	zinc finger CCCH-type containing 8 [Source:HGNC Symbol;Acc:30941]	ENSG00000144161	ENSP00000386488
RPL27A	ribosomal protein L27a [Source:HGNC Symbol;Acc:10329]	ENSG00000166441	ENSP00000431565
RPS19	ribosomal protein S19 [Source:HGNC Symbol;Acc:10402]	ENSG00000105372	ENSP00000470972
SYF2	SYF2 homolog, RNA splicing factor (S. cerevisiae) [Source:HGNC Symbol;Acc:19824]	ENSG00000117614	ENSP00000236273
TFB1M	transcription factor B1, mitochondrial [Source:HGNC Symbol;Acc:17037]	ENSG00000029639	ENSP00000356134
DIMT1	DIM1 dimethyladenosine transferase 1 homolog (S. cerevisiae) [Source:HGNC Symbol;Acc:30217]	ENSG00000086189	ENSP00000199320
TSEN34	tRNA splicing endonuclease 34 homolog (S. cerevisiae) [Source:HGNC Symbol;Acc:15506]	ENSG00000170892	ENSP00000379667
DCAF13	DDB1 and CUL4 associated factor 13 [Source:HGNC Symbol;Acc:24535]	ENSG00000164934	ENSP00000297579
RPL9	ribosomal protein L9 [Source:HGNC Symbol;Acc:10369]	ENSG00000163682	ENSP00000400467
ARHGEF28	Rho guanine nucleotide exchange factor (GEF) 28 [Source:HGNC Symbol;Acc:30322] [Type: protein coding Ensembl/Havana merge]	ENSG00000214944	ENSP00000441913
AC004381.6	Putative RNA exonuclease NEF-sp [Source:UniProtKB/Swiss-Prot;Acc:Q96IC2]	ENSG00000005189	ENSP00000261377
EIF4H	eukaryotic translation initiation factor 4H [Source:HGNC Symbol;Acc:12741]	ENSG00000263344	ENSP00000458302
EIF4B	eukaryotic translation initiation factor 4B [Source:HGNC Symbol;Acc:3285]	ENSG00000063046	ENSP00000450324
DDX54	DEAD (Asp-Glu-Ala-Asp) box polypeptide 54 [Source:HGNC Symbol;Acc:20084]	ENSG00000123064	ENSP00000323858
MRPS36	mitochondrial ribosomal protein S36 [Source:HGNC Symbol;Acc:16631]	ENSG00000134056	ENSP00000256441
PRPF40A	PRP40 pre-mRNA processing factor 40 homolog A (S. cerevisiae) [Source:HGNC Symbol;Acc:16463]	ENSG00000196504	ENSP00000386458
PRPF40B	PRP40 pre-mRNA processing factor 40 homolog B (S. cerevisiae) [Source:HGNC Symbol;Acc:25031]	ENSG00000110844	ENSP00000448073
EIF3L	eukaryotic translation initiation factor 3 subunit L isoform 2 [Source:RefSeq peptide;Acc:NP_001229852]	ENSG00000100129	ENSP00000416892
NOL8	nucleolar protein 8 [Source:HGNC Symbol;Acc:23387]	ENSG00000198000	ENSP00000401177
MTO1	mitochondrial translation optimization 1 homolog (S. cerevisiae) [Source:HGNC Symbol;Acc:19261]	ENSG00000135297	ENSP00000359323
PSMA1	proteasome (prosome, macropain) subunit, alpha type, 1 [Source:HGNC Symbol;Acc:9530]	ENSG00000129084	ENSP00000414359
HTATSF1	HIV-1 Tat specific factor 1 [Source:HGNC Symbol;Acc:5276]	ENSG00000102241	ENSP00000218364
FTSJ1	FtsJ RNA methyltransferase homolog 1 (E. coli) [Source:HGNC Symbol;Acc:13254]	ENSG00000269875	ENSP00000471096
LAS1L	LAS1-like (S. cerevisiae) [Source:HGNC Symbol;Acc:25726]	ENSG00000001497	ENSP00000308649
POP1	processing of precursor 1, ribonuclease P/MRP subunit (S. cerevisiae) [Source:HGNC Symbol;Acc:30129]	ENSG00000104356	ENSP00000385787
DZIP3	DAZ interacting protein 3, zinc finger [Source:HGNC Symbol;Acc:30938]	ENSG00000198919	ENSP00000355028
DGCR14	DiGeorge syndrome critical region gene 14 [Source:HGNC Symbol;Acc:16817]	ENSG00000100056	ENSP00000252137
CDK9	cyclin-dependent kinase 9 [Source:HGNC Symbol;Acc:1780]	ENSG00000136807	ENSP00000362361
PAN3	PAN3 poly(A) specific ribonuclease subunit homolog (S. cerevisiae) [Source:HGNC Symbol;Acc:29991]	ENSG00000152520	ENSP00000370345
RPL29	ribosomal protein L29 [Source:HGNC Symbol;Acc:10331]	ENSG00000162244	ENSP00000420673
DCPS	decapping enzyme, scavenger [Source:HGNC Symbol;Acc:29812]	ENSG00000110063	ENSP00000263579
MRP63	mitochondrial ribosomal protein 63 [Source:HGNC Symbol;Acc:14514]	ENSG00000173141	ENSP00000310726
MRPL27	mitochondrial ribosomal protein L27 [Source:HGNC Symbol;Acc:14483]	ENSG00000108826	ENSP00000388915
POLR2H	polymerase (RNA) II (DNA directed) polypeptide H [Source:HGNC Symbol;Acc:9195]	ENSG00000163882	ENSP00000392913
ZNF239	zinc finger protein 239 [Source:HGNC Symbol;Acc:13031]	ENSG00000196793	ENSP00000307774
XRN1	5'-3' exoribonuclease 1 [Source:HGNC Symbol;Acc:30654]	ENSG00000114127	ENSP00000418404
ZFR	zinc finger RNA binding protein [Source:HGNC Symbol;Acc:17277]	ENSG00000056097	ENSP00000265069
ZFR2	zinc finger RNA binding protein 2 [Source:HGNC Symbol;Acc:29189]	ENSG00000105278	ENSP00000262961
AGFG1	ArfGAP with FG repeats 1 [Source:HGNC Symbol;Acc:5175]	ENSG00000173744	ENSP00000312059
NSA2	NSA2 ribosome biogenesis homolog (S. cerevisiae) [Source:HGNC Symbol;Acc:30728]	ENSG00000164346	ENSP00000296802
DDX10	DEAD (Asp-Glu-Ala-Asp) box polypeptide 10 [Source:HGNC Symbol;Acc:2735]	ENSG00000178105	ENSP00000432032
TBL3	transducin (beta)-like 3 [Source:HGNC Symbol;Acc:11587]	ENSG00000183751	ENSP00000454836
INTS2	integrator complex subunit 2 [Source:HGNC Symbol;Acc:29241]	ENSG00000108506	ENSP00000414237
YBX1	Y box binding protein 1 [Source:HGNC Symbol;Acc:8014]	ENSG00000065978	ENSP00000361626
YBX2	Y box binding protein 2 [Source:HGNC Symbol;Acc:17948]	ENSG00000006047	ENSP00000007699
YBX3	cold shock domain protein A [Source:HGNC Symbol;Acc:2428]	ENSG00000060138	ENSP00000228251
SURF6	surfeit 6 [Source:HGNC Symbol;Acc:11478]	ENSG00000261306	ENSP00000457813
THOC6	THO complex 6 homolog (Drosophila) [Source:HGNC Symbol;Acc:28369]	ENSG00000131652	ENSP00000326531
EIF3I	eukaryotic translation initiation factor 3, subunit I [Source:HGNC Symbol;Acc:3272]	ENSG00000084623	ENSP00000362688
STRAP	serine/threonine kinase receptor associated protein [Source:HGNC Symbol;Acc:30796]	ENSG00000023734	ENSP00000392270
RPL13	ribosomal protein L13 [Source:HGNC Symbol;Acc:10303]	ENSG00000167526	ENSP00000457686
RRP12	ribosomal RNA processing 12 homolog (S. cerevisiae) [Source:HGNC Symbol;Acc:29100]	ENSG00000052749	ENSP00000446184
MRPS2	mitochondrial ribosomal protein S2 [Source:HGNC Symbol;Acc:14495]	ENSG00000122140	ENSP00000360850
ZCCHC8	zinc finger, CCHC domain containing 8 [Source:HGNC Symbol;Acc:25265]	ENSG00000033030	ENSP00000337313
EFTUD1	elongation factor Tu GTP binding domain containing 1 [Source:HGNC Symbol;Acc:25789]	ENSG00000140598	ENSP00000352418
RPL35	ribosomal protein L35 [Source:HGNC Symbol;Acc:10344]	ENSG00000136942	ENSP00000259469
NSRP1	nuclear speckle splicing regulatory protein 1 [Source:HGNC Symbol;Acc:25305]	ENSG00000126653	ENSP00000465442
RPUSD2	RNA pseudouridylate synthase domain containing 2 [Source:HGNC Symbol;Acc:24180]	ENSG00000166133	ENSP00000453036
BCDIN3D	BCDIN3 domain containing [Source:HGNC Symbol;Acc:27050]	ENSG00000186666	ENSP00000335201
THUMPD1	THUMP domain containing 1 [Source:HGNC Symbol;Acc:23807]	ENSG00000066654	ENSP00000392282
TRIM21	tripartite motif containing 21 [Source:HGNC Symbol;Acc:11312] [Type: protein coding Ensembl/Havana merge]	ENSG00000132109	ENSP00000254436
RANBP17	RAN binding protein 17 [Source:HGNC Symbol;Acc:14428]	ENSG00000204764	ENSP00000427975
XPO7	exportin 7 [Source:HGNC Symbol;Acc:14108]	ENSG00000130227	ENSP00000410249
TRMT12	tRNA methyltransferase 12 homolog (S. cerevisiae) [Source:HGNC Symbol;Acc:26091]	ENSG00000183665	ENSP00000329858
ACIN1	apoptotic chromatin condensation inducer 1 [Source:HGNC Symbol;Acc:17066]	ENSG00000100813	ENSP00000262710
ZNF385A	zinc finger protein 385A [Source:HGNC Symbol;Acc:17521]	ENSG00000161642	ENSP00000448567
RPL23	ribosomal protein L23 [Source:HGNC Symbol;Acc:10316]	ENSG00000125691	ENSP00000463894
EED	embryonic ectoderm development [Source:HGNC Symbol;Acc:3188]	ENSG00000074266	ENSP00000263360
DNTTIP2	deoxynucleotidyltransferase, terminal, interacting protein 2 [Source:HGNC Symbol;Acc:24013]	ENSG00000067334	ENSP00000411010
SBDS	Shwachman-Bodian-Diamond syndrome [Source:HGNC Symbol;Acc:19440]	ENSG00000126524	ENSP00000246868
DDX51	DEAD (Asp-Glu-Ala-Asp) box polypeptide 51 [Source:HGNC Symbol;Acc:20082]	ENSG00000185163	ENSP00000380495
RBM18	RNA binding motif protein 18 [Source:HGNC Symbol;Acc:28413]	ENSG00000119446	ENSP00000409315
IPO11	importin 11 [Source:HGNC Symbol;Acc:20628]	ENSG00000086200	ENSP00000427274
RPL22	ribosomal protein L22 [Source:HGNC Symbol;Acc:10315]	ENSG00000116251	ENSP00000466013
RPL22L1	ribosomal protein L22-like 1 [Source:HGNC Symbol;Acc:27610]	ENSG00000163584	ENSP00000419041
LCMT2	leucine carboxyl methyltransferase 2 [Source:HGNC Symbol;Acc:17558]	ENSG00000168806	ENSP00000307214
ZC3H11A	zinc finger CCCH-type containing 11A [Source:HGNC Symbol;Acc:29093]	ENSG00000058673	ENSP00000406531
FYTTD1	forty-two-three domain containing 1 [Source:HGNC Symbol;Acc:25407]	ENSG00000122068	ENSP00000241502
RNPS1	RNA binding protein S1, serine-rich domain [Source:HGNC Symbol;Acc:10080]	ENSG00000205937	ENSP00000455306
RPS23	ribosomal protein S23 [Source:HGNC Symbol;Acc:10410]	ENSG00000186468	ENSP00000296674
RNASEH2A	ribonuclease H2, subunit A [Source:HGNC Symbol;Acc:18518]	ENSG00000104889	ENSP00000221486
FRG1B	FSHD region gene 1 family, member B [Source:HGNC Symbol;Acc:15792]	ENSG00000149531	ENSP00000351249
FRG1	FSHD region gene 1 [Source:HGNC Symbol;Acc:3954]	ENSG00000260380	ENSP00000455022
NOL7	nucleolar protein 7, 27kDa [Source:HGNC Symbol;Acc:21040]	ENSG00000225921	ENSP00000405674
PRPF38A	PRP38 pre-mRNA processing factor 38 (yeast) domain containing A [Source:HGNC Symbol;Acc:25930]	ENSG00000134748	ENSP00000257181
RBM41	RNA binding motif protein 41 [Source:HGNC Symbol;Acc:25617]	ENSG00000089682	ENSP00000361557
RBM12	RNA binding motif protein 12 [Source:HGNC Symbol;Acc:9898]	ENSG00000244462	ENSP00000352668
RBM12B	RNA binding motif protein 12B [Source:HGNC Symbol;Acc:32310]	ENSG00000183808	ENSP00000427729
ESRP1	epithelial splicing regulatory protein 1 [Source:HGNC Symbol;Acc:25966]	ENSG00000104413	ENSP00000430118
ESRP2	epithelial splicing regulatory protein 2 [Source:HGNC Symbol;Acc:26152]	ENSG00000103067	ENSP00000454554
HNRNPF	heterogeneous nuclear ribonucleoprotein F [Source:HGNC Symbol;Acc:5039]	ENSG00000169813	ENSP00000400433
HNRNPH1	heterogeneous nuclear ribonucleoprotein H1 (H) [Source:HGNC Symbol;Acc:5041]	ENSG00000169045	ENSP00000377082
HNRNPH2	heterogeneous nuclear ribonucleoprotein H2 (H') [Source:HGNC Symbol;Acc:5042]	ENSG00000126945	ENSP00000361927
HNRNPH3	heterogeneous nuclear ribonucleoprotein H3 (2H9) [Source:HGNC Symbol;Acc:5043]	ENSG00000096746	ENSP00000265866
GRSF1	G-rich RNA sequence binding factor 1 [Source:HGNC Symbol;Acc:4610]	ENSG00000132463	ENSP00000254799
RNH1	ribonuclease/angiogenin inhibitor 1 [Source:HGNC Symbol;Acc:10074]	ENSG00000023191	ENSP00000433999
NOL9	nucleolar protein 9 [Source:HGNC Symbol;Acc:26265]	ENSG00000162408	ENSP00000366934
SRFBP1	serum response factor binding protein 1 [Source:HGNC Symbol;Acc:26333]	ENSG00000151304	ENSP00000341324
ARL6IP4	ADP-ribosylation-like factor 6 interacting protein 4 [Source:HGNC Symbol;Acc:18076]	ENSG00000182196	ENSP00000376230
RPP40	ribonuclease P/MRP 40kDa subunit [Source:HGNC Symbol;Acc:20992]	ENSG00000124787	ENSP00000317998
ALKBH5	alkB, alkylation repair homolog 5 (E. coli) [Source:HGNC Symbol;Acc:25996]	ENSG00000091542	ENSP00000382091
SMG7	smg-7 homolog, nonsense mediated mRNA decay factor (C. elegans) [Source:HGNC Symbol;Acc:16792]	ENSG00000116698	ENSP00000425133
PDE12	phosphodiesterase 12 [Source:HGNC Symbol;Acc:25386]	ENSG00000174840	ENSP00000309142
CCRN4L	CCR4 carbon catabolite repression 4-like (S. cerevisiae) [Source:HGNC Symbol;Acc:14254]	ENSG00000151014	ENSP00000280614
ANGEL1	angel homolog 1 (Drosophila) [Source:HGNC Symbol;Acc:19961]	ENSG00000013523	ENSP00000451534
ANGEL2	angel homolog 2 (Drosophila) [Source:HGNC Symbol;Acc:30534]	ENSG00000174606	ENSP00000438141
CNOT6	CCR4-NOT transcription complex, subunit 6 [Source:HGNC Symbol;Acc:14099]	ENSG00000113300	ENSP00000261951
CNOT6L	CCR4-NOT transcription complex, subunit 6-like [Source:HGNC Symbol;Acc:18042]	ENSG00000138767	ENSP00000423750
PDCD11	programmed cell death 11 [Source:HGNC Symbol;Acc:13408]	ENSG00000148843	ENSP00000358812
RPL35A	ribosomal protein L35a [Source:HGNC Symbol;Acc:10345]	ENSG00000182899	ENSP00000419117
MRPL21	mitochondrial ribosomal protein L21 [Source:HGNC Symbol;Acc:14479]	ENSG00000197345	ENSP00000389400
SMG6	smg-6 homolog, nonsense mediated mRNA decay factor (C. elegans) [Source:HGNC Symbol;Acc:17809]	ENSG00000070366	ENSP00000263073
PRPF19	PRP19/PSO4 pre-mRNA processing factor 19 homolog (S. cerevisiae) [Source:HGNC Symbol;Acc:17896]	ENSG00000110107	ENSP00000227524
PRPF4	PRP4 pre-mRNA processing factor 4 homolog (yeast) [Source:HGNC Symbol;Acc:17349]	ENSG00000136875	ENSP00000363313
INTS4	integrator complex subunit 4 [Source:HGNC Symbol;Acc:25048]	ENSG00000149262	ENSP00000434466
SRPK2	SRSF protein kinase 2 [Source:HGNC Symbol;Acc:11306]	ENSG00000135250	ENSP00000349863
SUPV3L1	suppressor of var1, 3-like 1 (S. cerevisiae) [Source:HGNC Symbol;Acc:11471]	ENSG00000156502	ENSP00000352678
RBM17	RNA binding motif protein 17 [Source:HGNC Symbol;Acc:16944]	ENSG00000134453	ENSP00000369218
NAF1	nuclear assembly factor 1 homolog (S. cerevisiae) [Source:HGNC Symbol;Acc:25126]	ENSG00000145414	ENSP00000274054
YARS	tyrosyl-tRNA synthetase [Source:HGNC Symbol;Acc:12840]	ENSG00000134684	ENSP00000362576
LRRFIP1	leucine rich repeat (in FLII) interacting protein 1 [Source:HGNC Symbol;Acc:6702]	ENSG00000124831	ENSP00000310109
LRRFIP2	leucine rich repeat (in FLII) interacting protein 2 [Source:HGNC Symbol;Acc:6703]	ENSG00000093167	ENSP00000392217
EIF4E2	eukaryotic translation initiation factor 4E family member 2 [Source:HGNC Symbol;Acc:3293]	ENSG00000135930	ENSP00000258416
EIF4E1B	eukaryotic translation initiation factor 4E family member 1B [Source:HGNC Symbol;Acc:33179]	ENSG00000175766	ENSP00000422420
EIF4E3	eukaryotic translation initiation factor 4E family member 3 [Source:HGNC Symbol;Acc:31837]	ENSG00000163412	ENSP00000374476
EIF4E	eukaryotic translation initiation factor 4E [Source:HGNC Symbol;Acc:3287]	ENSG00000151247	ENSP00000425561
BUD13	BUD13 homolog (S. cerevisiae) [Source:HGNC Symbol;Acc:28199]	ENSG00000137656	ENSP00000260210
CTU1	cytosolic thiouridylase subunit 1 homolog (S. pombe) [Source:HGNC Symbol;Acc:29590]	ENSG00000142544	ENSP00000390011
GTPBP1	GTP binding protein 1 [Source:HGNC Symbol;Acc:4669]	ENSG00000100226	ENSP00000216044
GTPBP2	GTP binding protein 2 [Source:HGNC Symbol;Acc:4670]	ENSG00000172432	ENSP00000304893
MTERFD2	MTERF domain containing 2 [Source:HGNC Symbol;Acc:28785]	ENSG00000122085	ENSP00000375840
SRPR	signal recognition particle receptor (docking protein) [Source:HGNC Symbol;Acc:11307]	ENSG00000182934	ENSP00000435508
DDX50	DEAD (Asp-Glu-Ala-Asp) box polypeptide 50 [Source:HGNC Symbol;Acc:17906]	ENSG00000107625	ENSP00000362687
DDX21	DEAD (Asp-Glu-Ala-Asp) box helicase 21 [Source:HGNC Symbol;Acc:2744]	ENSG00000165732	ENSP00000346120
ZCRB1	zinc finger CCHC-type and RNA binding motif 1 [Source:HGNC Symbol;Acc:29620]	ENSG00000139168	ENSP00000266529
RPL13A	ribosomal protein L13a [Source:HGNC Symbol;Acc:10304]	ENSG00000142541	ENSP00000375730
SRA1	steroid receptor RNA activator 1 [Source:HGNC Symbol;Acc:11281]	ENSG00000213523	ENSP00000473378
PAPOLB	poly(A) polymerase beta (testis specific) [Source:HGNC Symbol;Acc:15970]	ENSG00000218823	ENSP00000384700
PAPOLG	poly(A) polymerase gamma [Source:HGNC Symbol;Acc:14982]	ENSG00000115421	ENSP00000238714
PAPOLA	poly(A) polymerase alpha [Source:HGNC Symbol;Acc:14981]	ENSG00000090060	ENSP00000450534
RPL41	ribosomal protein L41 [Source:HGNC Symbol;Acc:10354]	ENSG00000229117	ENSP00000420821
ZNF768	zinc finger protein 768 [Source:HGNC Symbol;Acc:26273]	ENSG00000169957	ENSP00000369777
SCAF1	SR-related CTD-associated factor 1 [Source:HGNC Symbol;Acc:30403] [Type: protein coding Ensembl/Havana merge]	ENSG00000126461	ENSP00000353769
MRPS15	mitochondrial ribosomal protein S15 [Source:HGNC Symbol;Acc:14504]	ENSG00000116898	ENSP00000362208
RNASET2	ribonuclease T2 [Source:HGNC Symbol;Acc:21686]	ENSG00000026297	ENSP00000426455
EIF2B1	eukaryotic translation initiation factor 2B, subunit 1 alpha, 26kDa [Source:HGNC Symbol;Acc:3257]	ENSG00000111361	ENSP00000443172
RPL36A	ribosomal protein L36a [Source:HGNC Symbol;Acc:10359]	ENSG00000269315	ENSP00000470206
RPL36AL	ribosomal protein L36a-like [Source:HGNC Symbol;Acc:10346]	ENSG00000165502	ENSP00000346012
DDX26B	DEAD/H (Asp-Glu-Ala-Asp/His) box polypeptide 26B [Source:HGNC Symbol;Acc:27334]	ENSG00000165359	ENSP00000359788
INTS6	integrator complex subunit 6 [Source:HGNC Symbol;Acc:14879]	ENSG00000102786	ENSP00000310260
RPS7	ribosomal protein S7 [Source:HGNC Symbol;Acc:10440]	ENSG00000171863	ENSP00000385018
RRNAD1	ribosomal RNA adenine dimethylase domain containing 1 [Source:HGNC Symbol;Acc:24273]	ENSG00000143303	ENSP00000357199
MRPS21	mitochondrial ribosomal protein S21 [Source:HGNC Symbol;Acc:14046]	ENSG00000187145	ENSP00000358080
SETD7	SET domain containing (lysine methyltransferase) 7 [Source:HGNC Symbol;Acc:30412]	ENSG00000145391	ENSP00000274031
RBM8A	RNA binding motif protein 8A [Source:HGNC Symbol;Acc:9905]	ENSG00000131795	ENSP00000333001
MAGOH	mago-nashi homolog, proliferation-associated (Drosophila) [Source:HGNC Symbol;Acc:6815]	ENSG00000162385	ENSP00000360525
MAGOHB	mago-nashi homolog B (Drosophila) [Source:HGNC Symbol;Acc:25504]	ENSG00000111196	ENSP00000371305
RPL37A	ribosomal protein L37a [Source:HGNC Symbol;Acc:10348]	ENSG00000197756	ENSP00000470348
NOLC1	nucleolar and coiled-body phosphoprotein 1 [Source:HGNC Symbol;Acc:15608]	ENSG00000166197	ENSP00000359024
IARS2	isoleucyl-tRNA synthetase 2, mitochondrial [Source:HGNC Symbol;Acc:29685]	ENSG00000067704	ENSP00000303279
LSM1	LSM1 homolog, U6 small nuclear RNA associated (S. cerevisiae) [Source:HGNC Symbol;Acc:20472]	ENSG00000175324	ENSP00000310596
SUPT4H1	suppressor of Ty 4 homolog 1 (S. cerevisiae) [Source:HGNC Symbol;Acc:11467]	ENSG00000213246	ENSP00000462100
EXO1	exonuclease 1 [Source:HGNC Symbol;Acc:3511]	ENSG00000174371	ENSP00000355506
DCP1B	DCP1 decapping enzyme homolog B (S. cerevisiae) [Source:HGNC Symbol;Acc:24451]	ENSG00000151065	ENSP00000280665
DCP1A	decapping mRNA 1A [Source:HGNC Symbol;Acc:18714]	ENSG00000162290	ENSP00000475920
DNAJC17	DnaJ (Hsp40) homolog, subfamily C, member 17 [Source:HGNC Symbol;Acc:25556]	ENSG00000104129	ENSP00000220496
RNGTT	RNA guanylyltransferase and 5'-phosphatase [Source:HGNC Symbol;Acc:10073]	ENSG00000111880	ENSP00000442609
DUSP11	dual specificity phosphatase 11 (RNA/RNP complex 1-interacting) [Source:HGNC Symbol;Acc:3066]	ENSG00000144048	ENSP00000272444
CHERP	calcium homeostasis endoplasmic reticulum protein [Source:HGNC Symbol;Acc:16930]	ENSG00000085872	ENSP00000439856
WDR61	WD repeat domain 61 [Source:HGNC Symbol;Acc:30300]	ENSG00000140395	ENSP00000267973
NANOS1	nanos homolog 1 (Drosophila) [Source:HGNC Symbol;Acc:23044]	ENSG00000188613	ENSP00000345924
NANOS2	nanos homolog 2 (Drosophila) [Source:HGNC Symbol;Acc:23292]	ENSG00000188425	ENSP00000341021
NANOS3	nanos homolog 3 (Drosophila) [Source:HGNC Symbol;Acc:22048]	ENSG00000187556	ENSP00000341992
EBNA1BP2	EBNA1 binding protein 2 [Source:HGNC Symbol;Acc:15531]	ENSG00000117395	ENSP00000236051
HELZ	helicase with zinc finger [Source:HGNC Symbol;Acc:16878]	ENSG00000198265	ENSP00000464512
RNMTL1	RNA methyltransferase like 1 [Source:HGNC Symbol;Acc:18485]	ENSG00000171861	ENSP00000306080
PDCD4	programmed cell death 4 (neoplastic transformation inhibitor) [Source:HGNC Symbol;Acc:8763]	ENSG00000150593	ENSP00000280154
PTRH2	peptidyl-tRNA hydrolase 2 [Source:HGNC Symbol;Acc:24265]	ENSG00000141378	ENSP00000464327
SART3	squamous cell carcinoma antigen recognized by T cells 3 [Source:HGNC Symbol;Acc:16860]	ENSG00000075856	ENSP00000228284
ZC3H10	zinc finger CCCH-type containing 10 [Source:HGNC Symbol;Acc:25893]	ENSG00000135482	ENSP00000257940
LSM2	LSM2 homolog, U6 small nuclear RNA associated (S. cerevisiae) [Source:HGNC Symbol;Acc:13940]	ENSG00000224979	ENSP00000414006
MRPS25	mitochondrial ribosomal protein S25 [Source:HGNC Symbol;Acc:14511]	ENSG00000131368	ENSP00000253686
RPP21	ribonuclease P/MRP 21kDa subunit [Source:HGNC Symbol;Acc:21300]	ENSG00000241863	ENSP00000408610
ZMAT2	zinc finger, matrin-type 2 [Source:HGNC Symbol;Acc:26433]	ENSG00000146007	ENSP00000473397
IFIT1	interferon-induced protein with tetratricopeptide repeats 1 [Source:HGNC Symbol;Acc:5407]	ENSG00000185745	ENSP00000360869
IFIT2	interferon-induced protein with tetratricopeptide repeats 2 [Source:HGNC Symbol;Acc:5409]	ENSG00000119922	ENSP00000360891
IFIT5	interferon-induced protein with tetratricopeptide repeats 5 [Source:HGNC Symbol;Acc:13328]	ENSG00000152778	ENSP00000360860
IFIT1B	interferon-induced protein with tetratricopeptide repeats 1B [Source:HGNC Symbol;Acc:23442]	ENSG00000204010	ENSP00000360874
IFIT3	interferon-induced protein with tetratricopeptide repeats 3 [Source:HGNC Symbol;Acc:5411]	ENSG00000119917	ENSP00000360883
NOVA1	neuro-oncological ventral antigen 1 [Source:HGNC Symbol;Acc:7886]	ENSG00000139910	ENSP00000438875
NOVA2	neuro-oncological ventral antigen 2 [Source:HGNC Symbol;Acc:7887]	ENSG00000104967	ENSP00000263257
SNRPD3	small nuclear ribonucleoprotein D3 polypeptide 18kDa [Source:HGNC Symbol;Acc:11160]	ENSG00000100028	ENSP00000215829
YARS2	tyrosyl-tRNA synthetase 2, mitochondrial [Source:HGNC Symbol;Acc:24249]	ENSG00000139131	ENSP00000320658
PTCD1	pentatricopeptide repeat domain 1 [Source:HGNC Symbol;Acc:22198] [Type: protein coding Ensembl/Havana merge]	ENSG00000106246	ENSP00000292478
TSR1	TSR1, 20S rRNA accumulation, homolog (S. cerevisiae) [Source:HGNC Symbol;Acc:25542]	ENSG00000167721	ENSP00000301364
MRPS6	mitochondrial ribosomal protein S6 [Source:HGNC Symbol;Acc:14051]	ENSG00000243927	ENSP00000382250
TAF9	TAF9 RNA polymerase II, TATA box binding protein (TBP)-associated factor, 32kDa [Source:HGNC Symbol;Acc:11542]	ENSG00000085231	ENSP00000370193
RPL11	ribosomal protein L11 [Source:HGNC Symbol;Acc:10301]	ENSG00000142676	ENSP00000398888
DDX23	DEAD (Asp-Glu-Ala-Asp) box polypeptide 23 [Source:HGNC Symbol;Acc:17347]	ENSG00000174243	ENSP00000310723
DDX59	DEAD (Asp-Glu-Ala-Asp) box polypeptide 59 [Source:HGNC Symbol;Acc:25360]	ENSG00000118197	ENSP00000356317
CCNT2	cyclin T2 [Source:HGNC Symbol;Acc:1600	ENSG00000082258	ENSP00000264157
CCNT1	cyclin T1 [Source:HGNC Symbol;Acc:1599]	ENSG00000129315	ENSP00000261900
RPL8	ribosomal protein L8 [Source:HGNC Symbol;Acc:10368]	ENSG00000161016	ENSP00000435313
SARNP	SAP domain containing ribonucleoprotein [Source:HGNC Symbol;Acc:24432]	ENSG00000205323	ENSP00000337632
IMP3	IMP3, U3 small nucleolar ribonucleoprotein, homolog (yeast) [Source:HGNC Symbol;Acc:14497]	ENSG00000177971	ENSP00000326981
SRRM4	serine/arginine repetitive matrix 4 [Source:HGNC Symbol;Acc:29389]	ENSG00000139767	ENSP00000267260
CNP	2',3'-cyclic nucleotide 3' phosphodiesterase [Source:HGNC Symbol;Acc:2158]	ENSG00000173786	ENSP00000377470
LIN28A	lin-28 homolog A (C. elegans) [Source:HGNC Symbol;Acc:15986]	ENSG00000131914	ENSP00000254231
LIN28B	lin-28 homolog B (C. elegans) [Source:HGNC Symbol;Acc:32207]	ENSG00000187772	ENSP00000344401
EIF3K	eukaryotic translation initiation factor 3, subunit K [Source:HGNC Symbol;Acc:24656]	ENSG00000178982	ENSP00000248342
SF3B14	Pre-mRNA branch site protein p14 [Source:UniProtKB/Swiss-Prot;Acc:Q9Y3B4]	ENSG00000115128	ENSP00000233468
EIF2S2	eukaryotic translation initiation factor 2, subunit 2 beta, 38kDa [Source:HGNC Symbol;Acc:3266]	ENSG00000125977	ENSP00000364119
RNMT	RNA (guanine-7-) methyltransferase [Source:HGNC Symbol;Acc:10075]	ENSG00000101654	ENSP00000372804
MRPL42	mitochondrial ribosomal protein L42 [Source:HGNC Symbol;Acc:14493]	ENSG00000198015	ENSP00000449884
THRAP3	thyroid hormone receptor associated protein 3 [Source:HGNC Symbol;Acc:22964]	ENSG00000054118	ENSP00000433825
BCLAF1	BCL2-associated transcription factor 1 [Source:HGNC Symbol;Acc:16863]	ENSG00000029363	ENSP00000376159
CXorf23	chromosome X open reading frame 23 [Source:HGNC Symbol;Acc:27413]	ENSG00000173681	ENSP00000349470
PNO1	partner of NOB1 homolog (S. cerevisiae) [Source:HGNC Symbol;Acc:32790]	ENSG00000115946	ENSP00000263657
RBM4	RNA binding motif protein 4 [Source:HGNC Symbol;Acc:9901]	ENSG00000173933	ENSP00000309166
RBM4B	RNA binding motif protein 4B [Source:HGNC Symbol;Acc:28842]	ENSG00000173914	ENSP00000310471
RBM14	RNA binding motif protein 14 [Source:HGNC Symbol;Acc:14219]	ENSG00000239306	ENSP00000311747
R3HCC1	R3H domain and coiled-coil containing 1 [Source:HGNC Symbol;Acc:27329]	ENSG00000104679	ENSP00000397555
R3HCC1L	R3H domain and coiled-coil containing 1-like [Source:HGNC Symbol;Acc:23512]	ENSG00000166024	ENSP00000314018
KIAA0430	KIAA0430 [Source:HGNC Symbol;Acc:29562]	ENSG00000166783	ENSP00000379654
POP5	processing of precursor 5, ribonuclease P/MRP subunit (S. cerevisiae) [Source:HGNC Symbol;Acc:17689]	ENSG00000167272	ENSP00000341791
MRPL51	mitochondrial ribosomal protein L51 [Source:HGNC Symbol;Acc:14044]	ENSG00000111639	ENSP00000229238
MARS	methionyl-tRNA synthetase [Source:HGNC Symbol;Acc:6898]	ENSG00000166986	ENSP00000262027
TYW1	tRNA-yW synthesizing protein 1 homolog (S. cerevisiae) [Source:HGNC Symbol;Acc:25598]	ENSG00000198874	ENSP00000352645
MRPL16	mitochondrial ribosomal protein L16 [Source:HGNC Symbol;Acc:14476]	ENSG00000166902	ENSP00000436592
DUS1L	dihydrouridine synthase 1-like (S. cerevisiae) [Source:HGNC Symbol;Acc:30086]	ENSG00000169718	ENSP00000445110
QRSL1	glutaminyl-tRNA synthase (glutamine-hydrolyzing)-like 1 [Source:HGNC Symbol;Acc:21020]	ENSG00000130348	ENSP00000358042
WARS2	tryptophanyl tRNA synthetase 2, mitochondrial [Source:HGNC Symbol;Acc:12730]	ENSG00000116874	ENSP00000235521
WRAP53	WD repeat containing, antisense to TP53 [Source:HGNC Symbol;Acc:25522]	ENSG00000141499	ENSP00000324203
RSL24D1	ribosomal L24 domain containing 1 [Source:HGNC Symbol;Acc:18479]	ENSG00000137876	ENSP00000454492
SF3B4	splicing factor 3b, subunit 4, 49kDa [Source:HGNC Symbol;Acc:10771]	ENSG00000143368	ENSP00000391114
TDRD7	tudor domain containing 7 [Source:HGNC Symbol;Acc:30831]	ENSG00000196116	ENSP00000347444
LARP1	La ribonucleoprotein domain family, member 1 [Source:HGNC Symbol;Acc:29531]	ENSG00000155506	ENSP00000336721
LARP1B	La ribonucleoprotein domain family, member 1B [Source:HGNC Symbol;Acc:24704]	ENSG00000138709	ENSP00000422850
RPL23A	ribosomal protein L23a [Source:HGNC Symbol;Acc:10317]	ENSG00000198242	ENSP00000389103
BAZ2A	bromodomain adjacent to zinc finger domain, 2A [Source:HGNC Symbol;Acc:962]	ENSG00000076108	ENSP00000446880
BAZ2B	bromodomain adjacent to zinc finger domain, 2B [Source:HGNC Symbol;Acc:963]	ENSG00000123636	ENSP00000376533
EIF3E	eukaryotic translation initiation factor 3, subunit E [Source:HGNC Symbol;Acc:3277]	ENSG00000104408	ENSP00000220849
CWC15	CWC15 spliceosome-associated protein homolog (S. cerevisiae) [Source:HGNC Symbol;Acc:26939]	ENSG00000261974	ENSP00000461115
TOP1	topoisomerase (DNA) I [Source:HGNC Symbol;Acc:11986]	ENSG00000198900	ENSP00000354522
RPL31	ribosomal protein L31 [Source:HGNC Symbol;Acc:10334]	ENSG00000071082	ENSP00000387120
SUPT6H	suppressor of Ty 6 homolog (S. cerevisiae) [Source:HGNC Symbol;Acc:11470]	ENSG00000109111	ENSP00000319104
TST	thiosulfate sulfurtransferase (rhodanese) [Source:HGNC Symbol;Acc:12388]	ENSG00000128311	ENSP00000385828
HNRNPU	heterogeneous nuclear ribonucleoprotein U (scaffold attachment factor A) [Source:HGNC Symbol;Acc:5048]	ENSG00000153187	ENSP00000393151
HNRNPUL1	heterogeneous nuclear ribonucleoprotein U-like 1 [Source:HGNC Symbol;Acc:17011]	ENSG00000105323	ENSP00000375863
HNRNPUL2	heterogeneous nuclear ribonucleoprotein U-like 2 [Source:HGNC Symbol;Acc:25451]	ENSG00000214753	ENSP00000301785
RPS25	ribosomal protein S25 [Source:HGNC Symbol;Acc:10413]	ENSG00000118181	ENSP00000435096
MRPL23	mitochondrial ribosomal protein L23 [Source:HGNC Symbol;Acc:10322]	ENSG00000214026	ENSP00000370930
EIF1AD	eukaryotic translation initiation factor 1A domain containing [Source:HGNC Symbol;Acc:28147]	ENSG00000175376	ENSP00000436644
SETX	senataxin [Source:HGNC Symbol;Acc:445]	ENSG00000107290	ENSP00000224140
MARS2	methionyl-tRNA synthetase 2, mitochondrial [Source:HGNC Symbol;Acc:25133]	ENSG00000247626	ENSP00000282276
CNOT3	CCR4-NOT transcription complex, subunit 3 [Source:HGNC Symbol;Acc:7879]	ENSG00000088038	ENSP00000383954
MTIF2	mitochondrial translational initiation factor 2 [Source:HGNC Symbol;Acc:7441]	ENSG00000085760	ENSP00000378099
JAKMIP1	janus kinase and microtubule interacting protein 1 [Source:HGNC Symbol;Acc:26460]	ENSG00000152969	ENSP00000386711
FASTKD1	FAST kinase domains 1 [Source:HGNC Symbol;Acc:26150]	ENSG00000138399	ENSP00000400513
